# Supplementary material for: Visible-light-mediated difunctionalization of vinylcyclopropanes for the synthesis of 1-sulfonylmethyl-3,4-dihydronaphthalenes
Source: Royal Society of Chemistry journal article supplement (doi:10.1039/c9ob01321k), 2019-01-01

## Supporting Information

### Visible-light-mediated difunctionalization of C–C bond for the synthesis of 1- sulfonylmethyl-3,4-dihydronaphthalenes

Qiao-Lin Wang,<sup>†</sup> Wen-Zheng Zhang,<sup>†</sup> Quan-Zhou, Cong-Shan Zhou, Bi-Quan Xiong,  
Ke-Wen Tang, Yu Liu\*

Department of Chemistry and Chemical Engineering, Hunan Institute of Science and  
Technology, Yueyang 414006, P. R. China

Fax: (+86)-730-8640-122; phone: (+86)-730-8640-122; email: [lyxtmj\\_613@163.com](mailto:lyxtmj_613@163.com)

#### List of Contents

|                                                                                                                                                                                                                                                                        |               |
|------------------------------------------------------------------------------------------------------------------------------------------------------------------------------------------------------------------------------------------------------------------------|---------------|
| <b>1. General Information</b>                                                                                                                                                                                                                                          | <b>S1</b>     |
| <b>2. Experimental Section</b>                                                                                                                                                                                                                                         | <b>S2</b>     |
| <b>2.1 General procedure for the synthesis of vinylcyclopropanes:</b>                                                                                                                                                                                                  | <b>S1</b>     |
| <b>2.2 Typical experimental procedure for the visible-light-mediated C–C <math>\sigma</math>-<br/>    bond sulfonylation/arylation of vinylcyclopropanes with sulfonyl chlorides<br/>    for the synthesis of 1-sulfonylmethyl-substituted 3,4-dihydronaphthalenes</b> | <b>S1-S2</b>  |
| <b>2.3 The Quantum Yield of the reaction of substrate 1a and benzenesulfonyl<br/>    chloride 2a under the optimal conditions</b>                                                                                                                                      | <b>S2</b>     |
| <b>3. Reference</b>                                                                                                                                                                                                                                                    | <b>S3</b>     |
| <b>4. Spectra</b>                                                                                                                                                                                                                                                      | <b>S4-S77</b> |

## 1. General Information

All reactions were carried out with magnetic stirring and in dried glassware. Standard syringe techniques were applied for transfer of dry solvents. All reagents and solvents were commercially available and used without any further purification unless specified. Proton ( $^1\text{H}$  NMR) and carbon ( $^{13}\text{C}$  NMR) nuclear magnetic resonance spectra were recorded at 400 MHz and 100MHz, respectively. The chemical shifts are given in parts per million (ppm) on the delta ( $\delta$ ) scale. The solvent peak was used as a reference value, for  $^1\text{H}$  NMR: TMS = 0.00 ppm, for  $^{13}\text{C}$  NMR:  $\text{CDCl}_3$  = 77.00 ppm. The following abbreviations were used to explain multiplicities: s = singlet, d = doublet, dd = doublet of doublet, t = triplet, td = triplet of doublet, q = quartet, m = multiplet, and br = broad. Analytical TLC was performed on precoated silica gel plates. High-resolution mass spectra (HRMS) were obtained on an Agilent mass spectrometer using ESI-TOF (electrospray ionization-time of flight).

## 2. Experiment Section

### 2.1 General procedure for the synthesis of vinylcyclopropanes (1):

All vinylcyclopropanes (**1**) were synthesized according to the known methods.<sup>1</sup>

### 2.2 Typical Experimental Procedure for the visible-light-mediated C–C $\sigma$ -bond sulfonylation/arylation of vinylcyclopropanes with sulfonyl chlorides for the synthesis of 1-sulfonylmethyl-3,4-dihydronaphthalenes

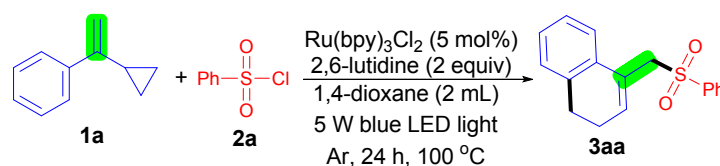

To a Schlenk tube were added **1a** (0.2 mmol), **2a** (2.0 equiv, 0.4 mmol),  $\text{Ru}(\text{bpy})_3\text{Cl}_2$  (5 mol %, 0.01 mmol), 2,6-lutidine (2 equiv, 0.4 mmol) in 1,4-dioxane (2 mL). Then the mixture was stirred at 100 °C (oil bath temperature) in argon atmosphere (1 atm) under 5 W blue LED light for 24 h until complete consumption of starting material as monitored by TLC and GC-MS analysis. After the reaction was finished, the reaction mixture was washed with brine. The

aqueous phase was re-extracted with EtOAc ( $3 \times 10$  mL). The combined organic extracts were dried over  $\text{Na}_2\text{SO}_4$  and concentrated in vacuum. The residue was purified by silica gel flash column chromatography (hexane/ethyl acetate = 10 : 1 to 5 : 1) to afford the desired products **3**.

### 2.3 The Quantum Yield of the reaction of substrate **1a** and benzenesulfonyl chloride **2a** under the optimal conditions

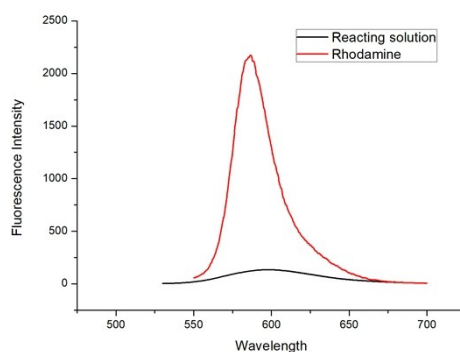

$F_s$  Integrated area of fluorescence of Rhodamine B: 79780 (red line)

$F_u$  Integrated area of fluorescence of reaction system: 9673 (black line)

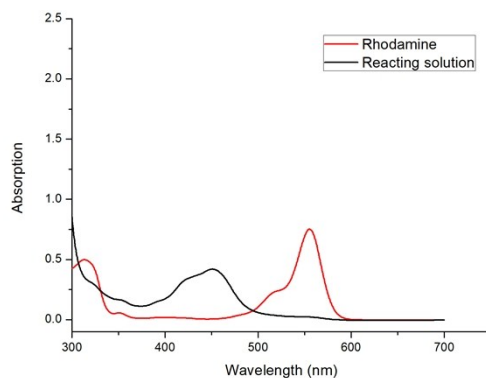

$A_s$  UV-Vis absorption of Rhodamine B at 350nm: 0.054 (red line)

$A_u$  UV-Vis absorption of reaction system at 450nm: 0.42 (black line)

$$Y_u = Y_s \cdot (F_u/F_s) \cdot (A_s/A_u)$$

$F_u = 9673$ ,  $F_s = 79780$ ,  $A_s$  (350 nm) = 0.054,  $A_u$  (450 nm) = 0.42

$$Y_u = Y_s \cdot (F_u/F_s) \cdot (A_s/A_u) = 0.016 Y_s$$

### 3. References

- [1] J. Li, J.-Z. Chen, W. Jiao, G.-Q. Wang, Y. Li, X. Cheng and G.-G. Li, *J. Org. Chem.*, 2016, **81**, 9992.
- [2] Liu, Y.; Wang, Q. L.; Zhou, C. S.; Xiong, B. Q.; Zhang, P. L.; Yang, C. A.; Tang, K. W. *J. Org. Chem.* 2017, **82**, 7394.
- [3] Liu, Y.; Wang, Q. L.; Zhou, C. S.; Xiong, B. Q.; Zhang, P. L.; Yang, C. A.; Tang, K. W. *J. Org. Chem.* 2018, **83**, 4657.

## 4. Spectra

4-((Phenylsulfonyl)methyl)-1,2-dihydronaphthalene (3aa)

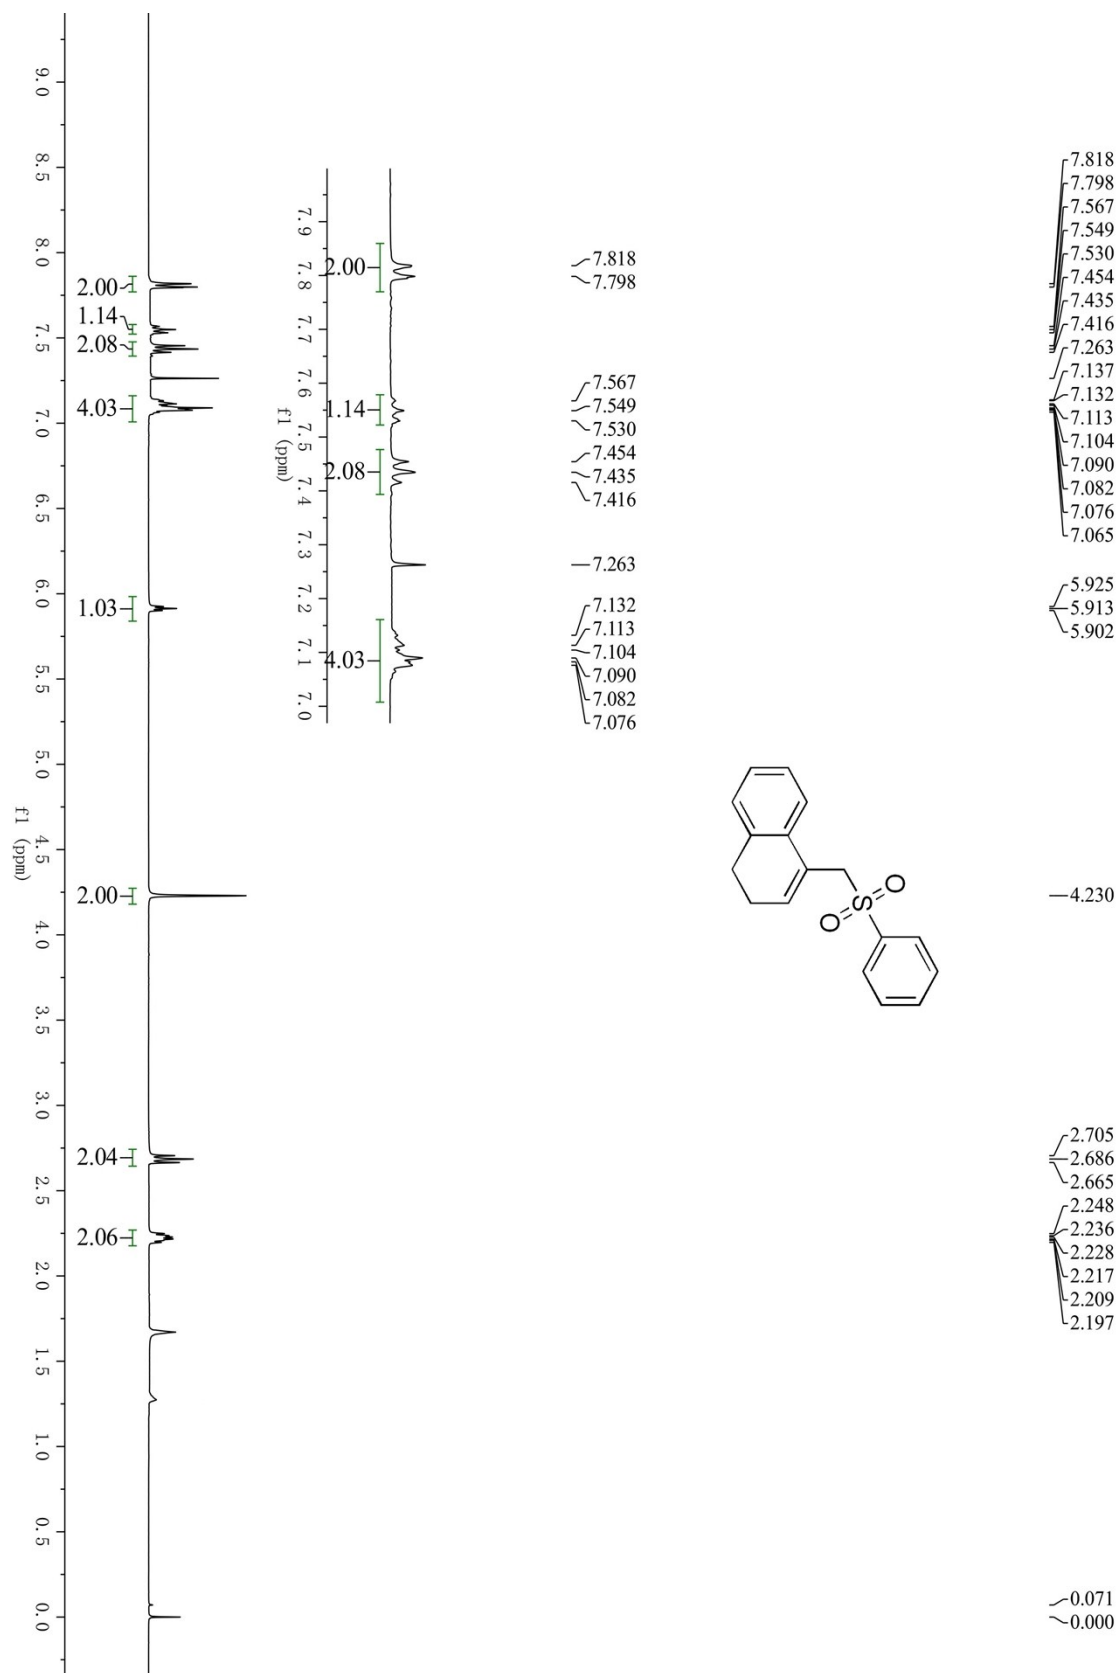

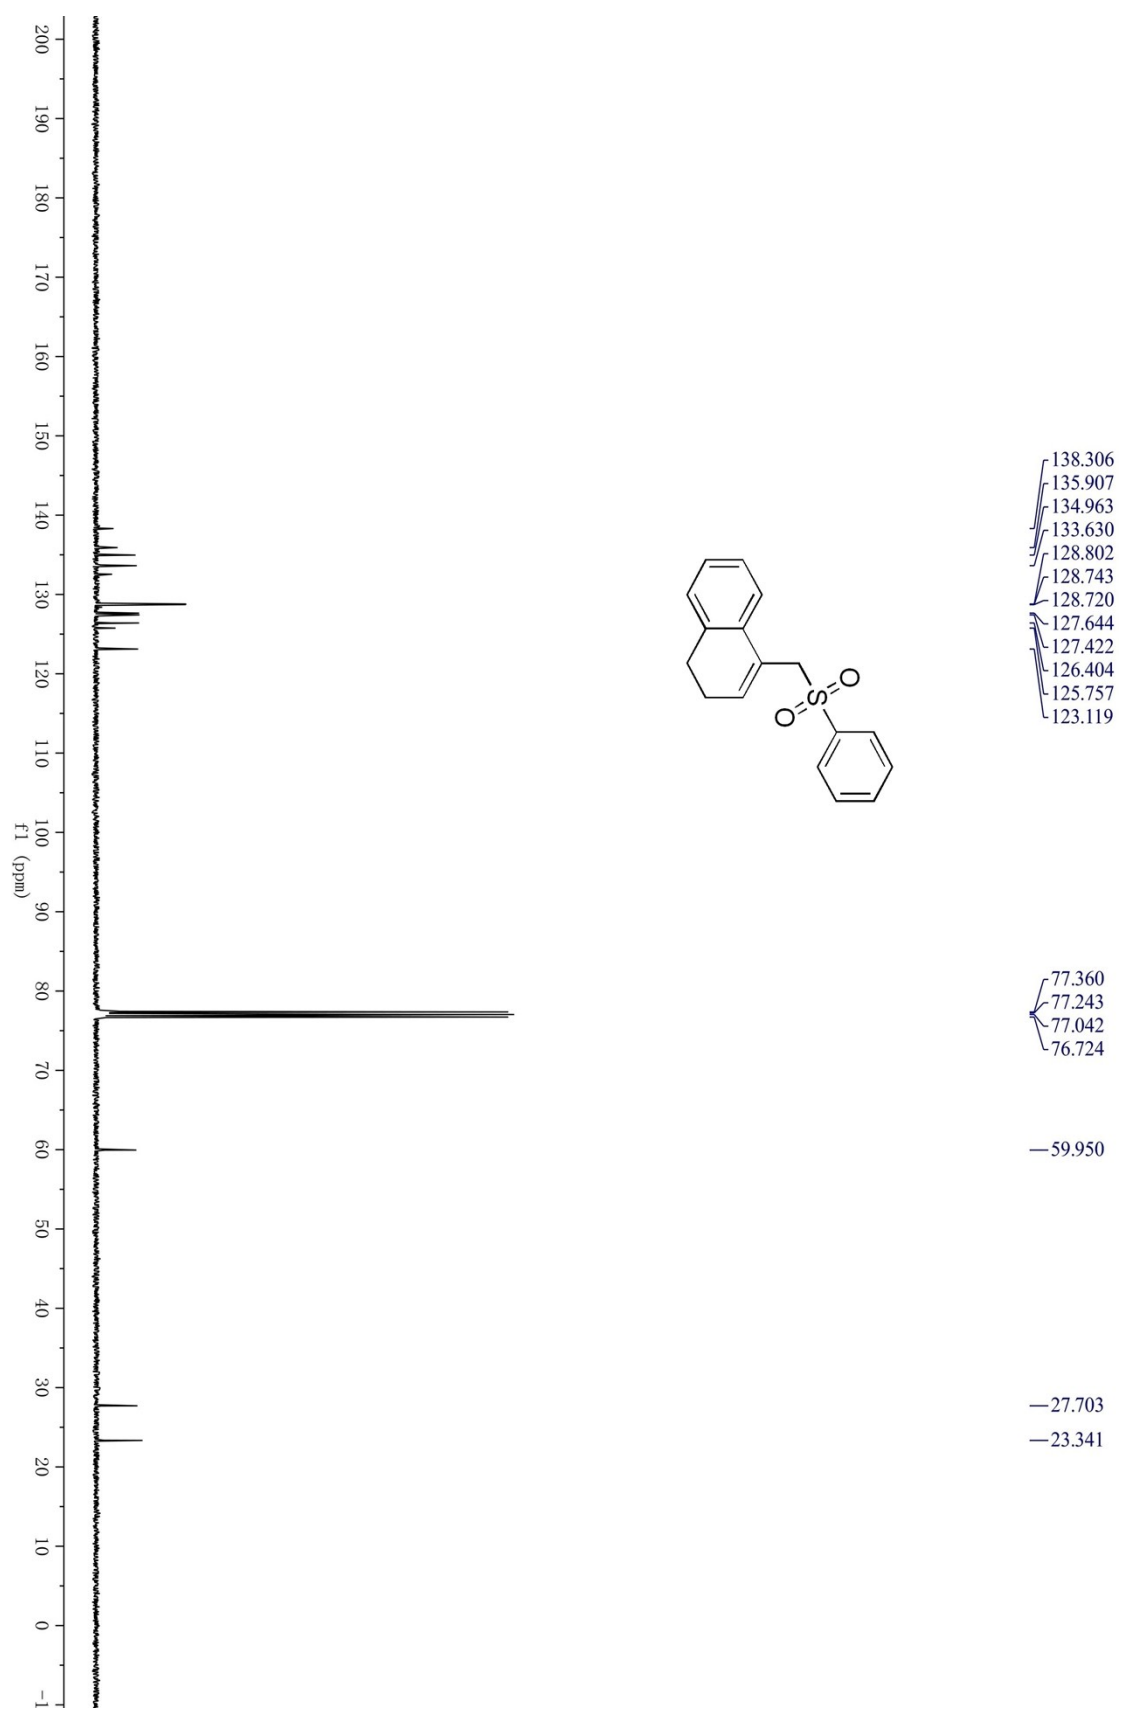

4-(Tosylmethyl)-1,2-dihydronaphthalene (3ab)

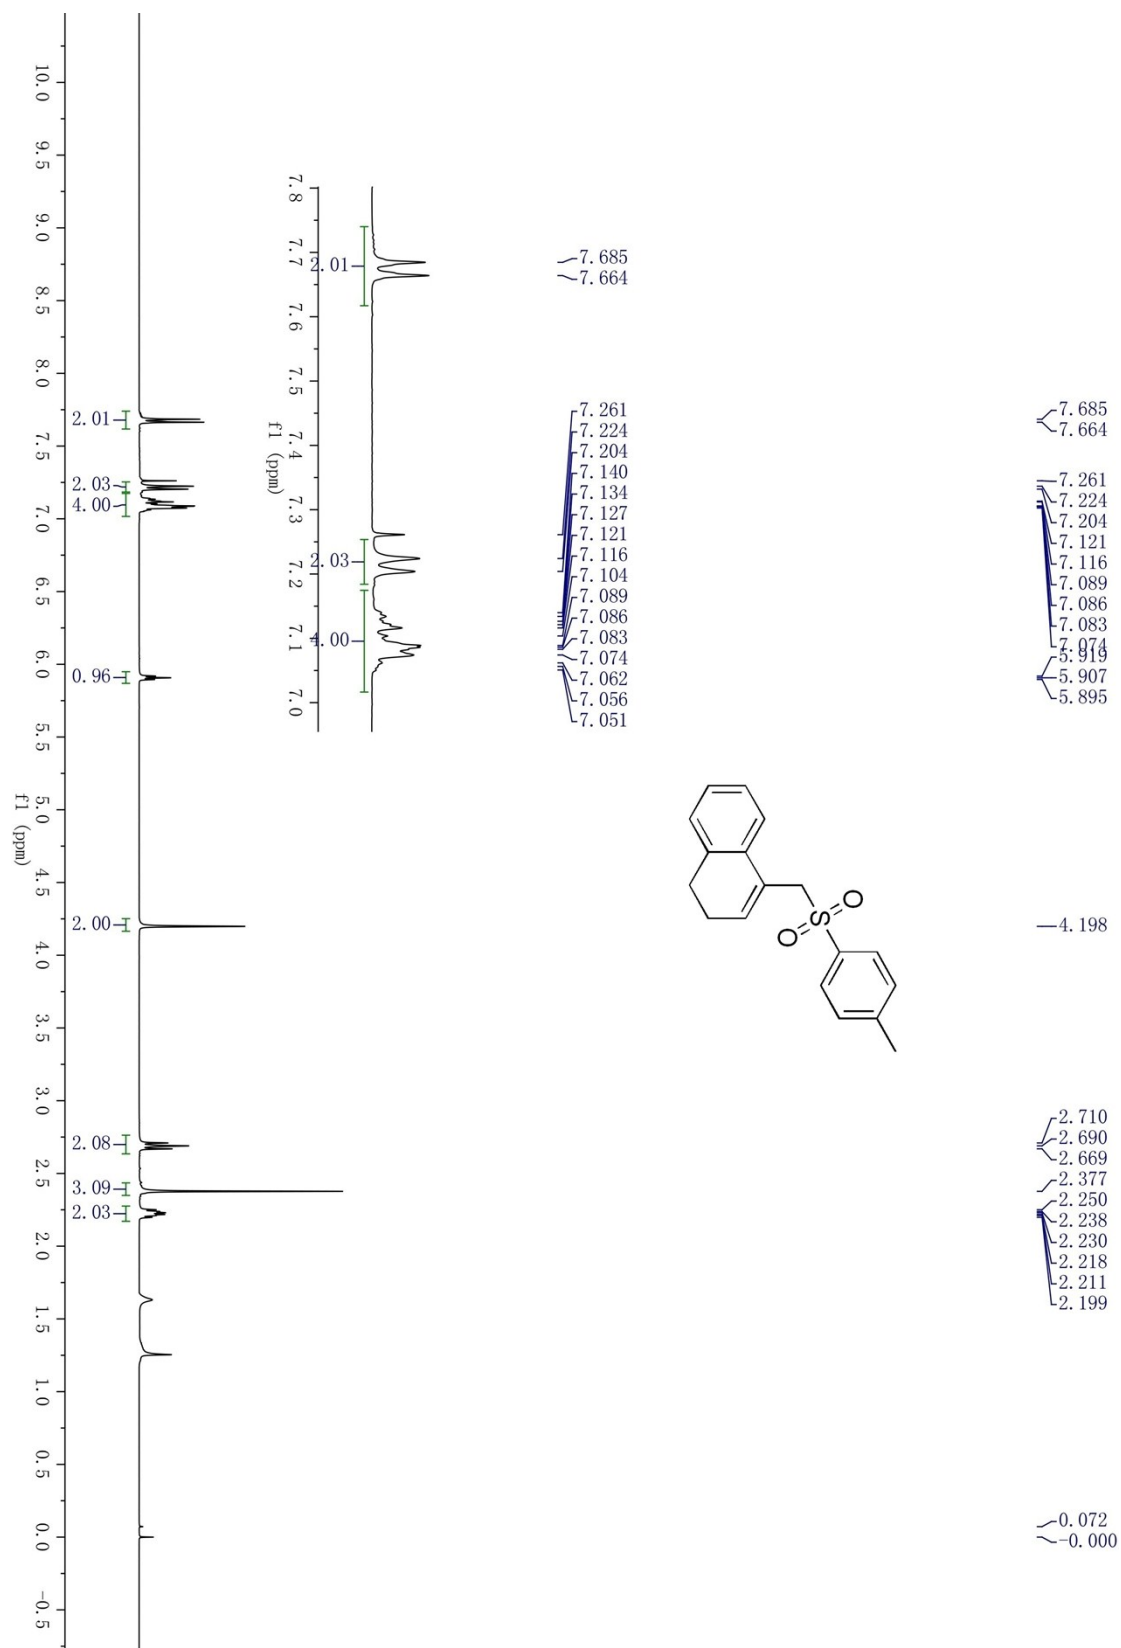

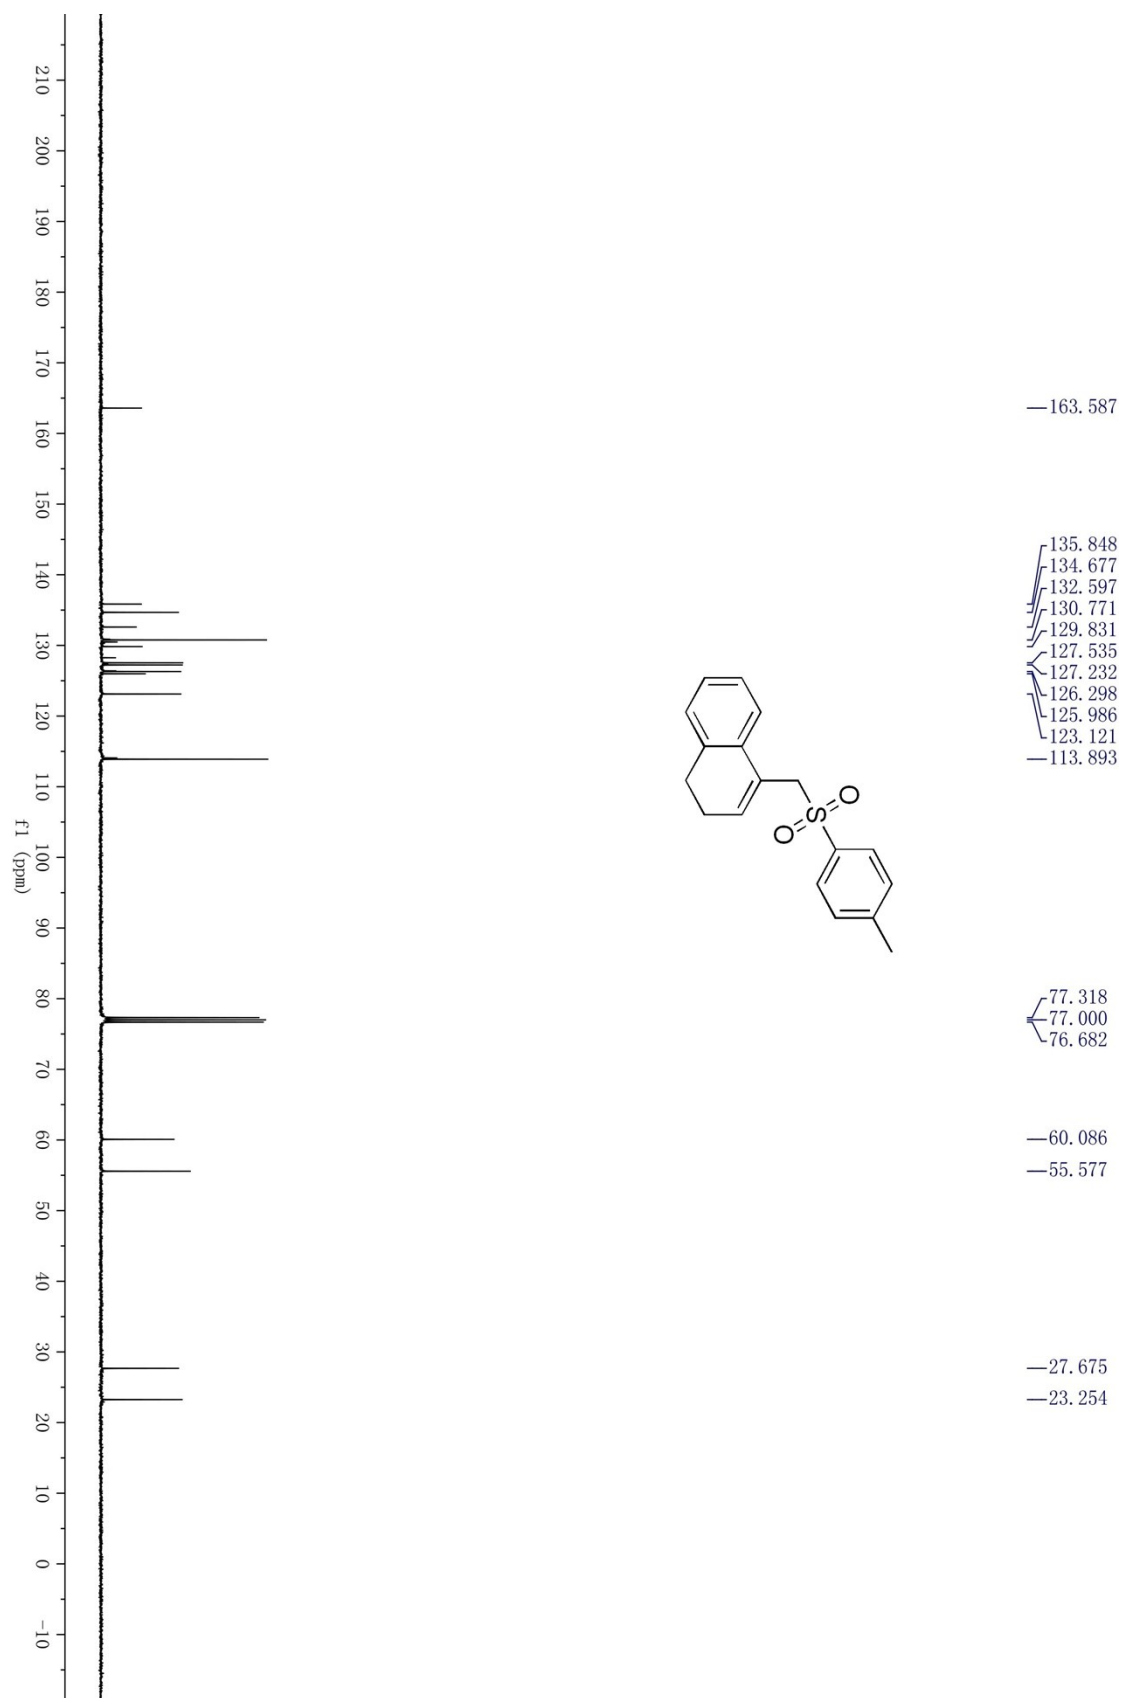



4-(((4-Methoxyphenyl)sulfonyl)methyl)-1,2-dihydronaphthalene (3ac)

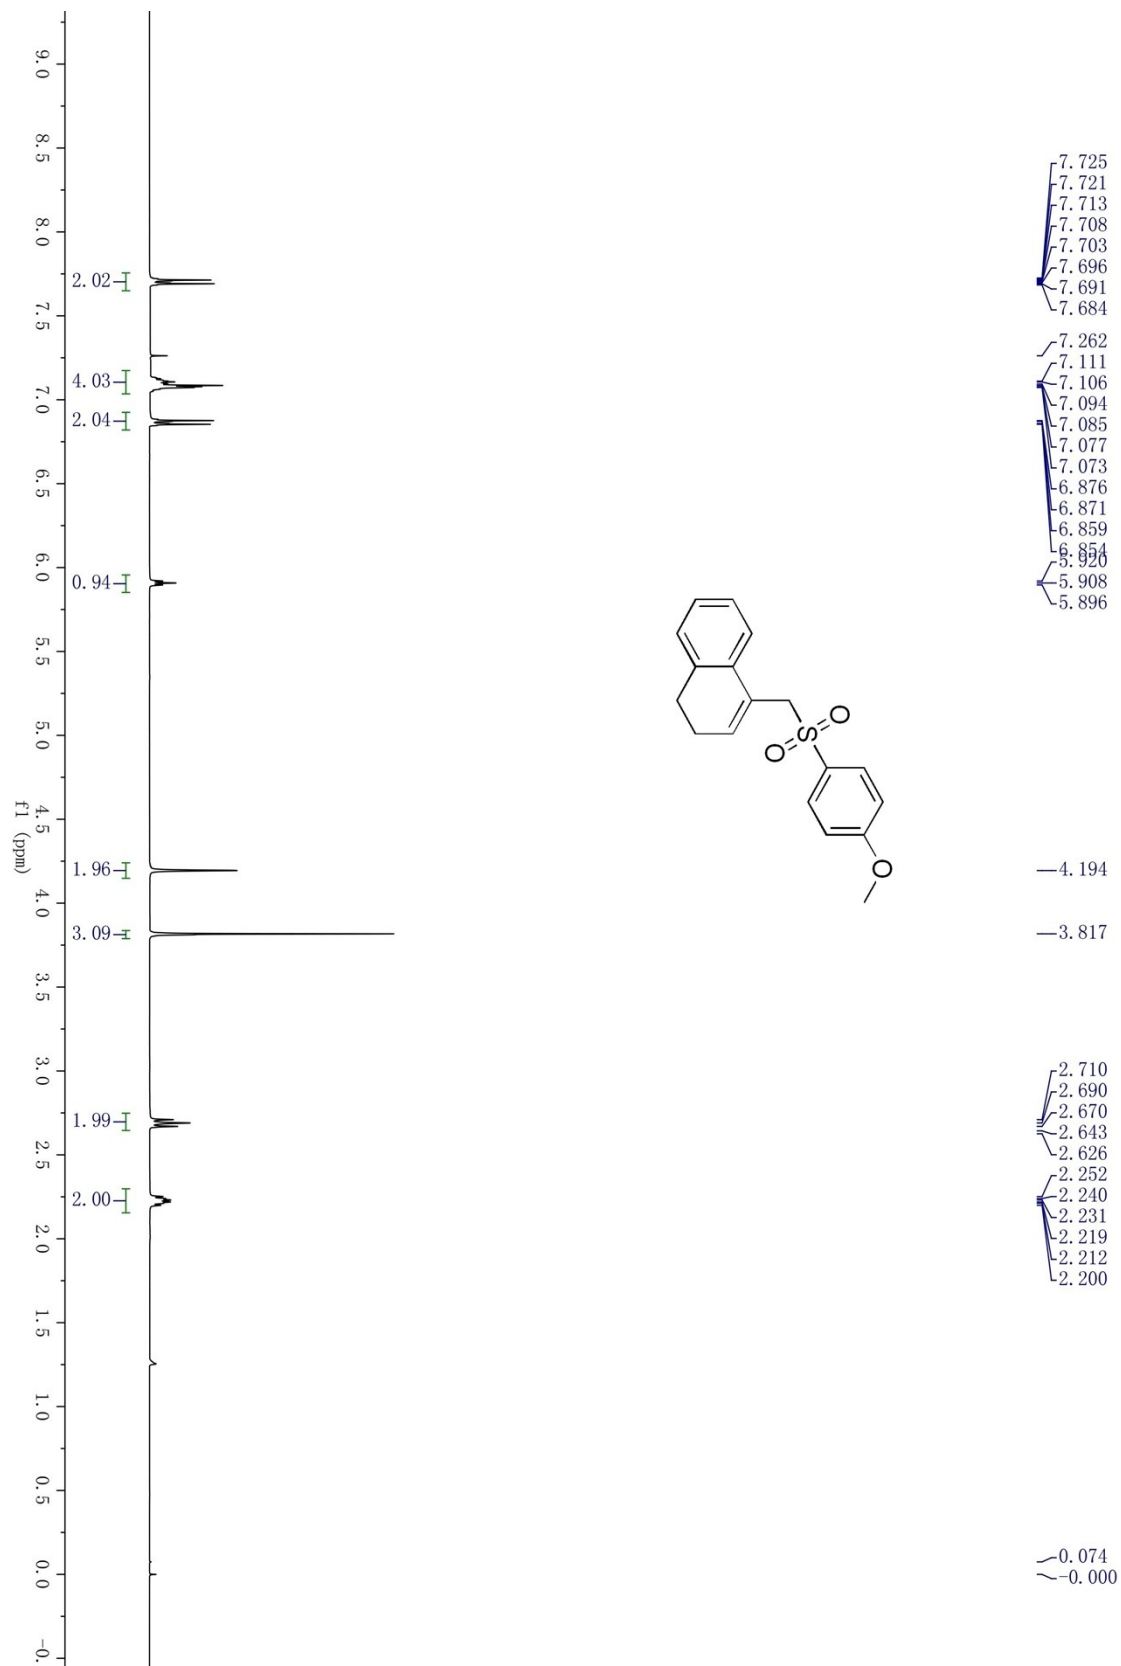

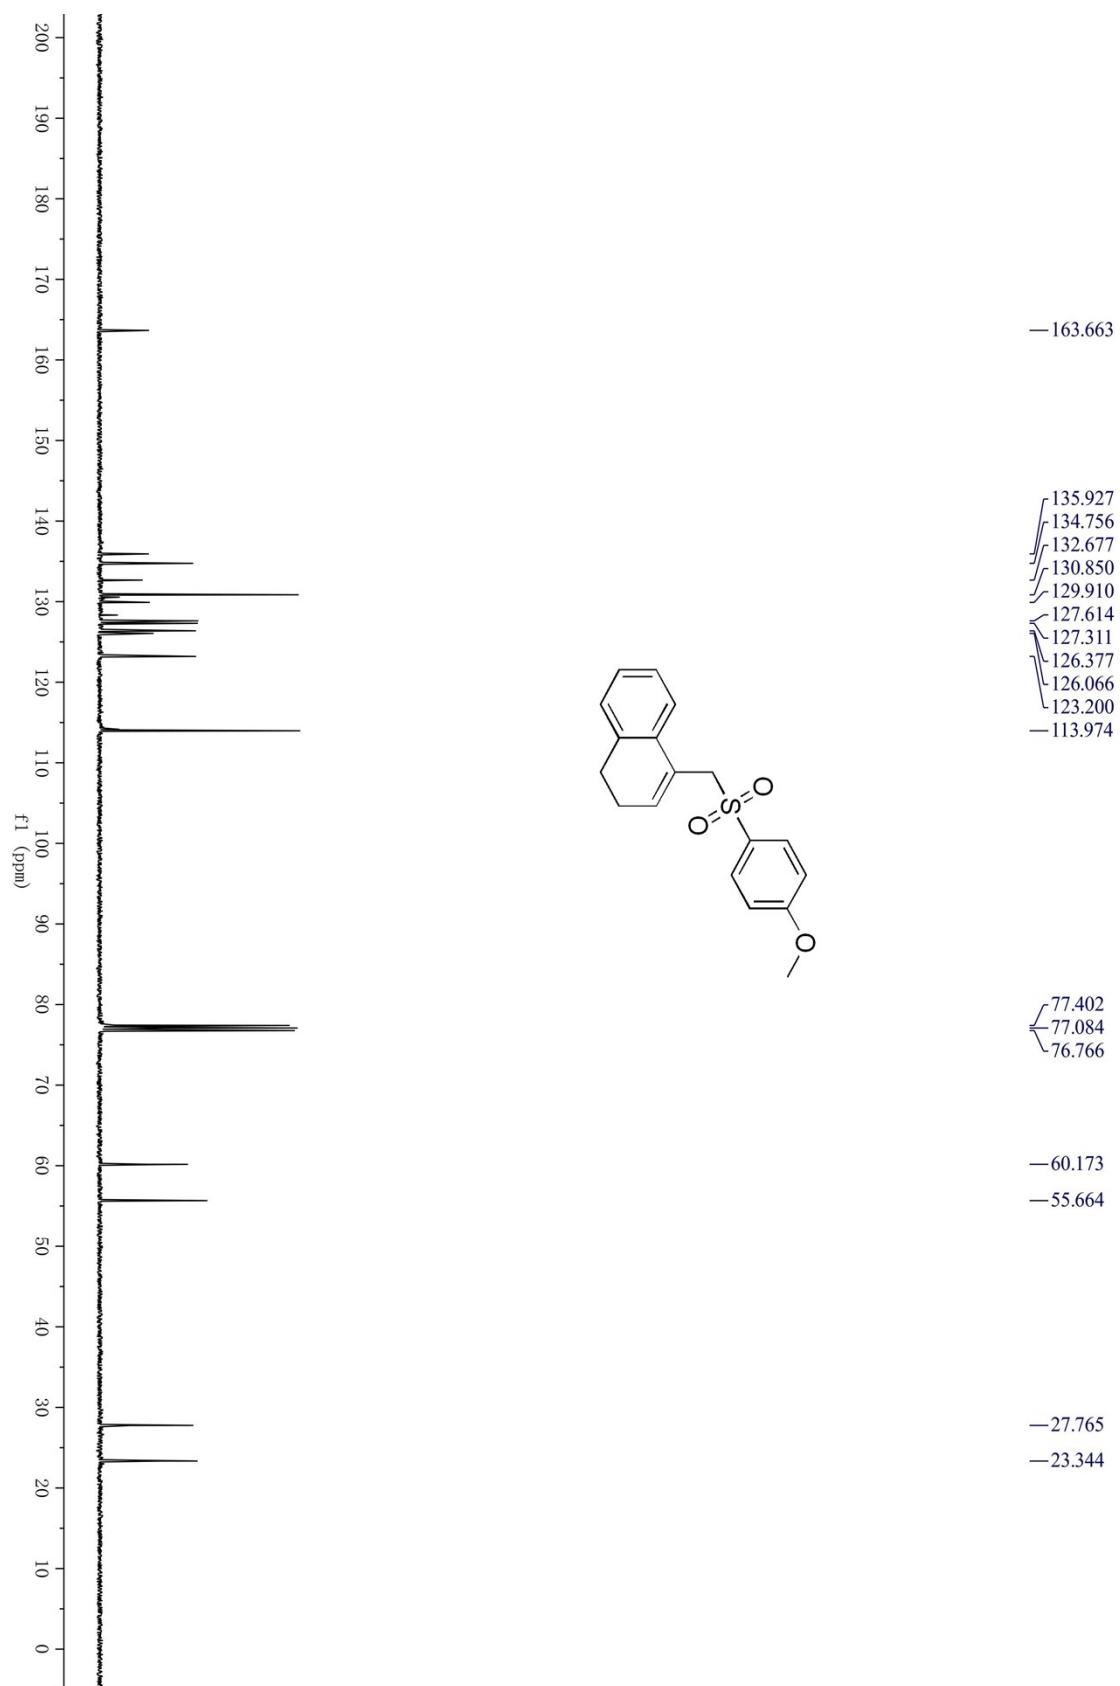

4-(((4-(*tert*-Butyl)phenyl)sulfonyl)methyl)-1,2-dihydronaphthalene (3ad)

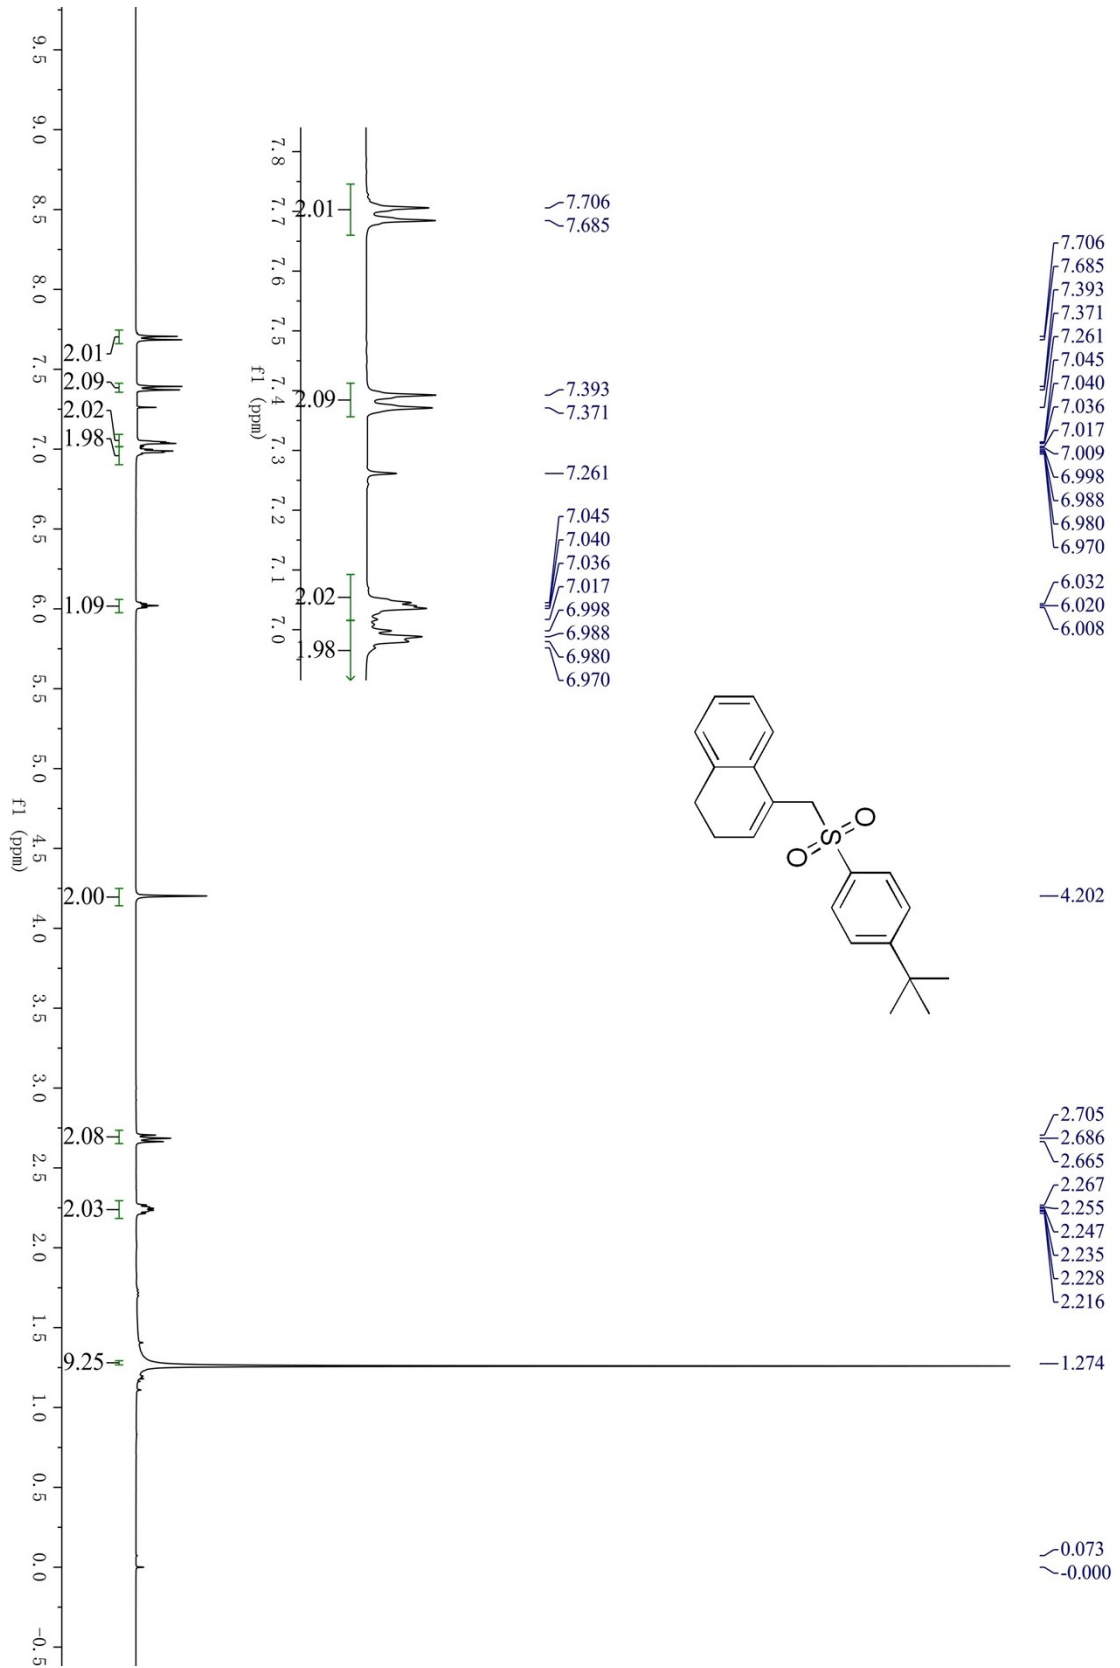

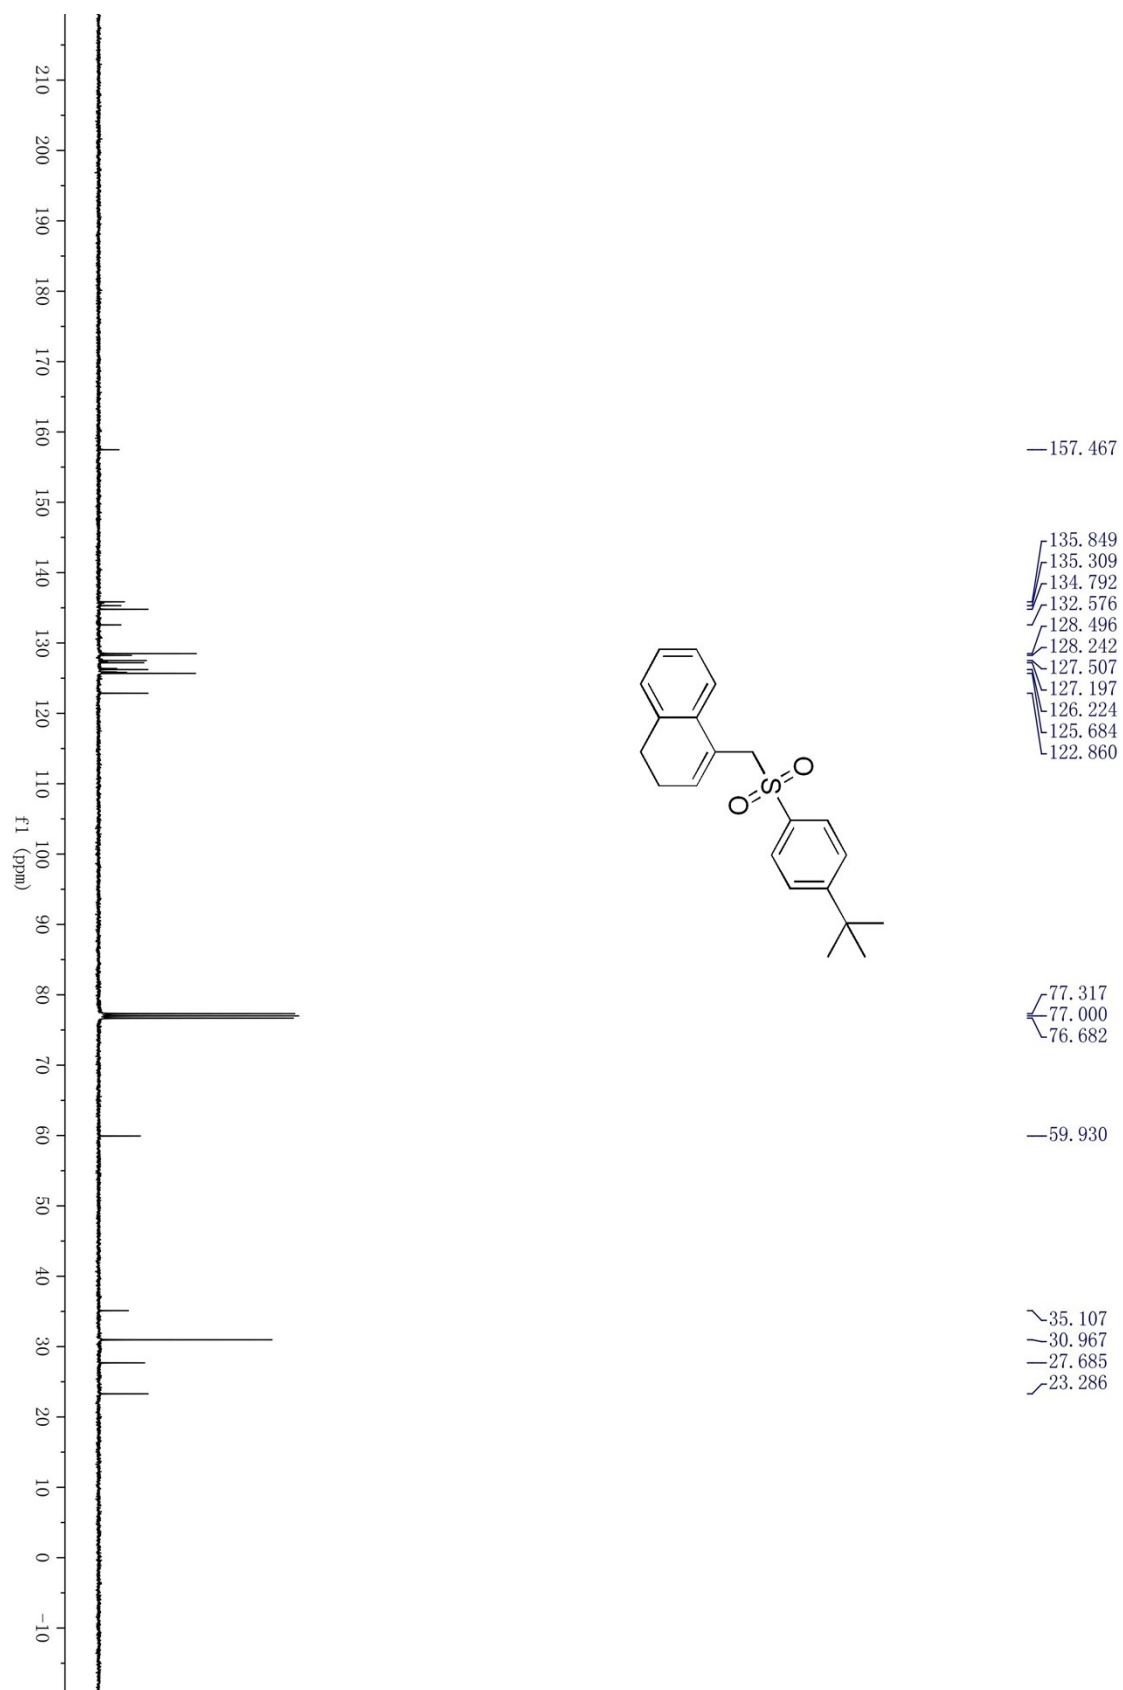

4-(((4-Fluorophenyl)sulfonyl)methyl)-1,2-dihydronaphthalene (3ae)

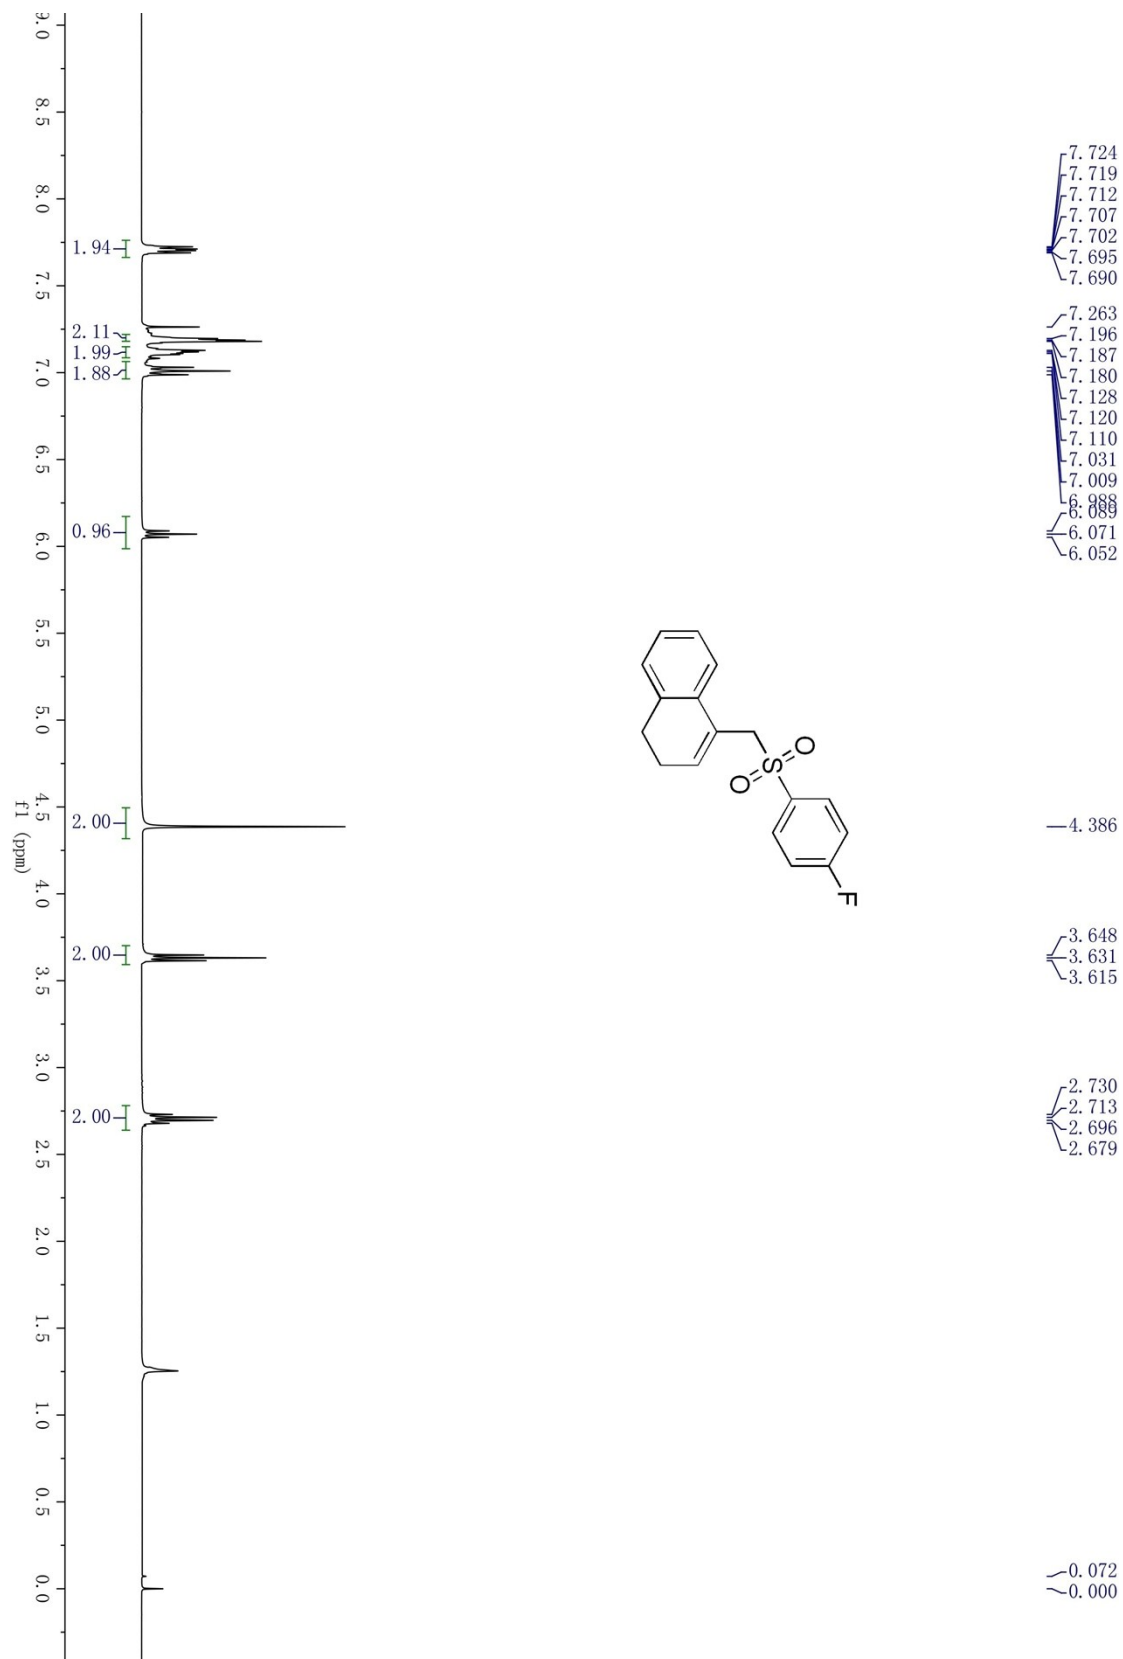

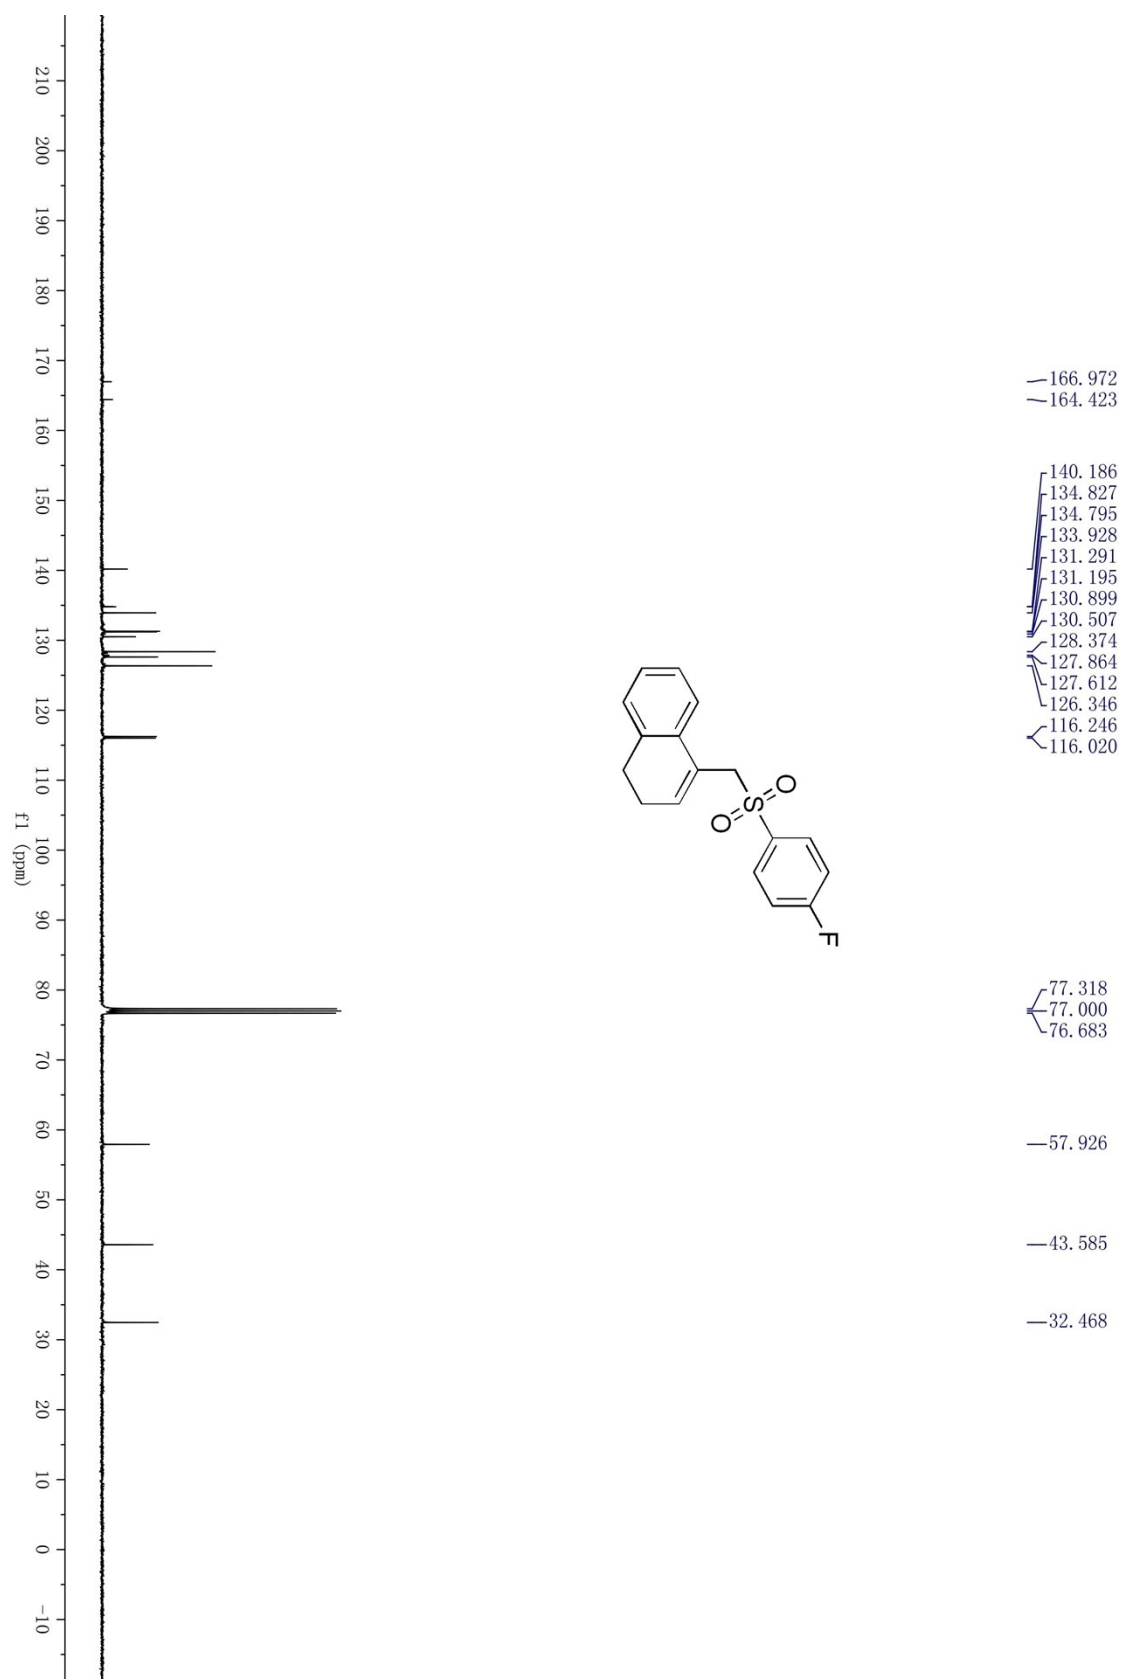

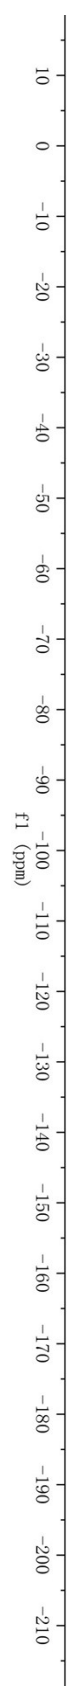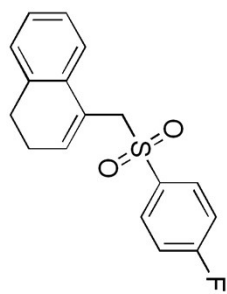

—103.523

4-(((4-Chlorophenyl)sulfonyl)methyl)-1,2-dihydronaphthalene(3af)

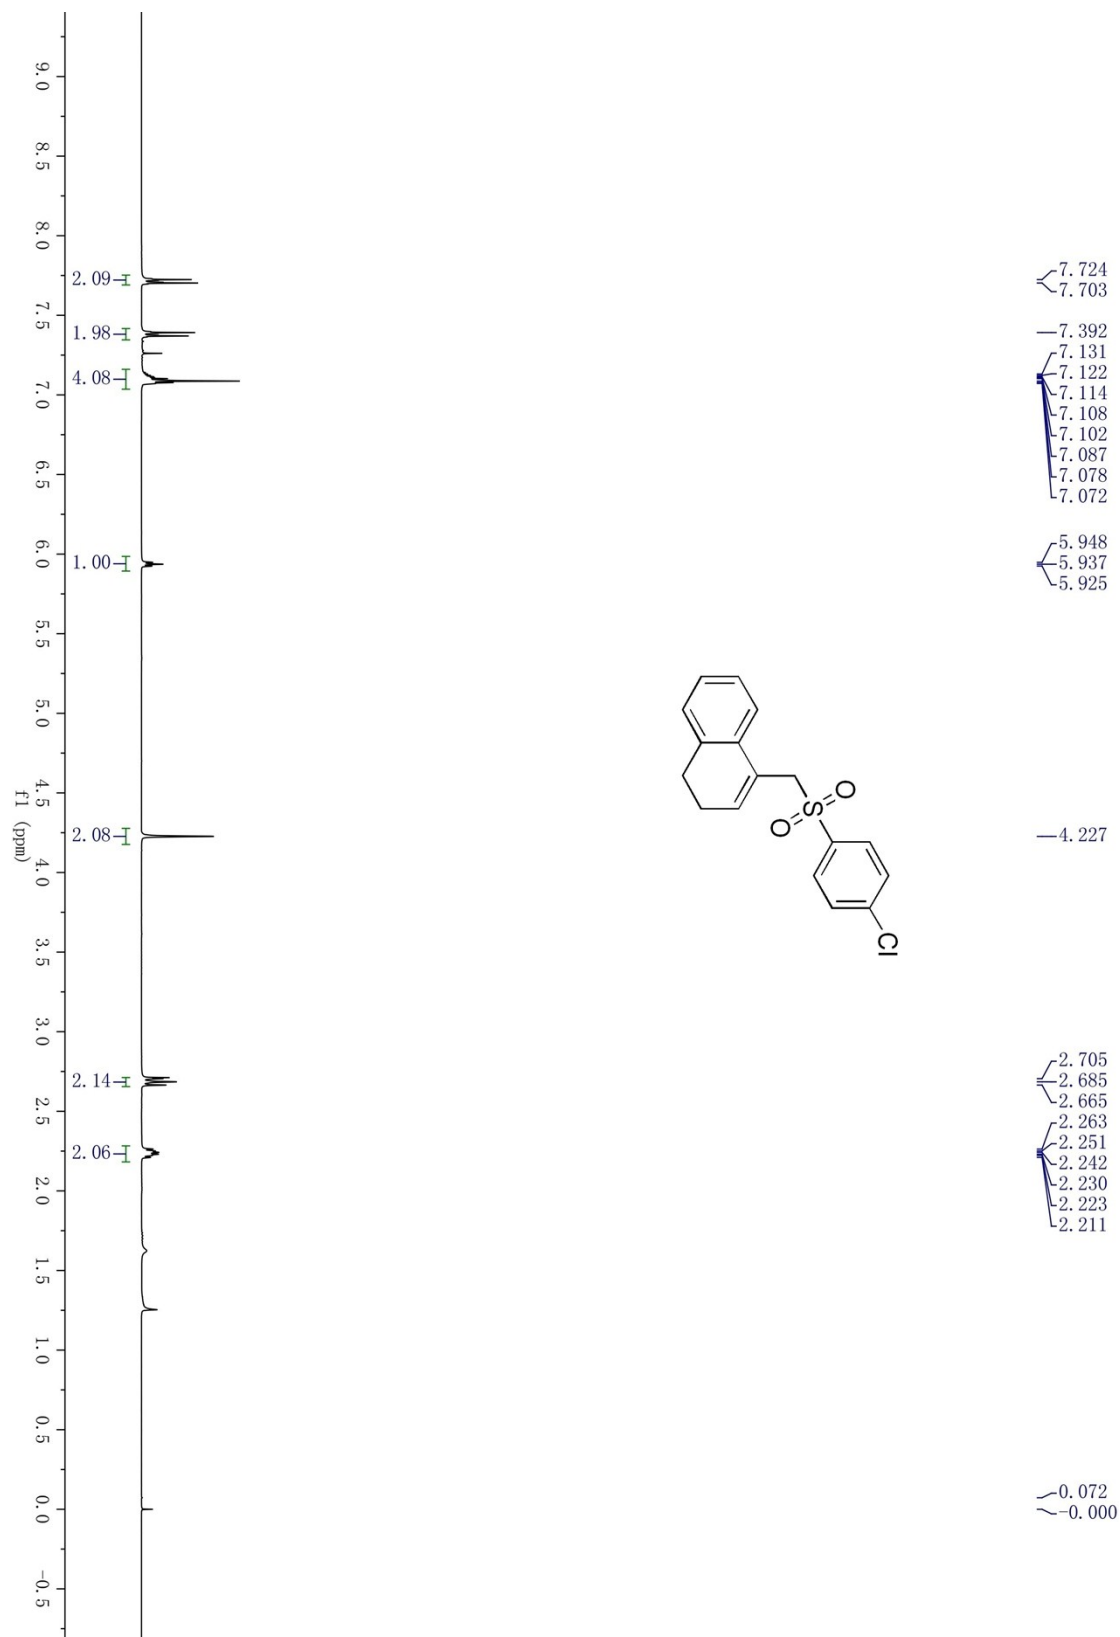



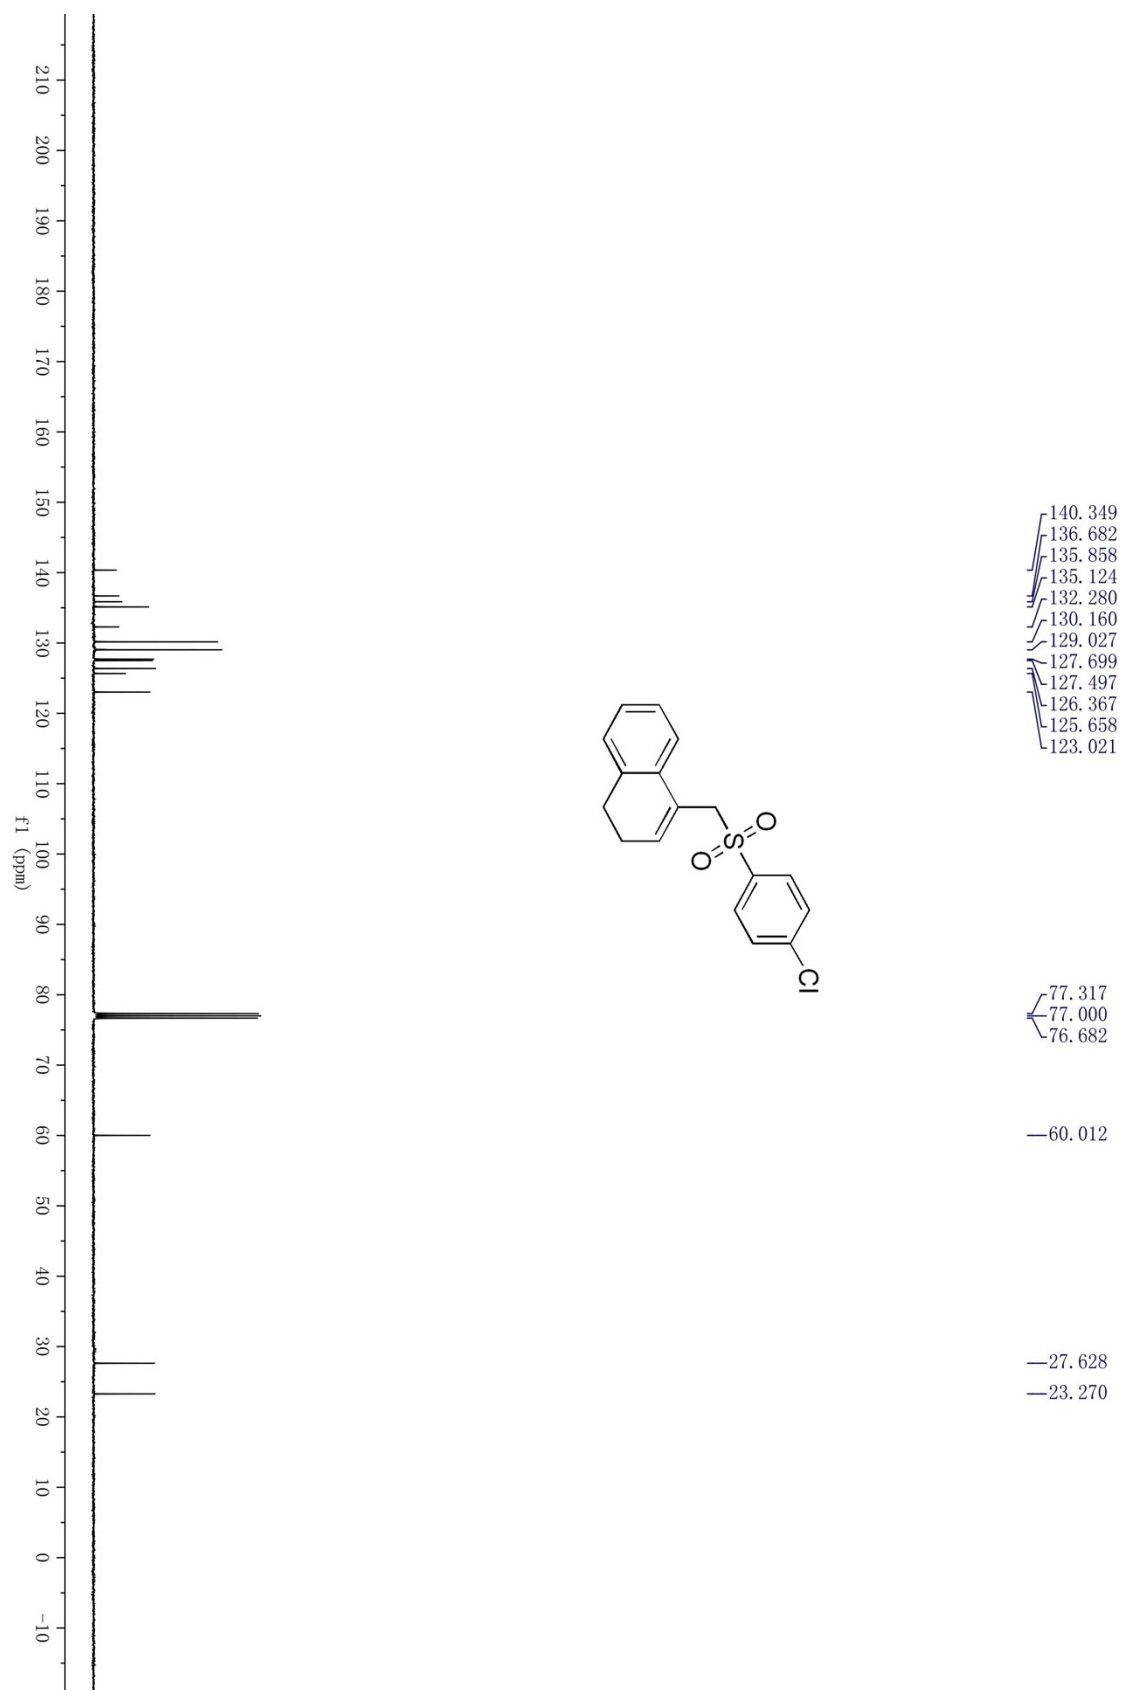

4-(((4-Bromophenyl)sulfonyl)methyl)-1,2-dihydronaphthalene (3ag)

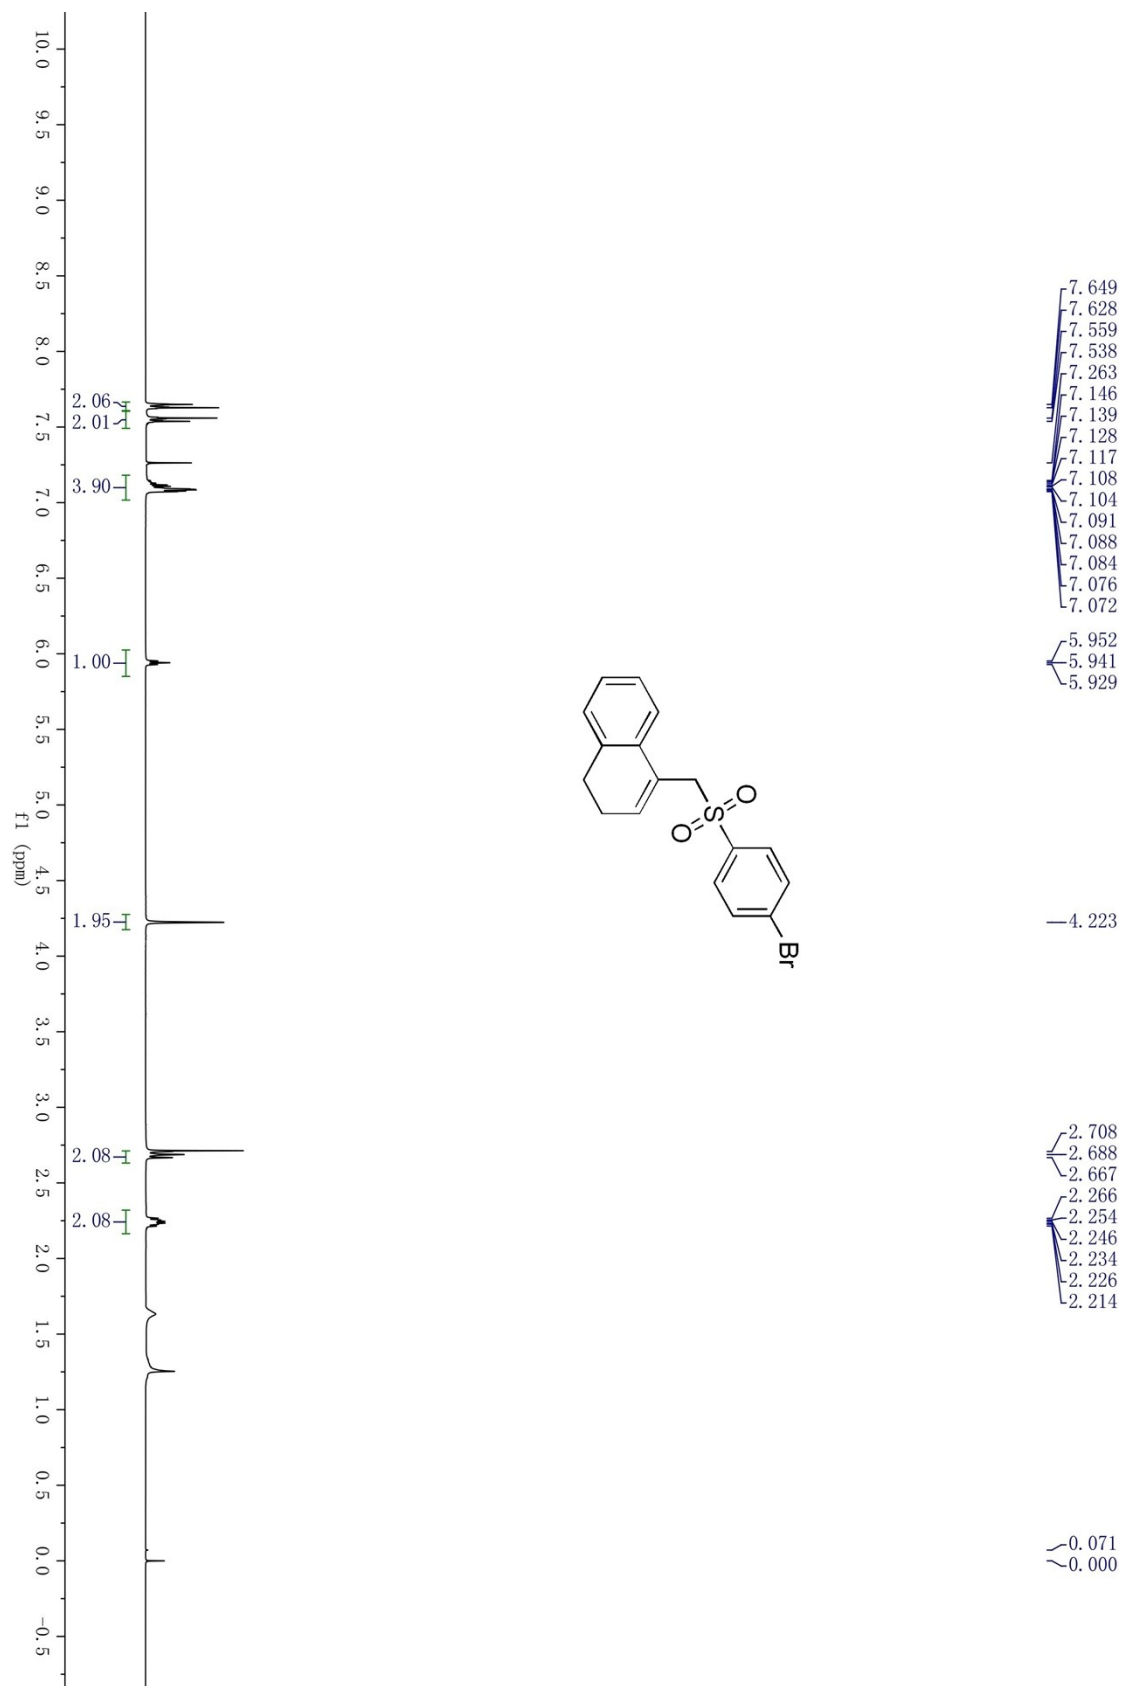

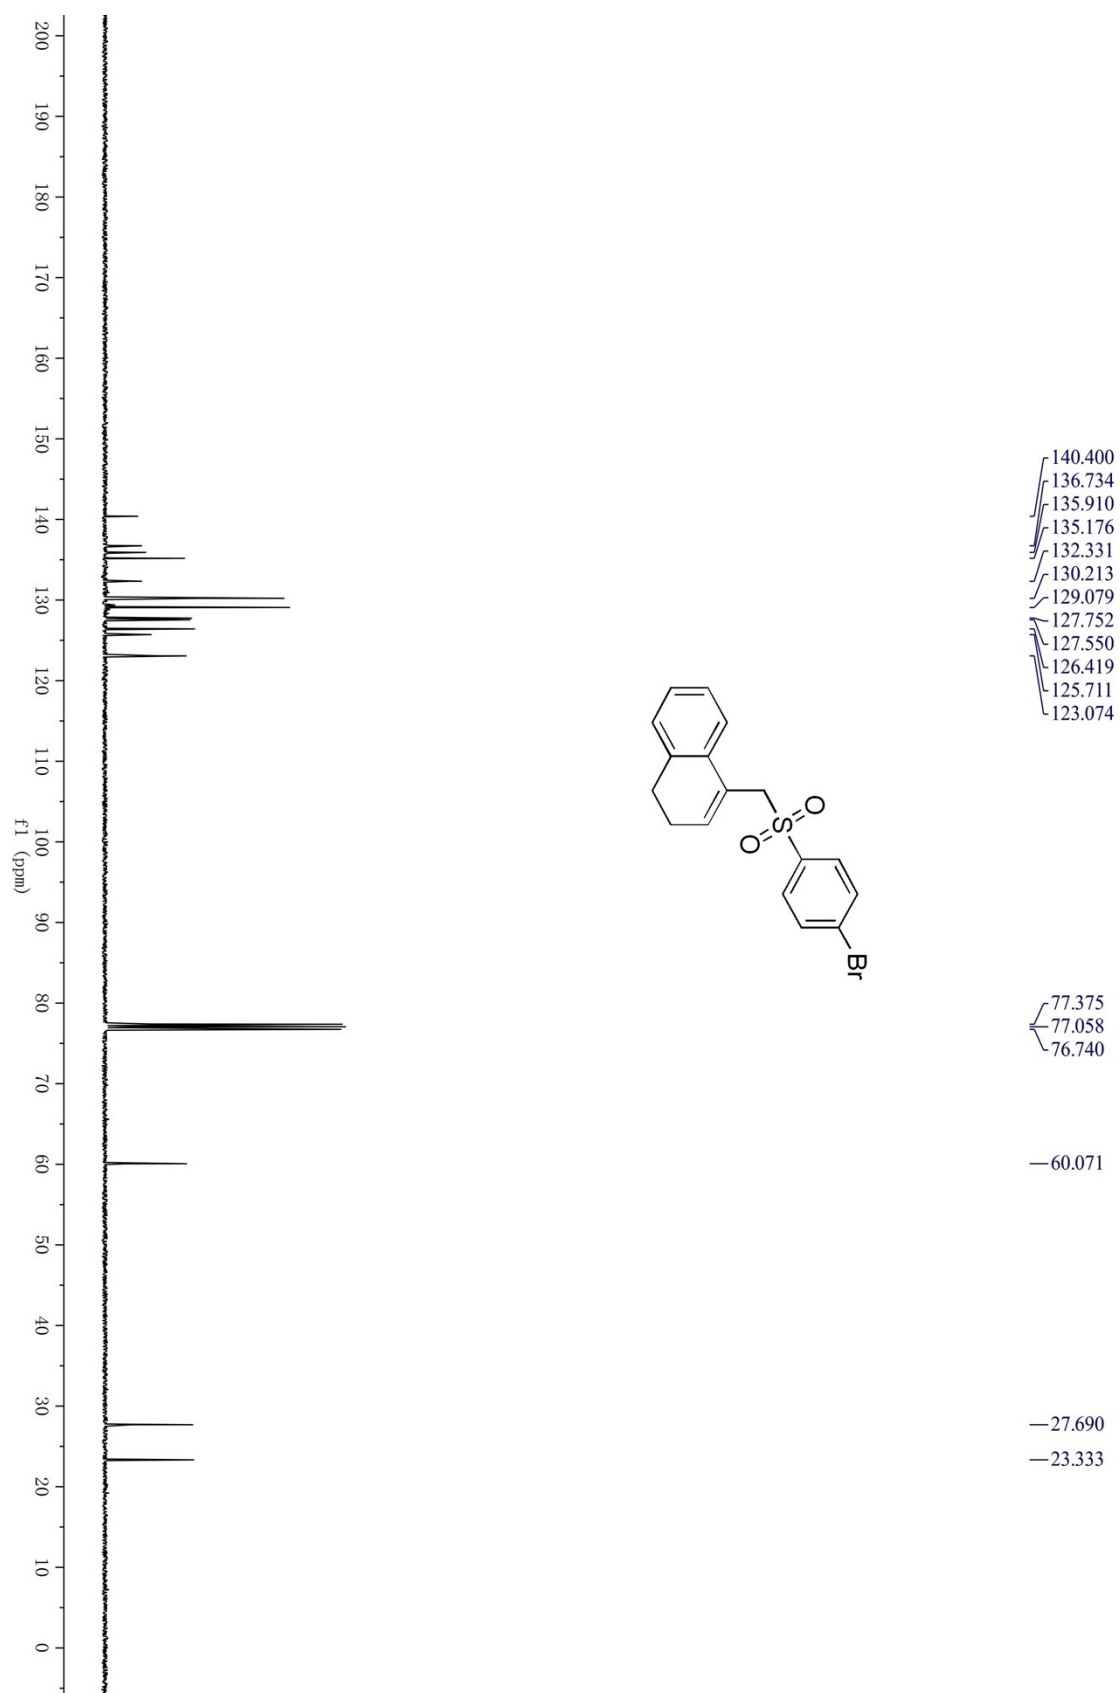

4-(((4-(Trifluoromethyl)phenyl)sulfonyl)methyl)-1,2-dihydronaphthalene (3ah)

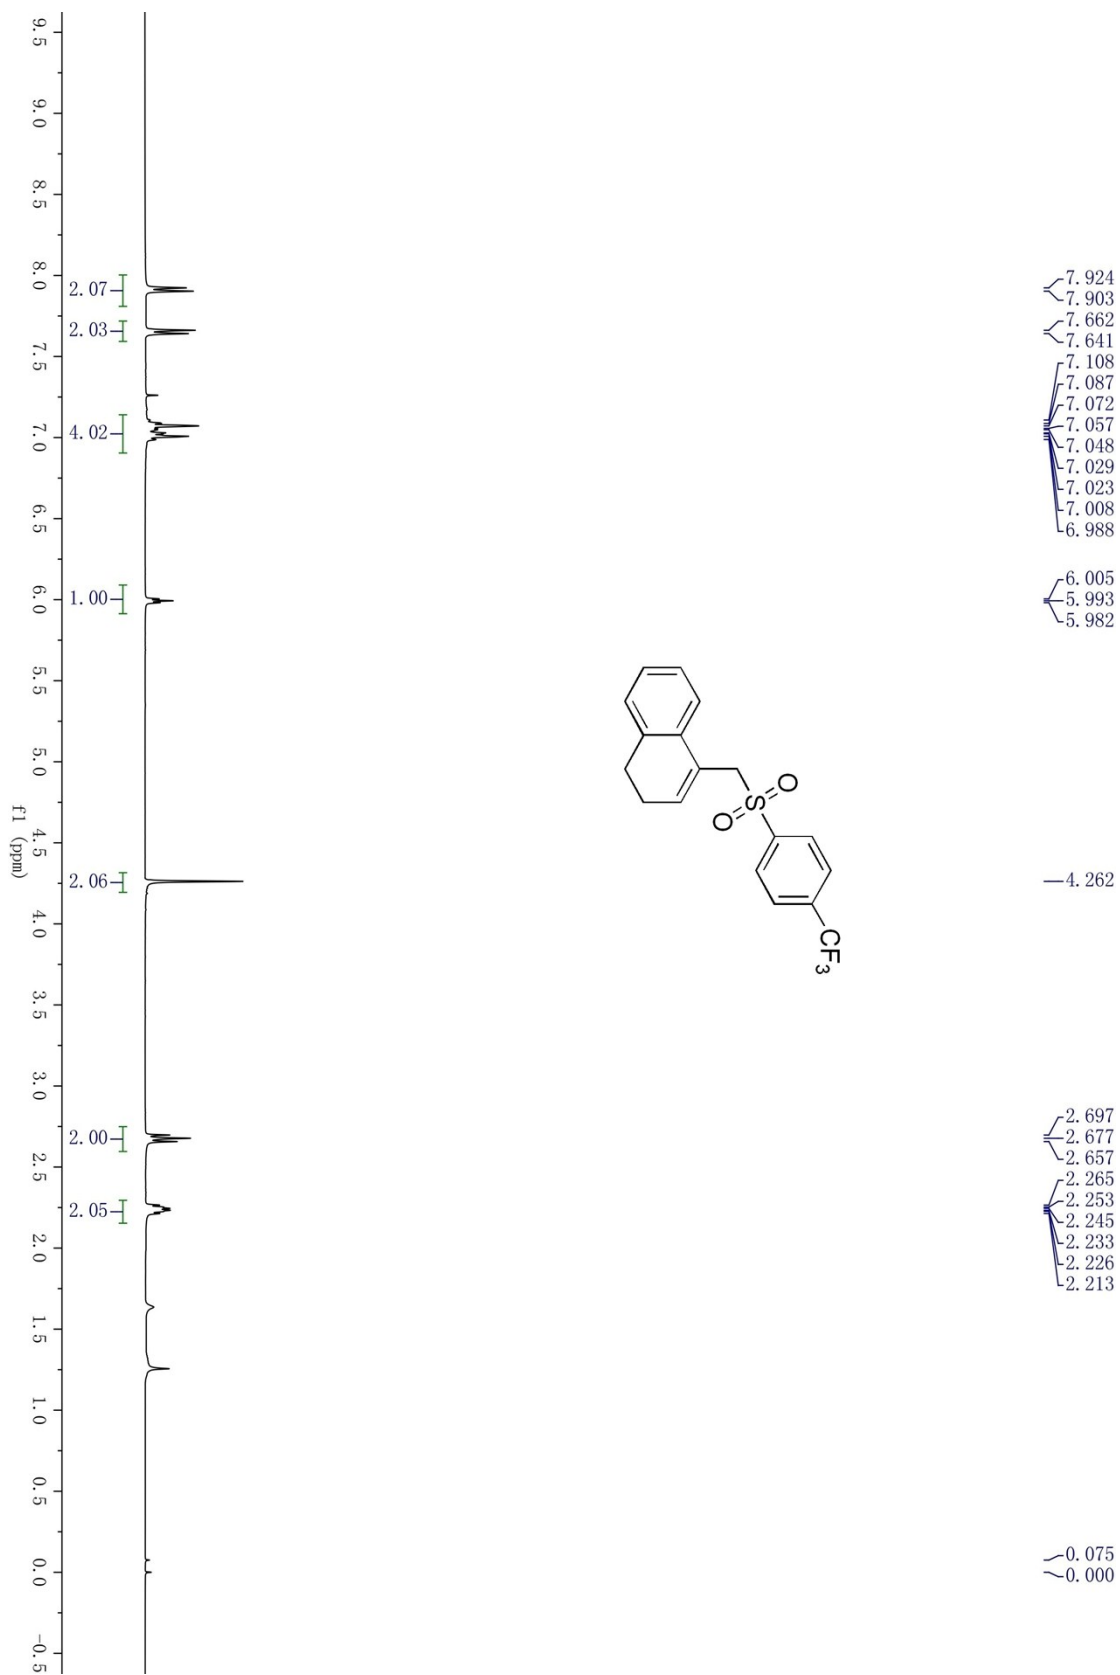

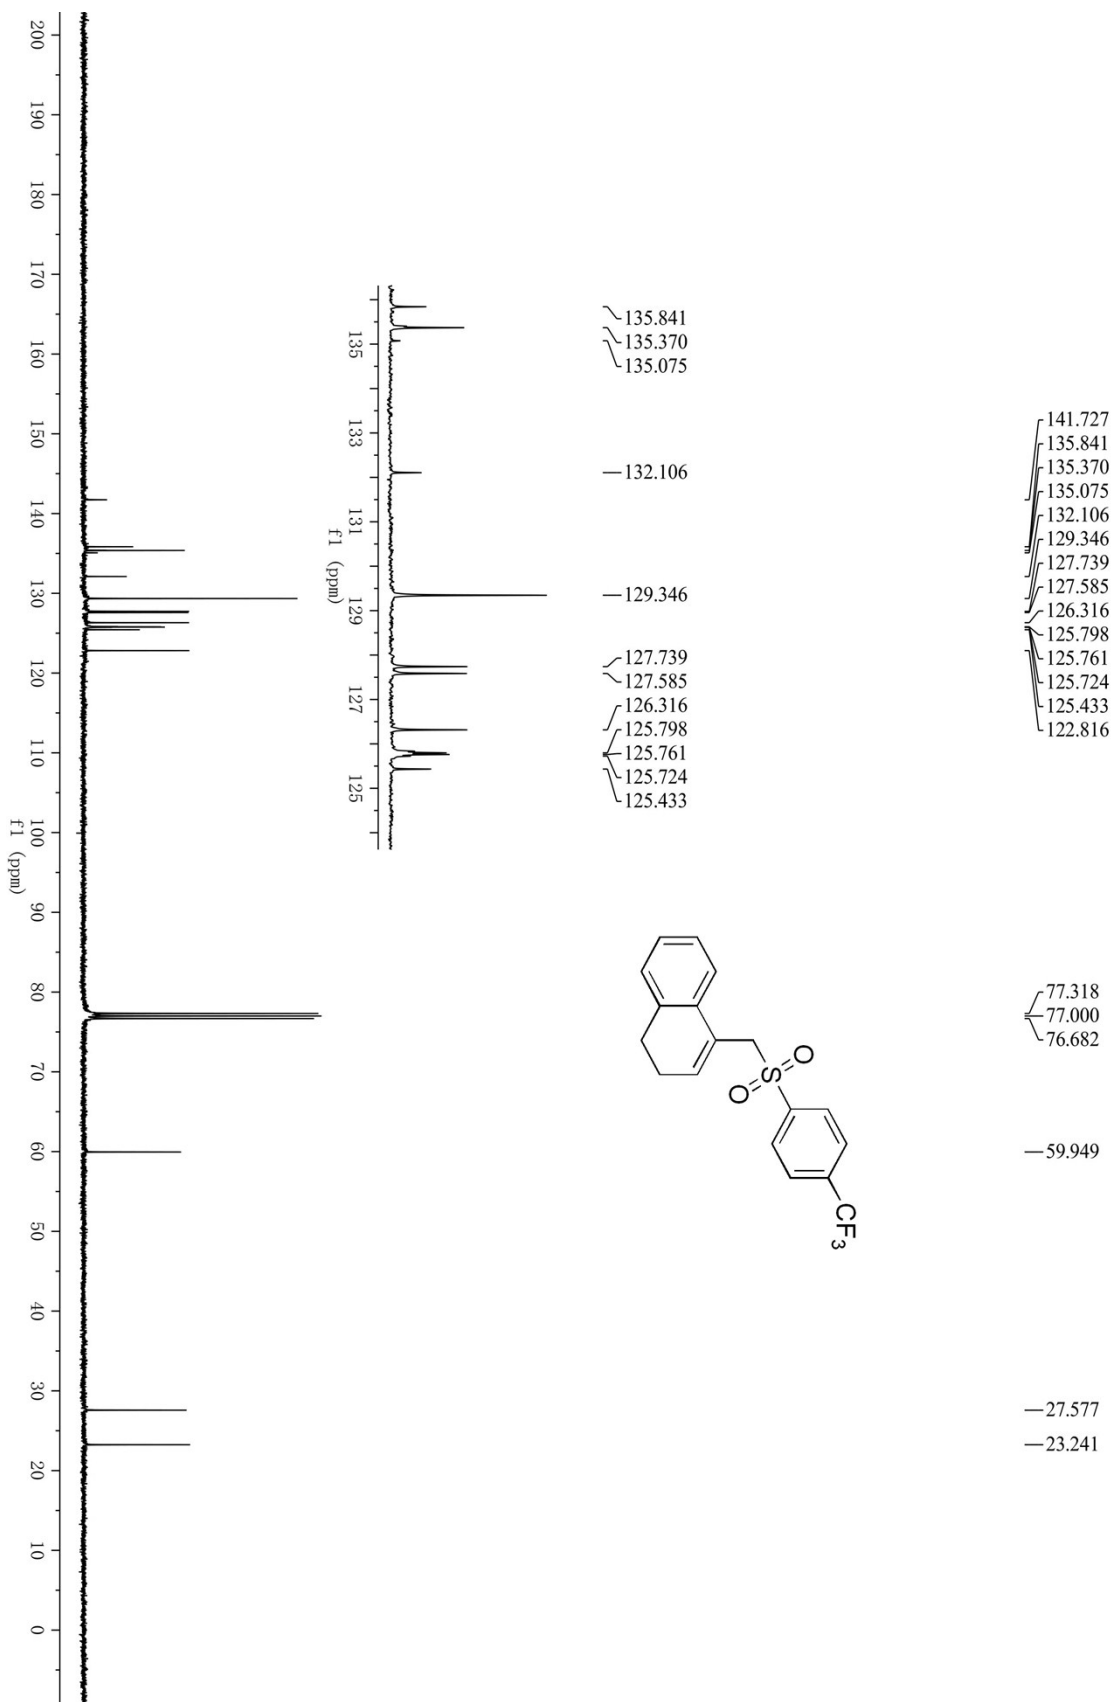

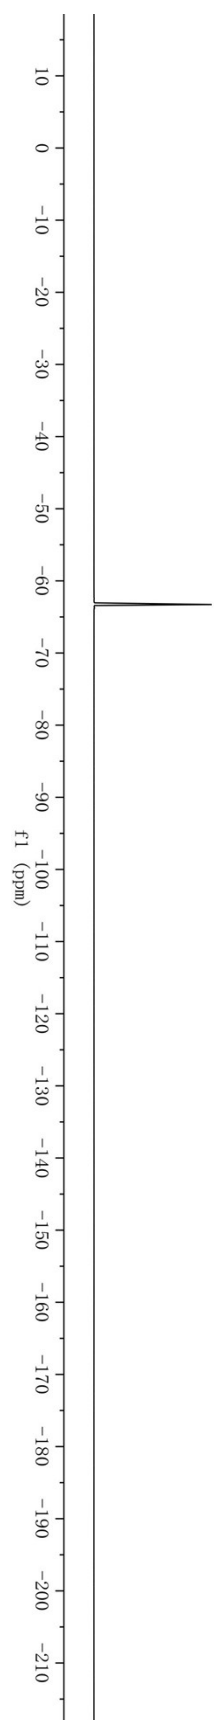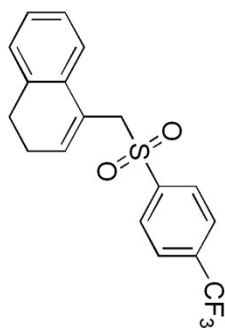

—63.282

1-4-(((3,4-Dihydronaphthalen-1-yl)methyl)sulfonyl)phenyl)ethanone (3ai)

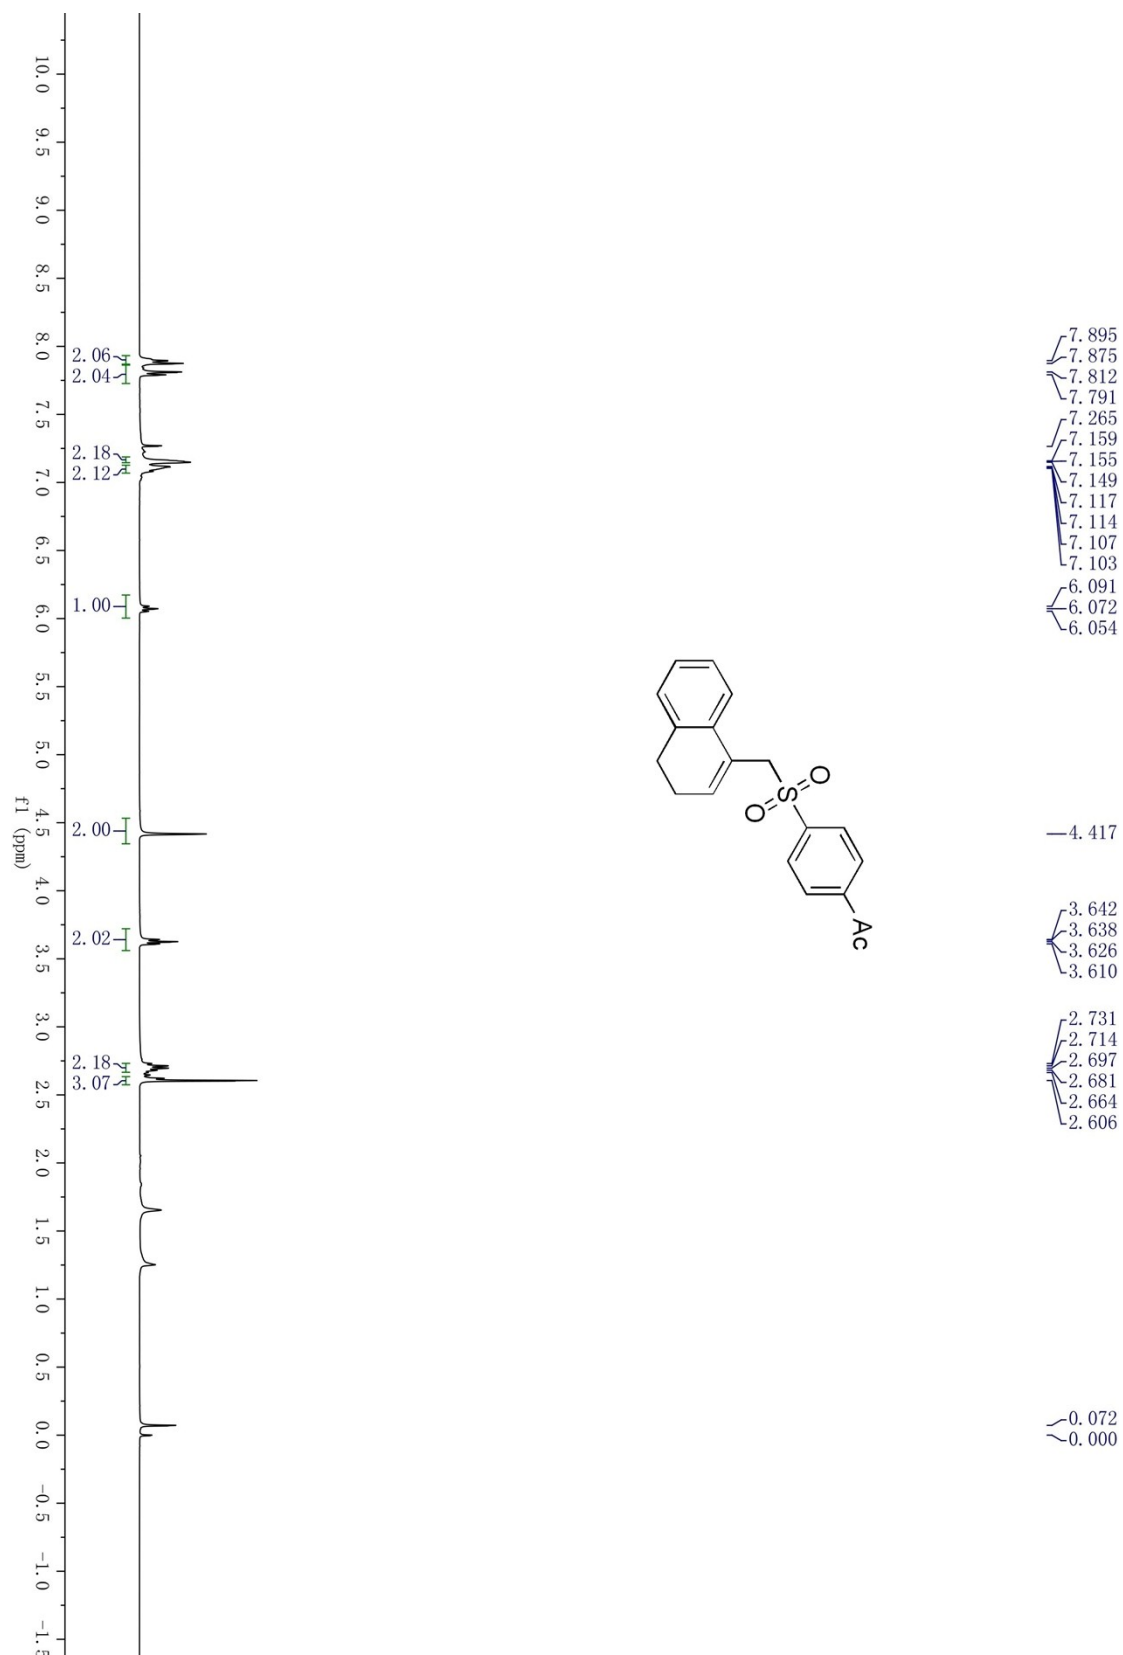

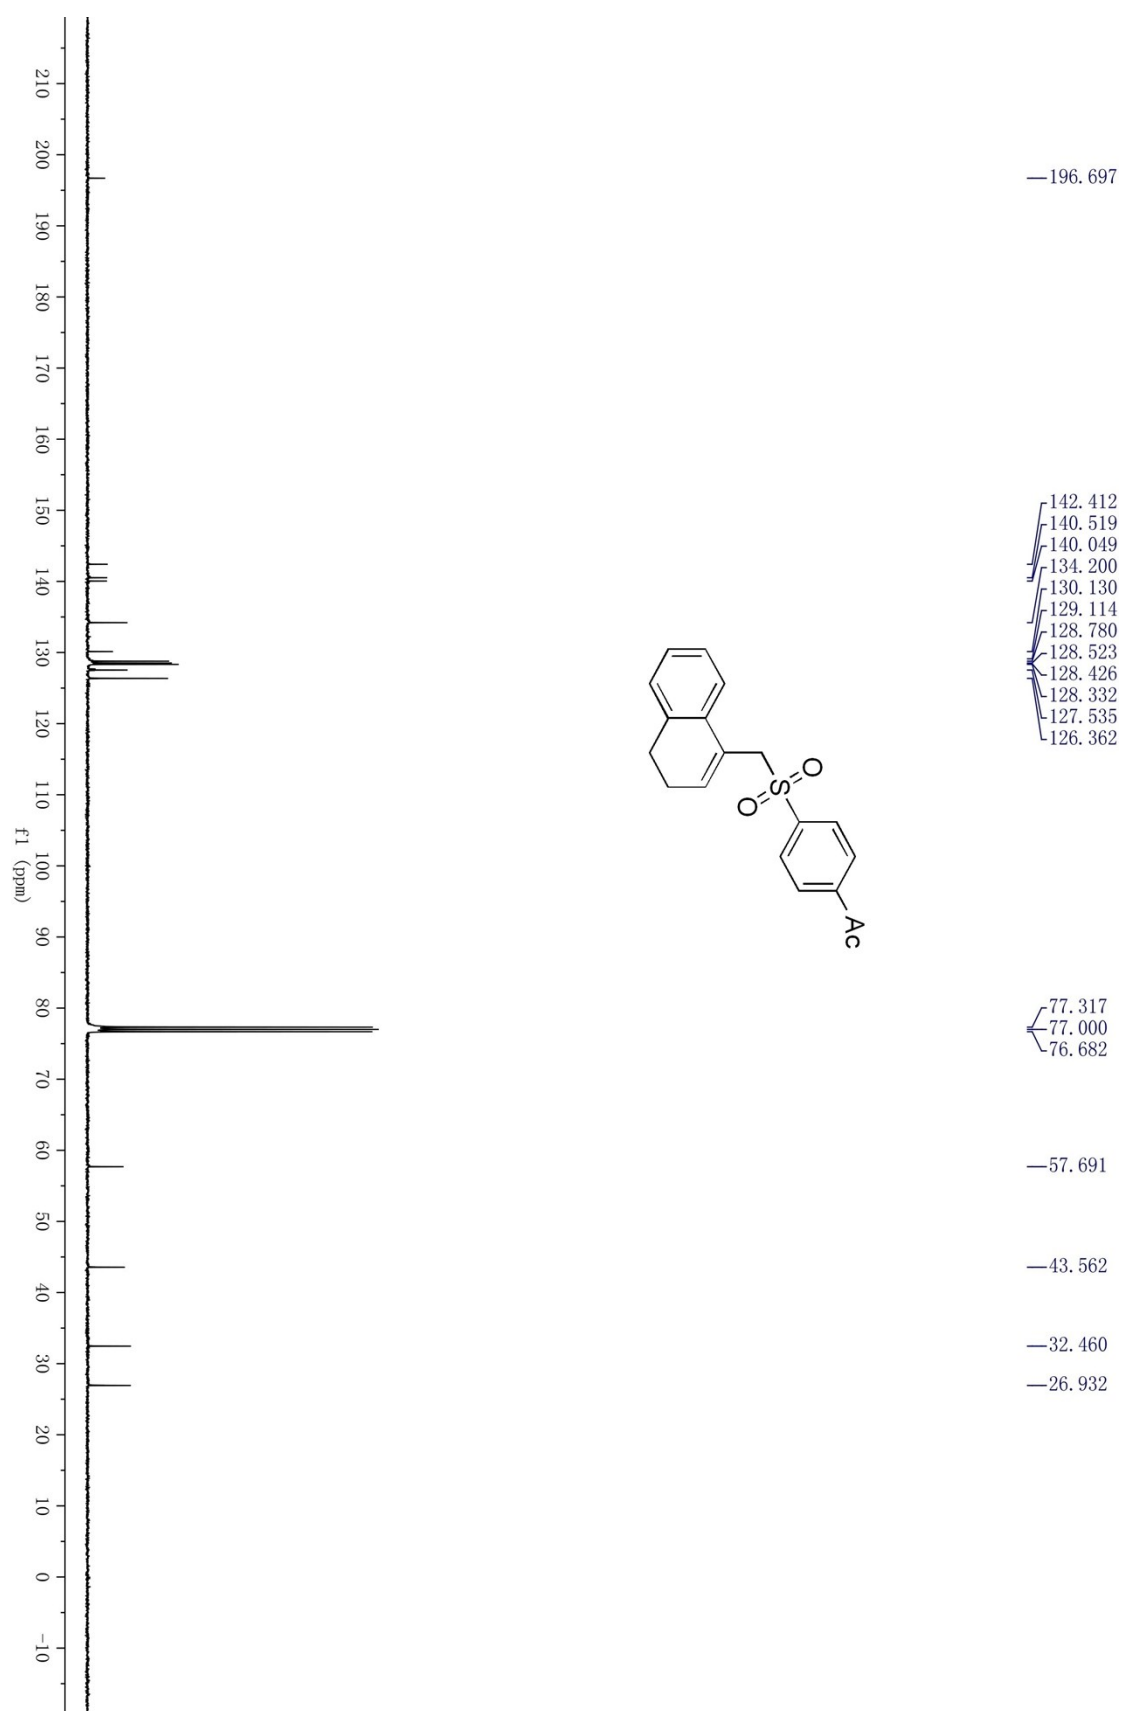



4-(((4-Nitrophenyl)sulfonyl)methyl)-1,2-dihydronaphthalene (3aj)

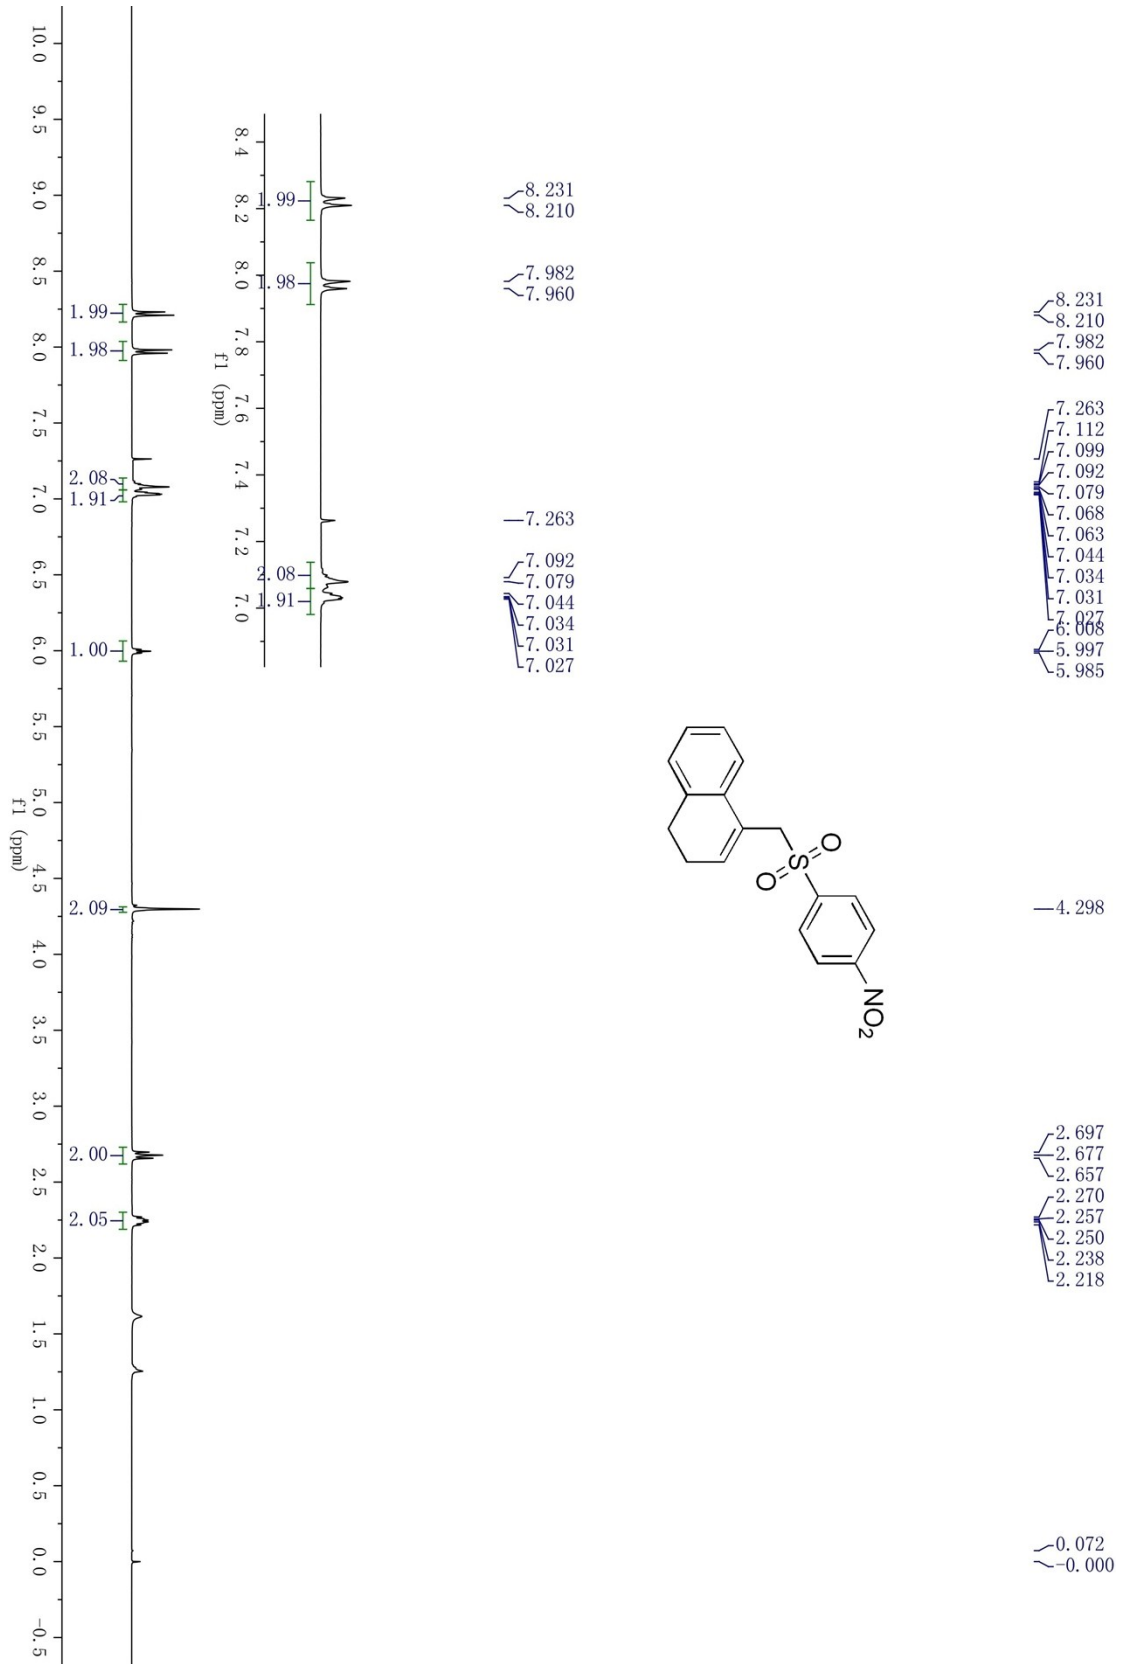

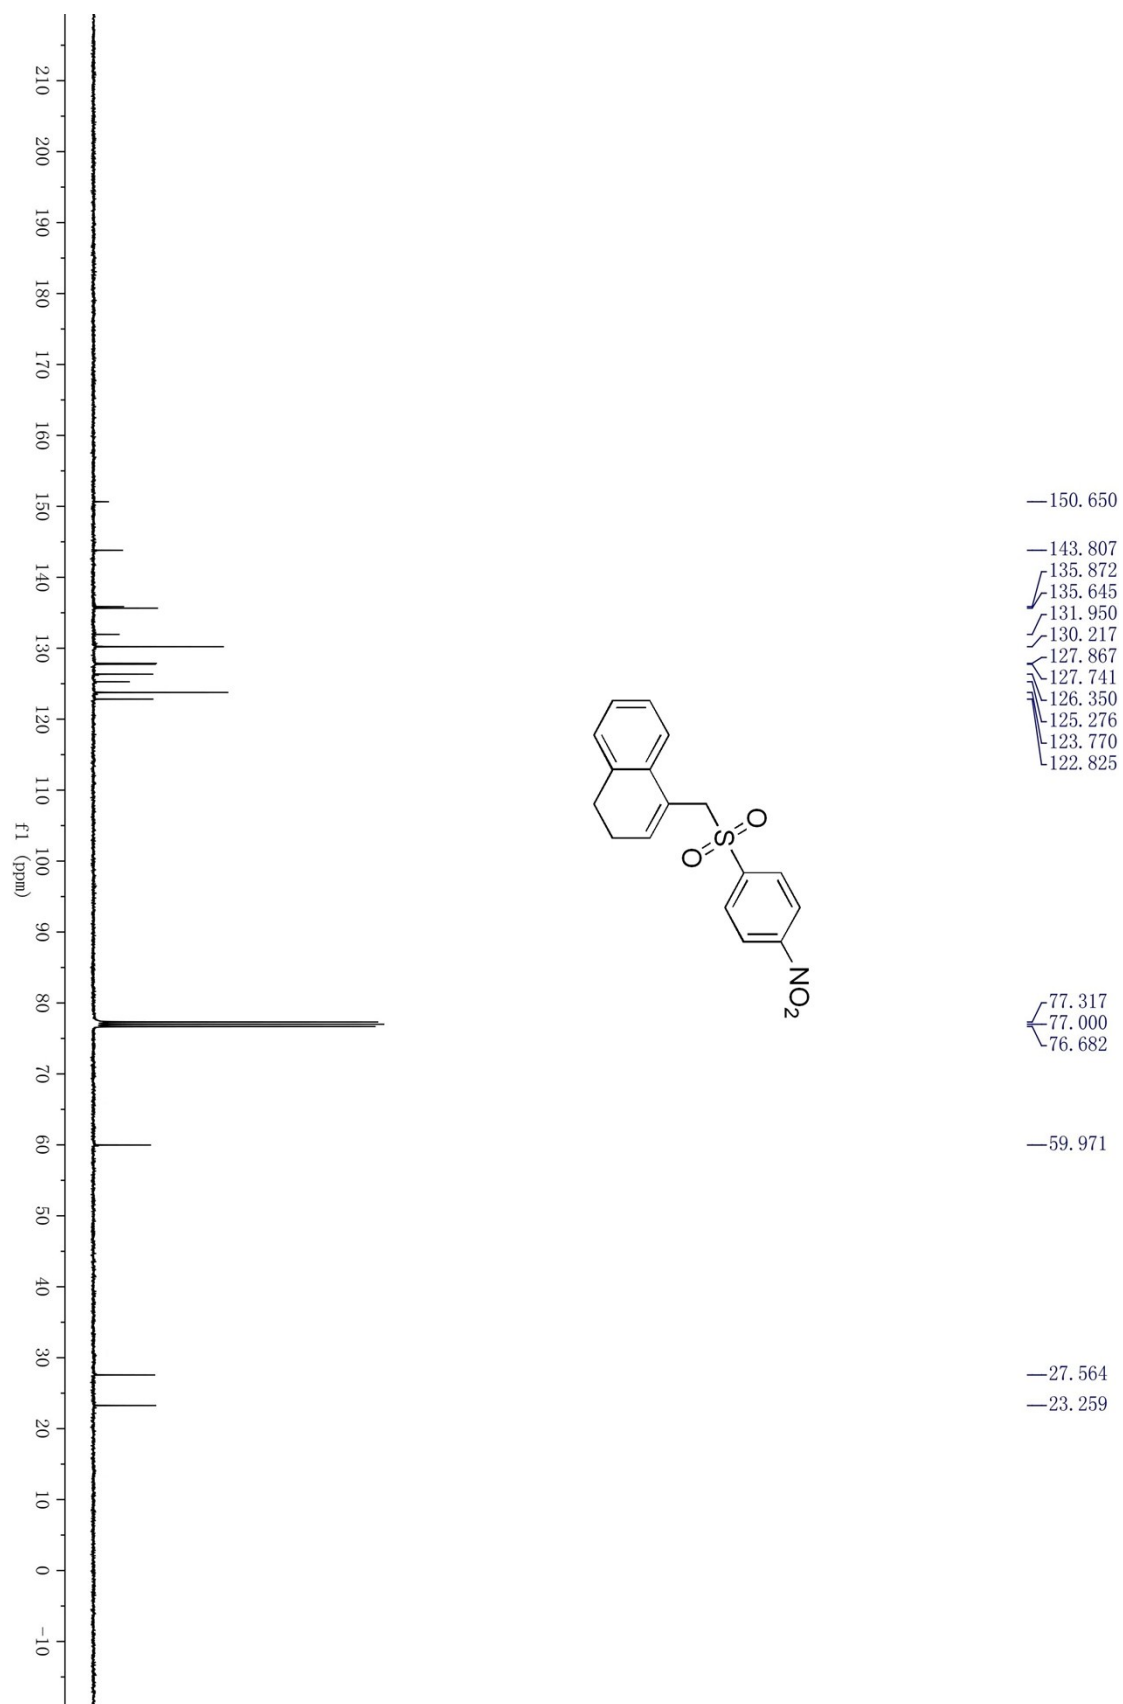

4-(*m*-Tolylsulfonyl)methyl)-1,2-dihydronaphthalene (3ak)

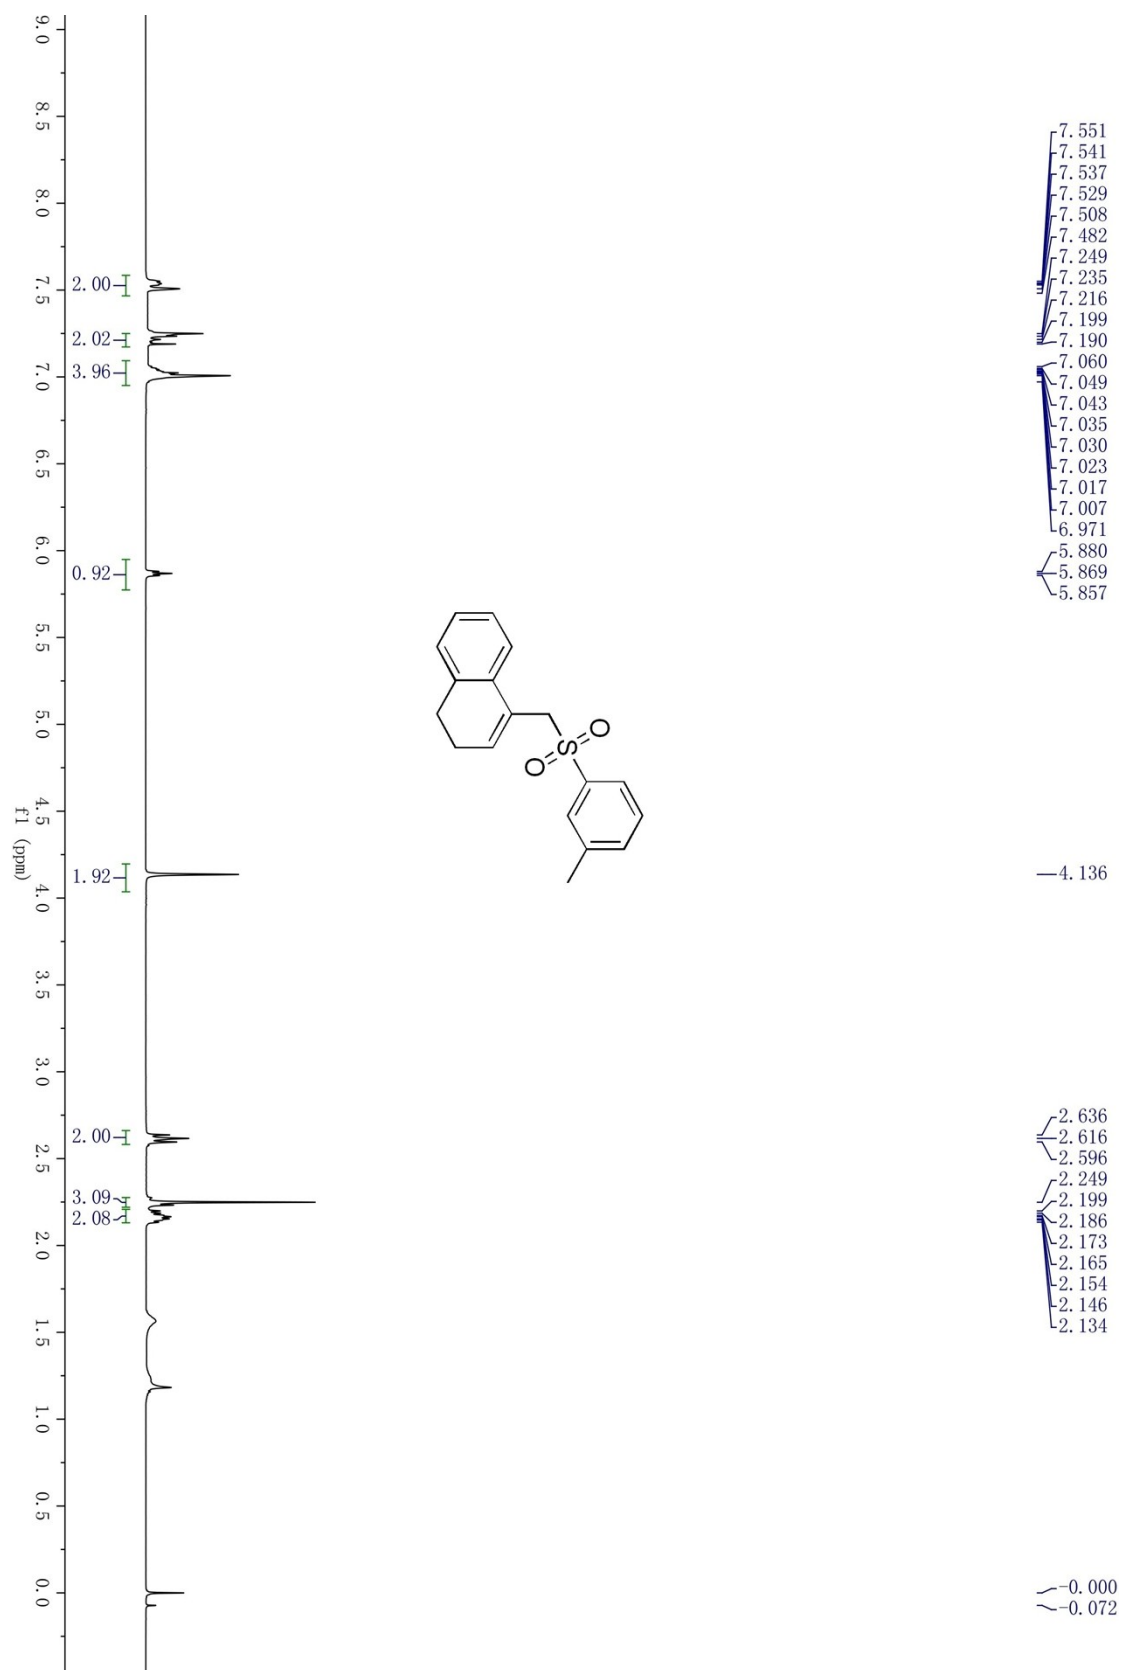

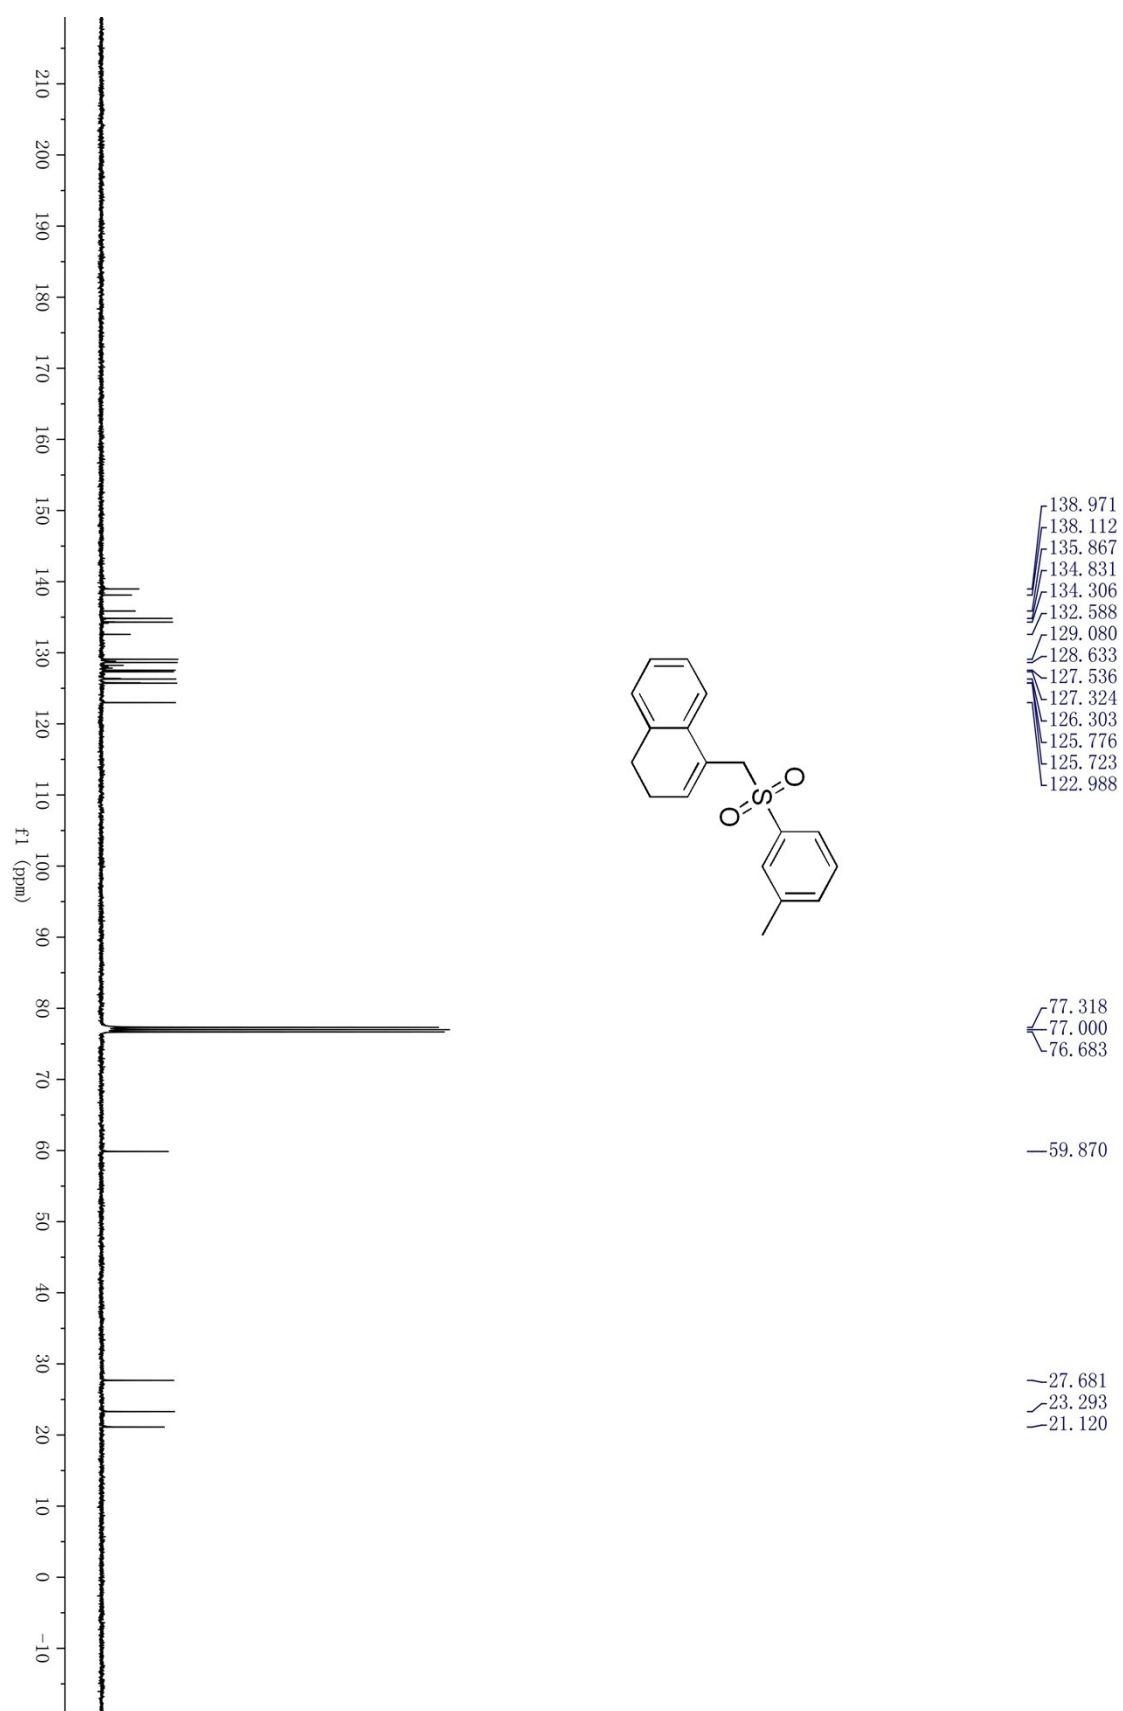

4-(*o*-Tolylsulfonyl)methyl-1,2-dihydronaphthalene (3a)

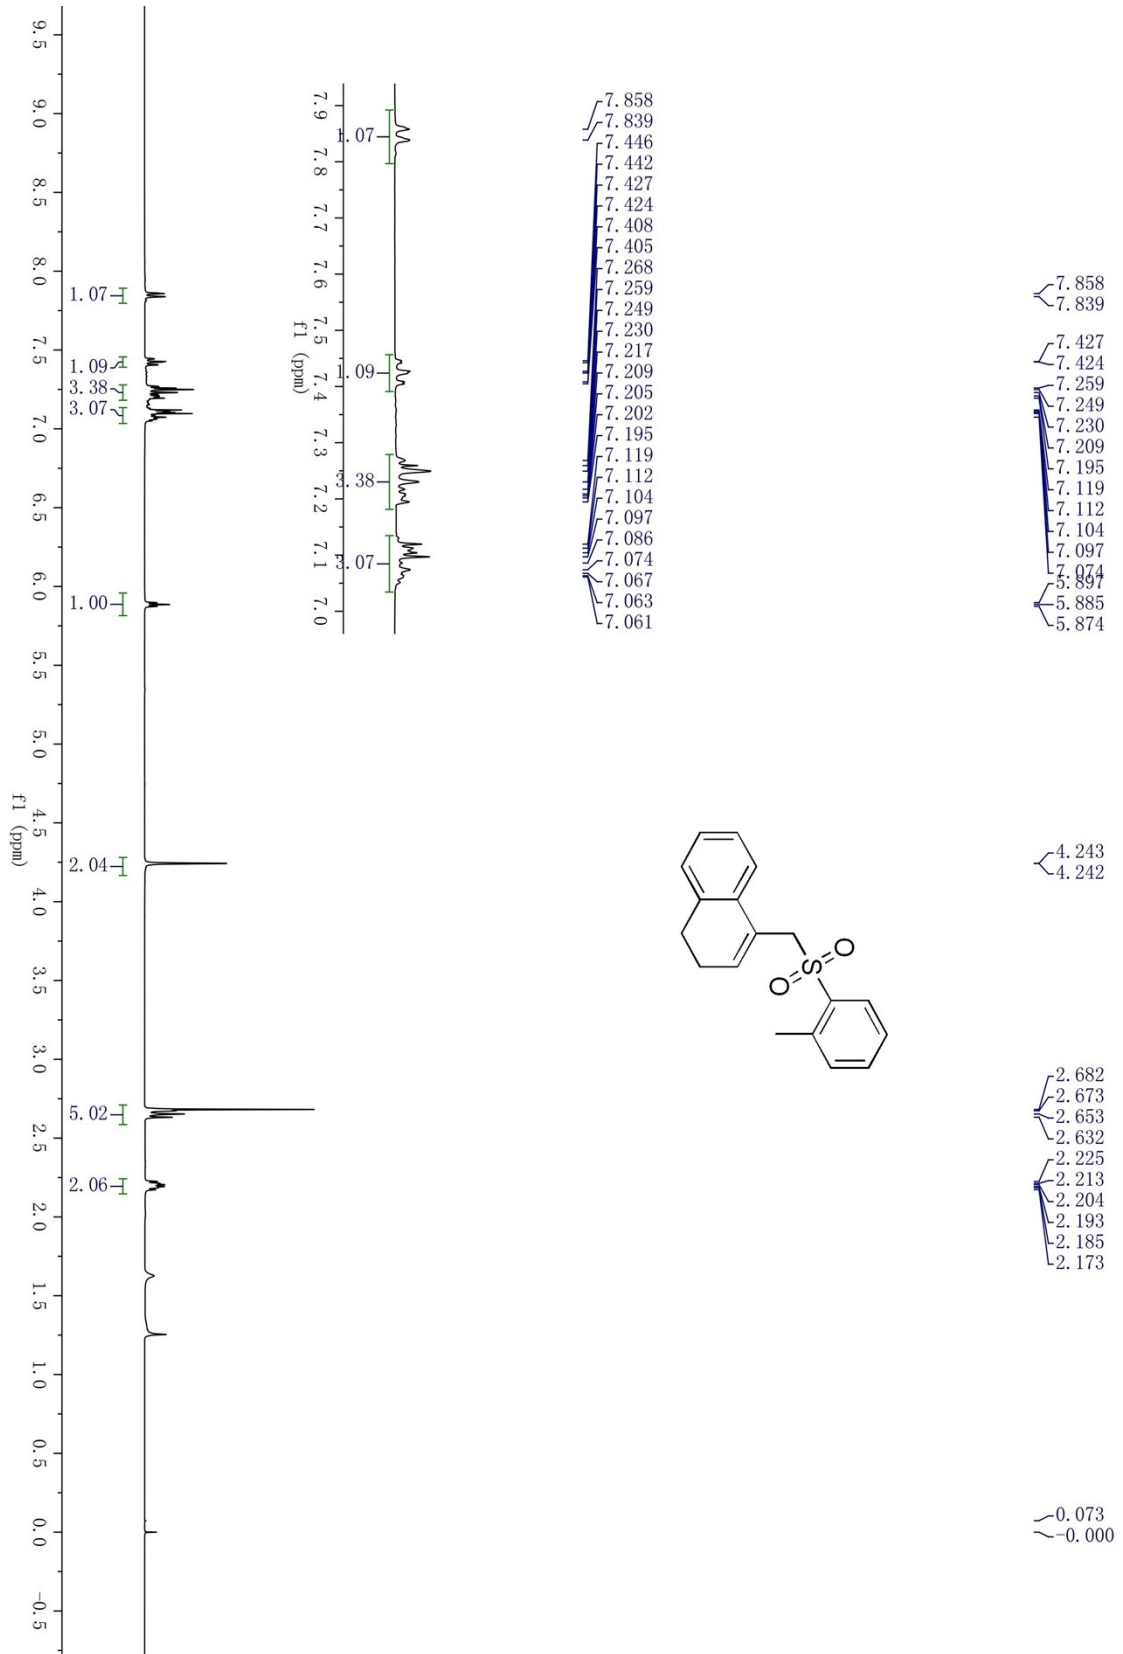

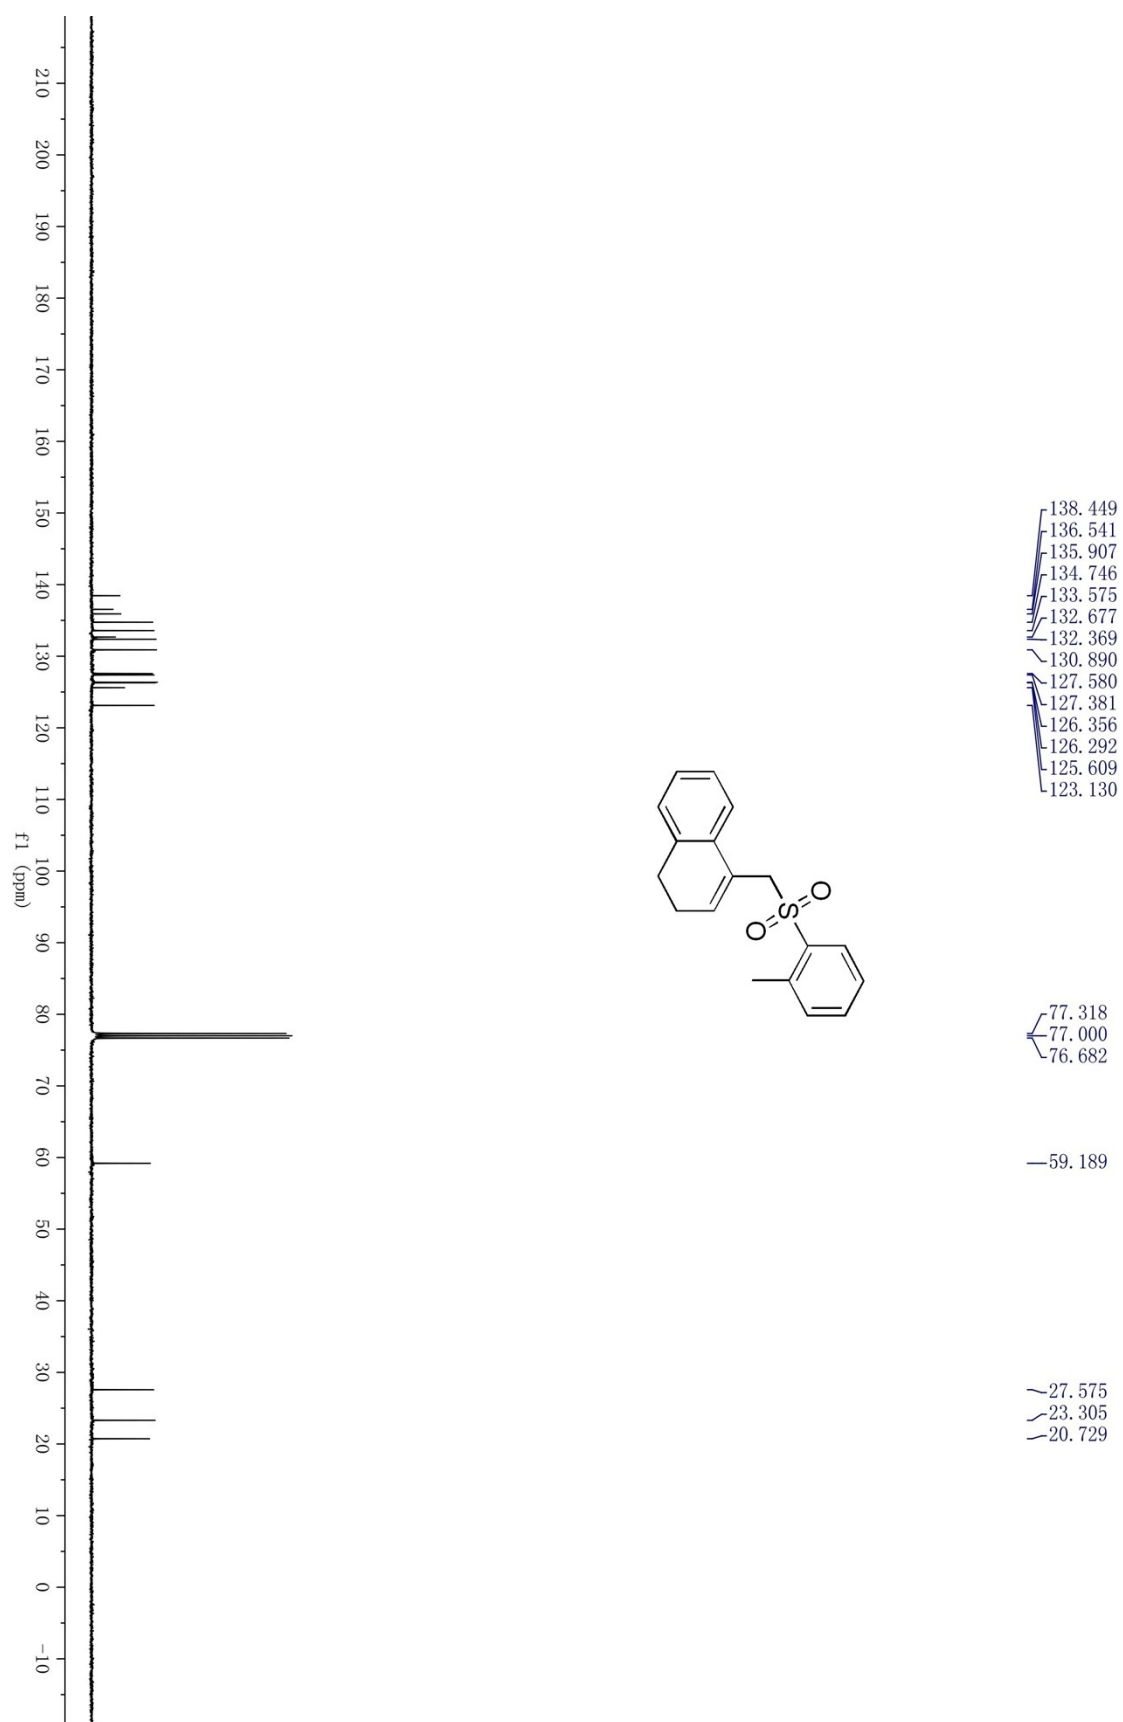

2-(((3,4-Dihydronaphthalen-1-yl)methyl)sulfonyl)benzotrile (3am)

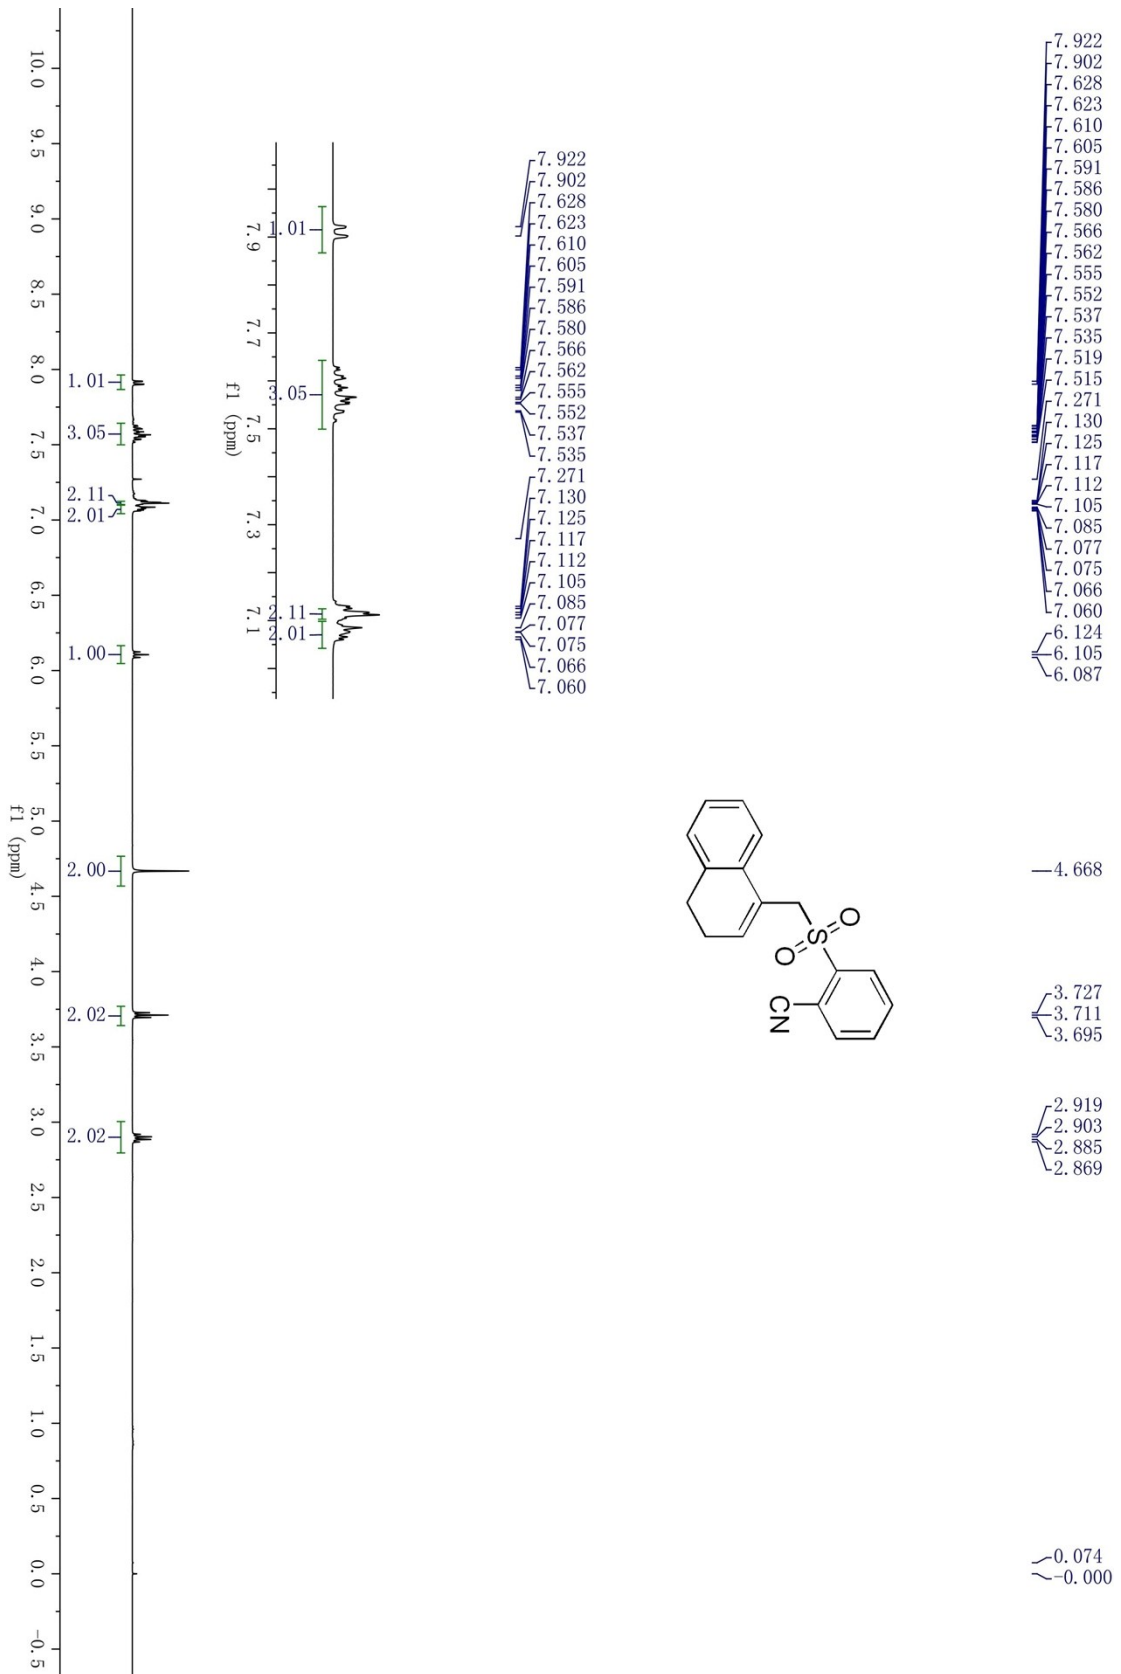

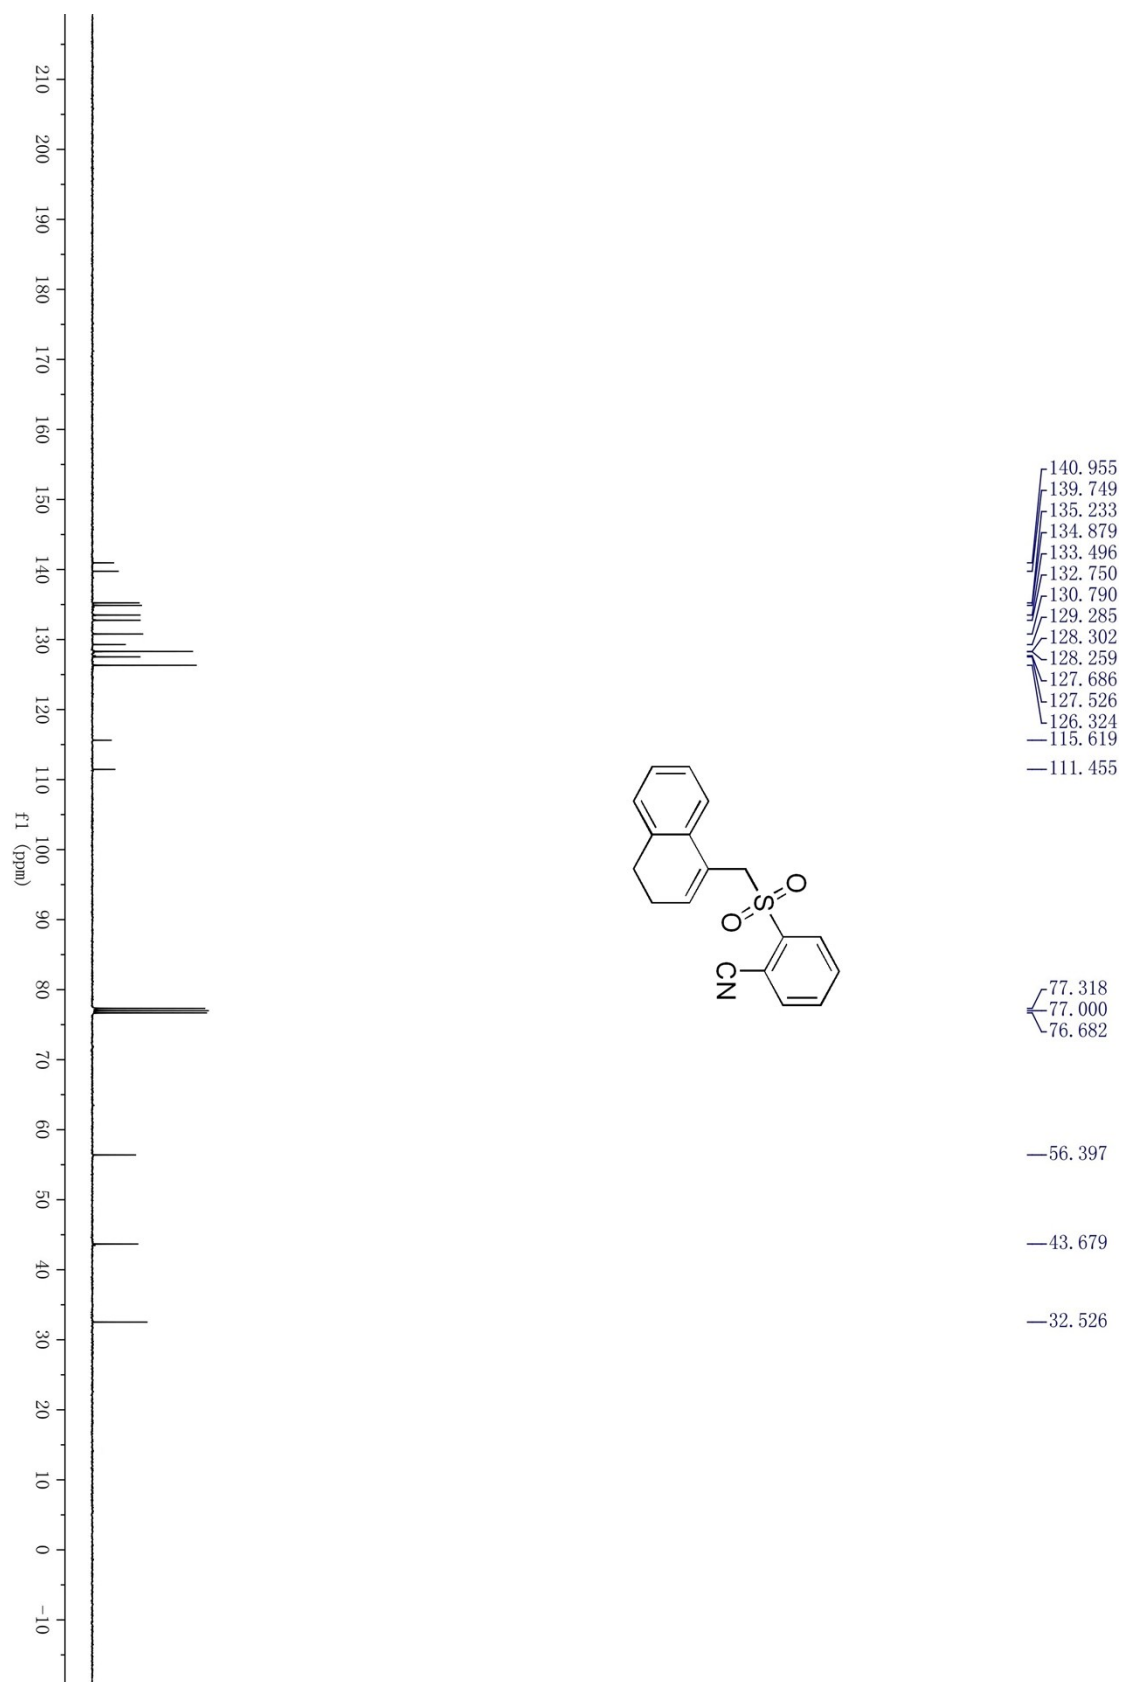



4-(((2-Nitrophenyl)sulfonyl)methyl)-1,2-dihydronaphthalene (3an)

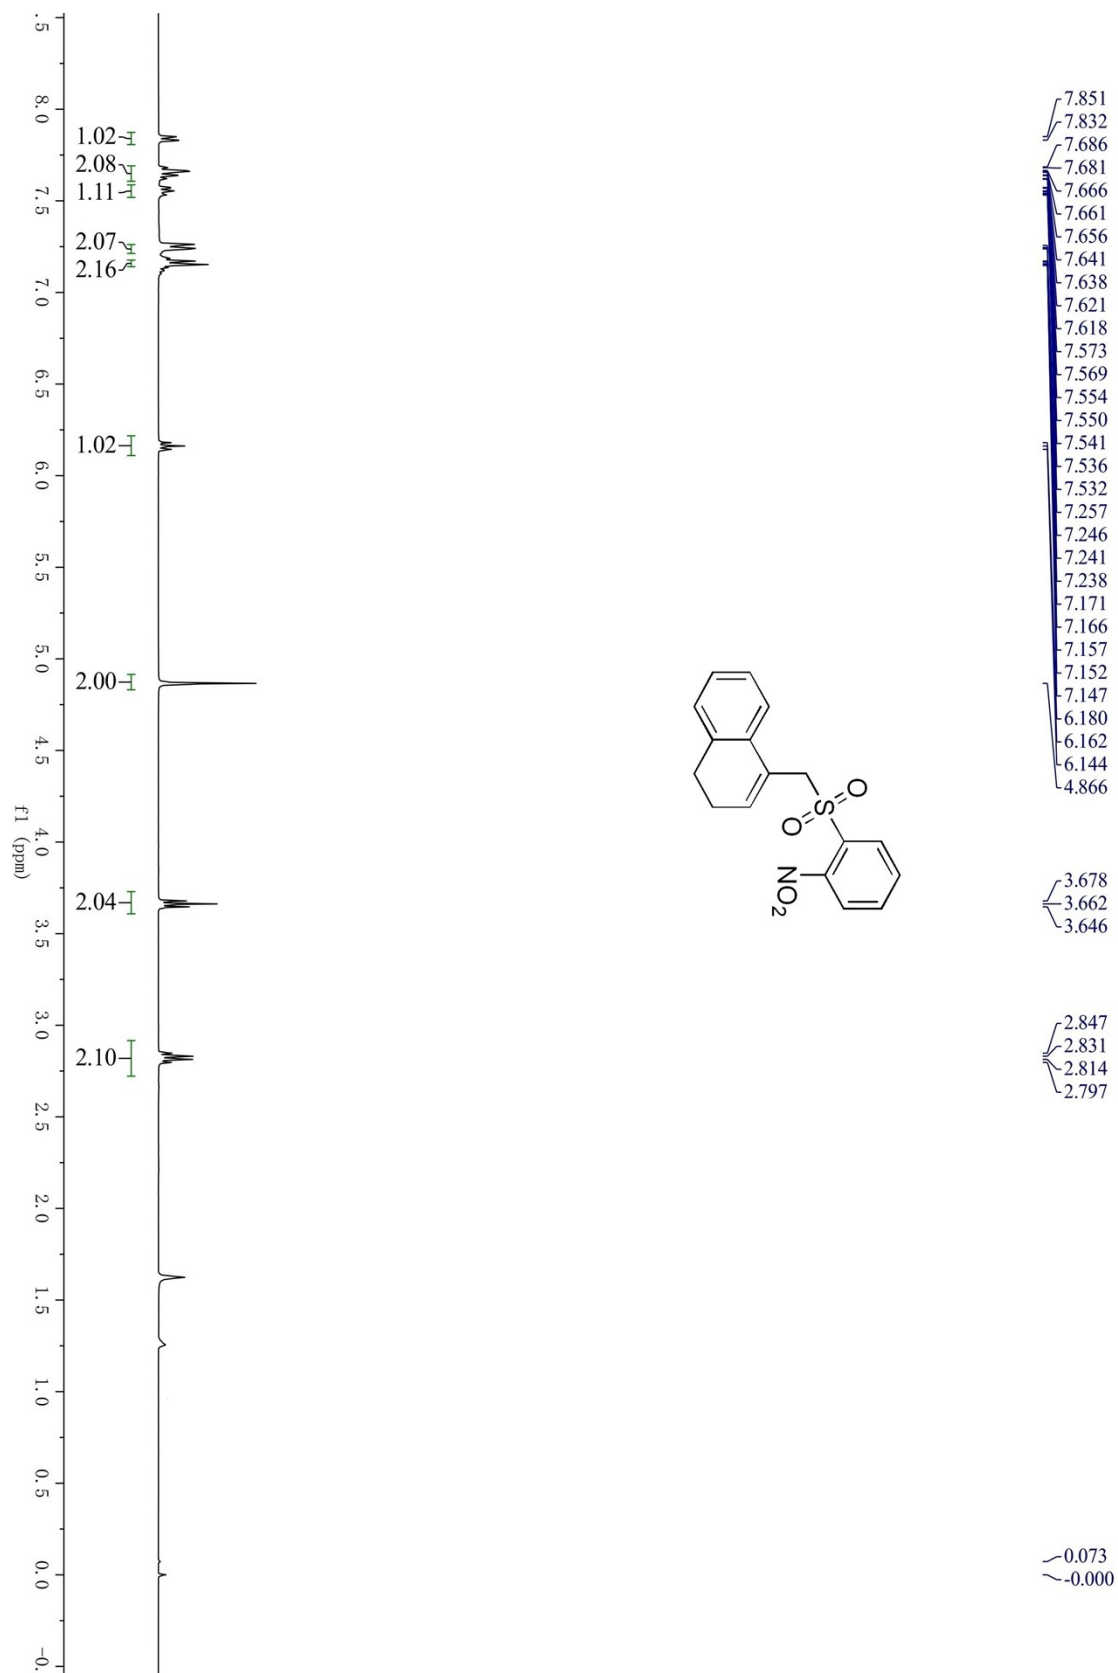

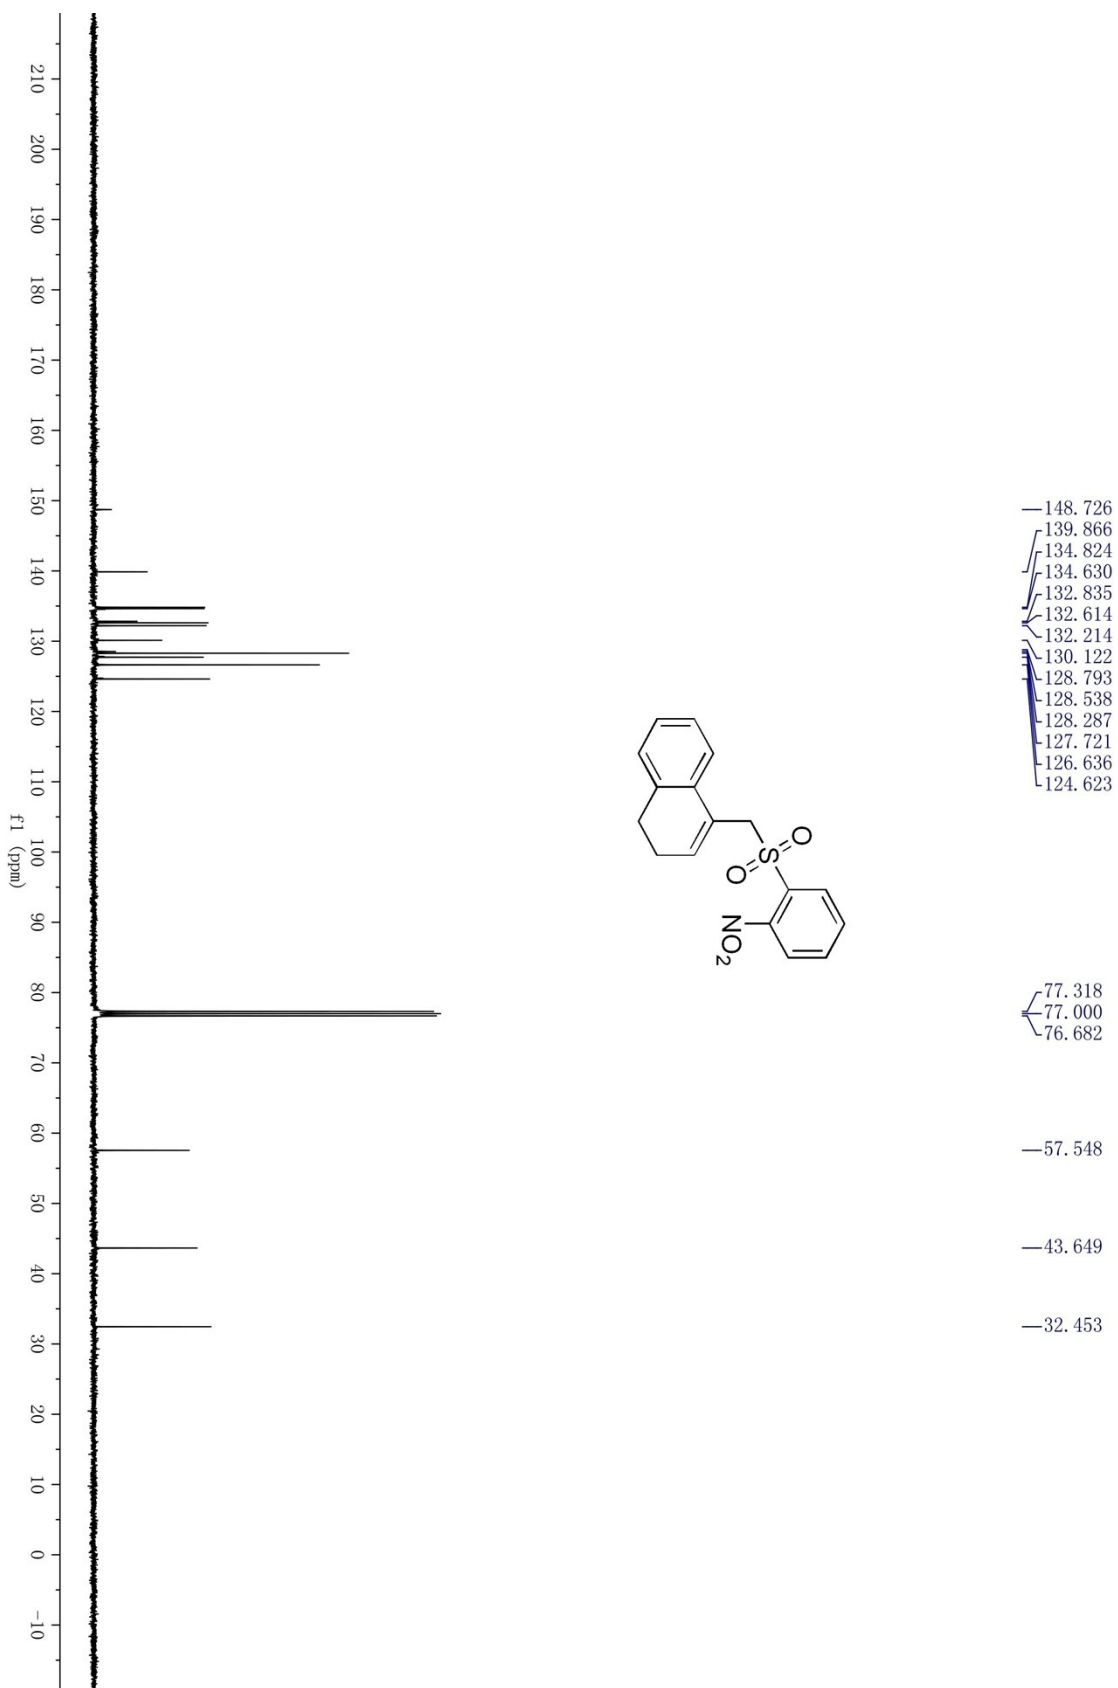

4-((Mesitylsulfonyl)methyl)-1,2-dihydronaphthalene (3ao)

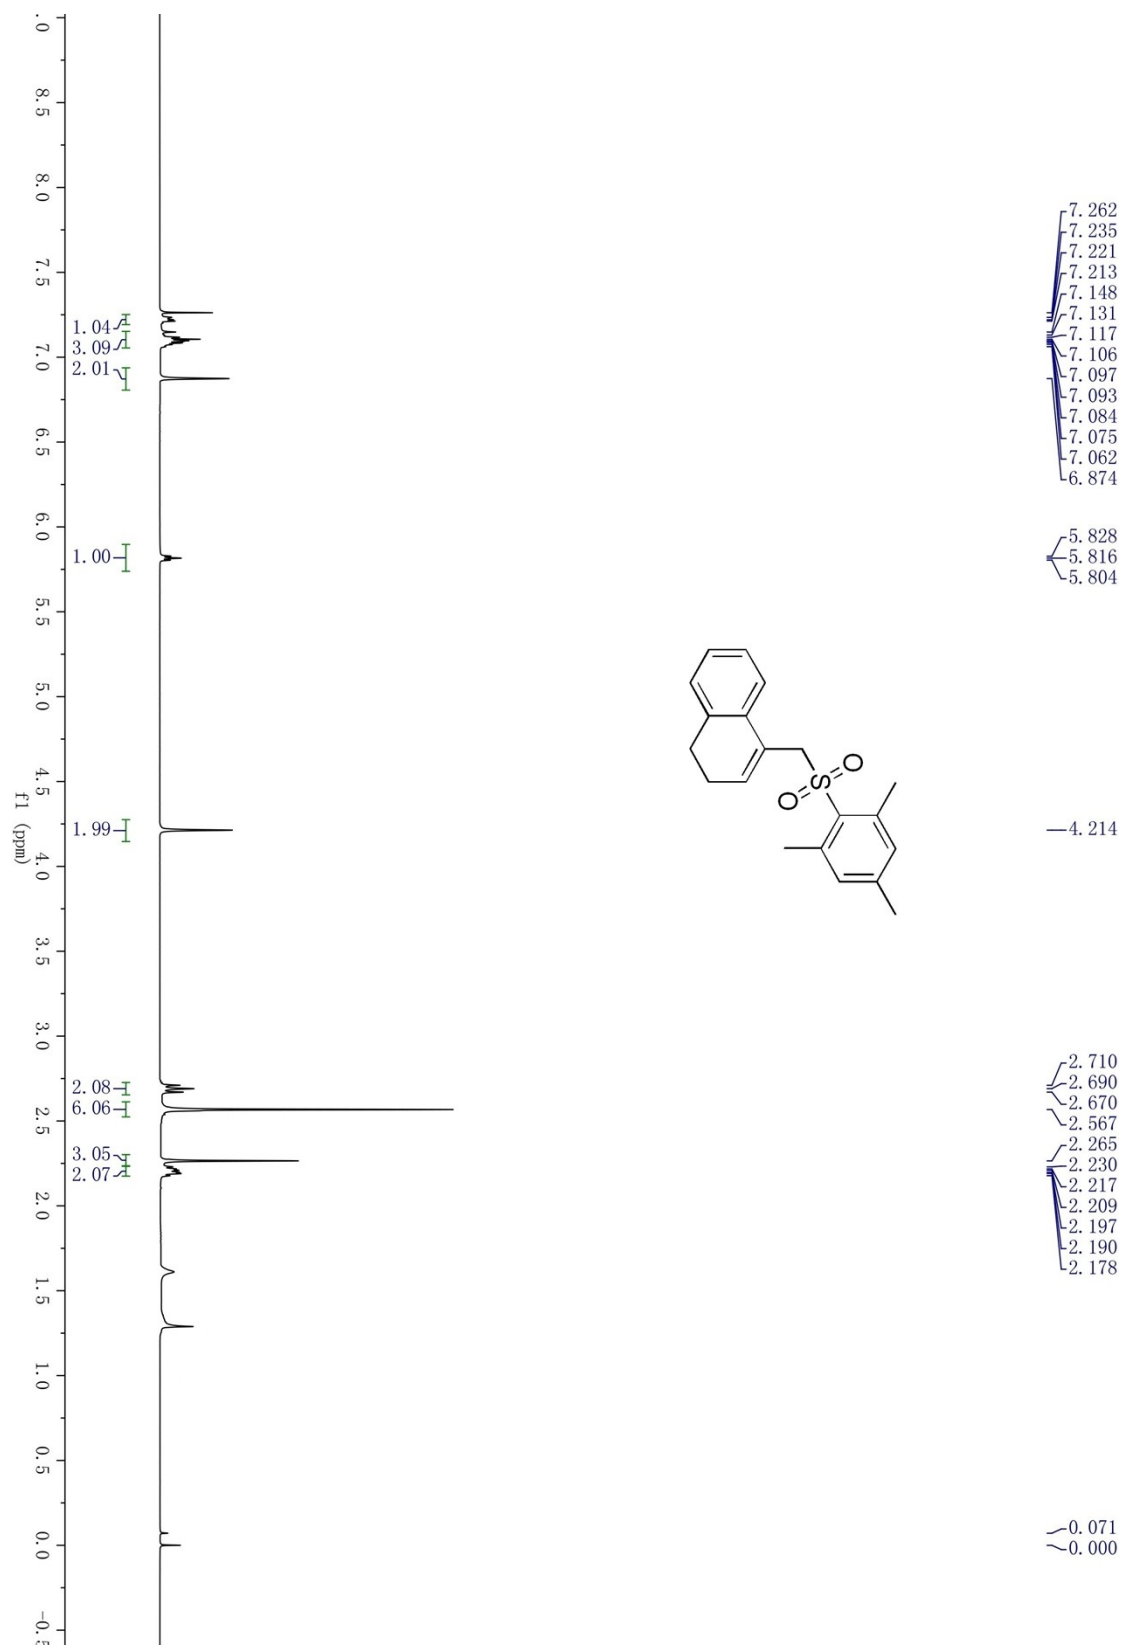

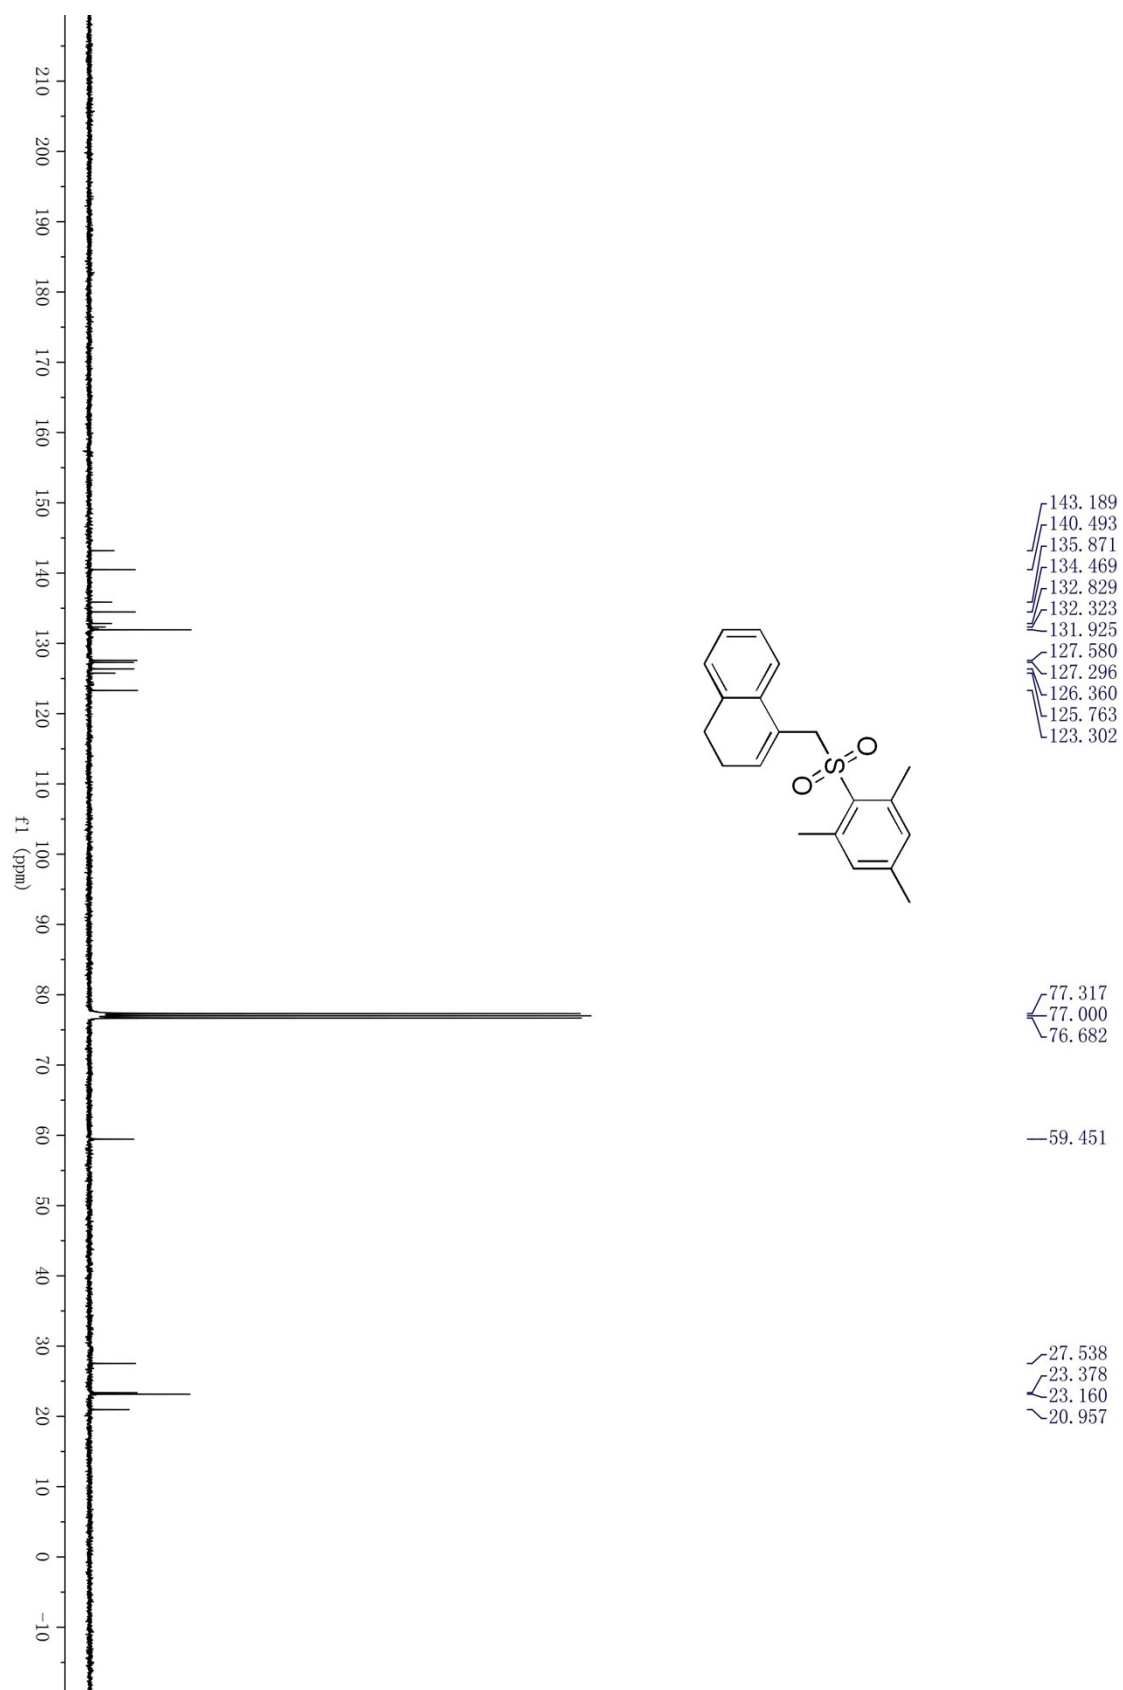



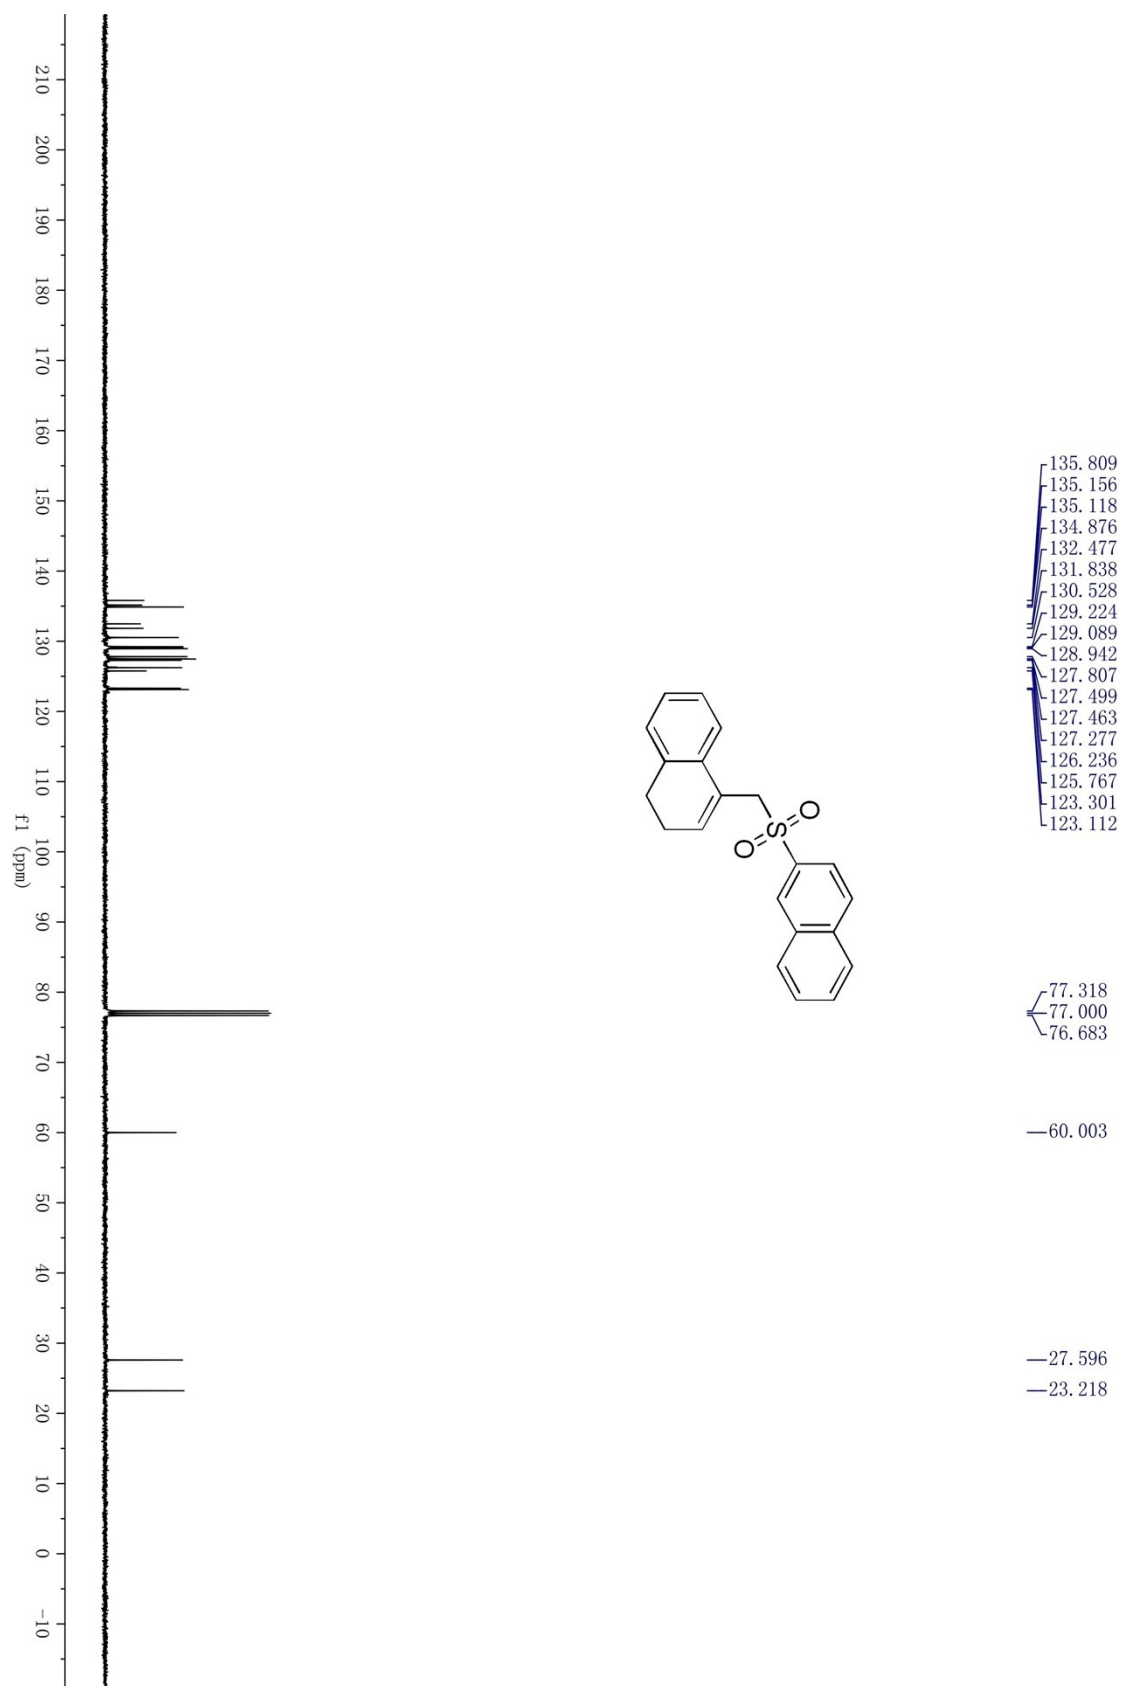

2-((3,4-Dihydronaphthalen-1-yl)methyl)sulfonylthiophene (3aq)

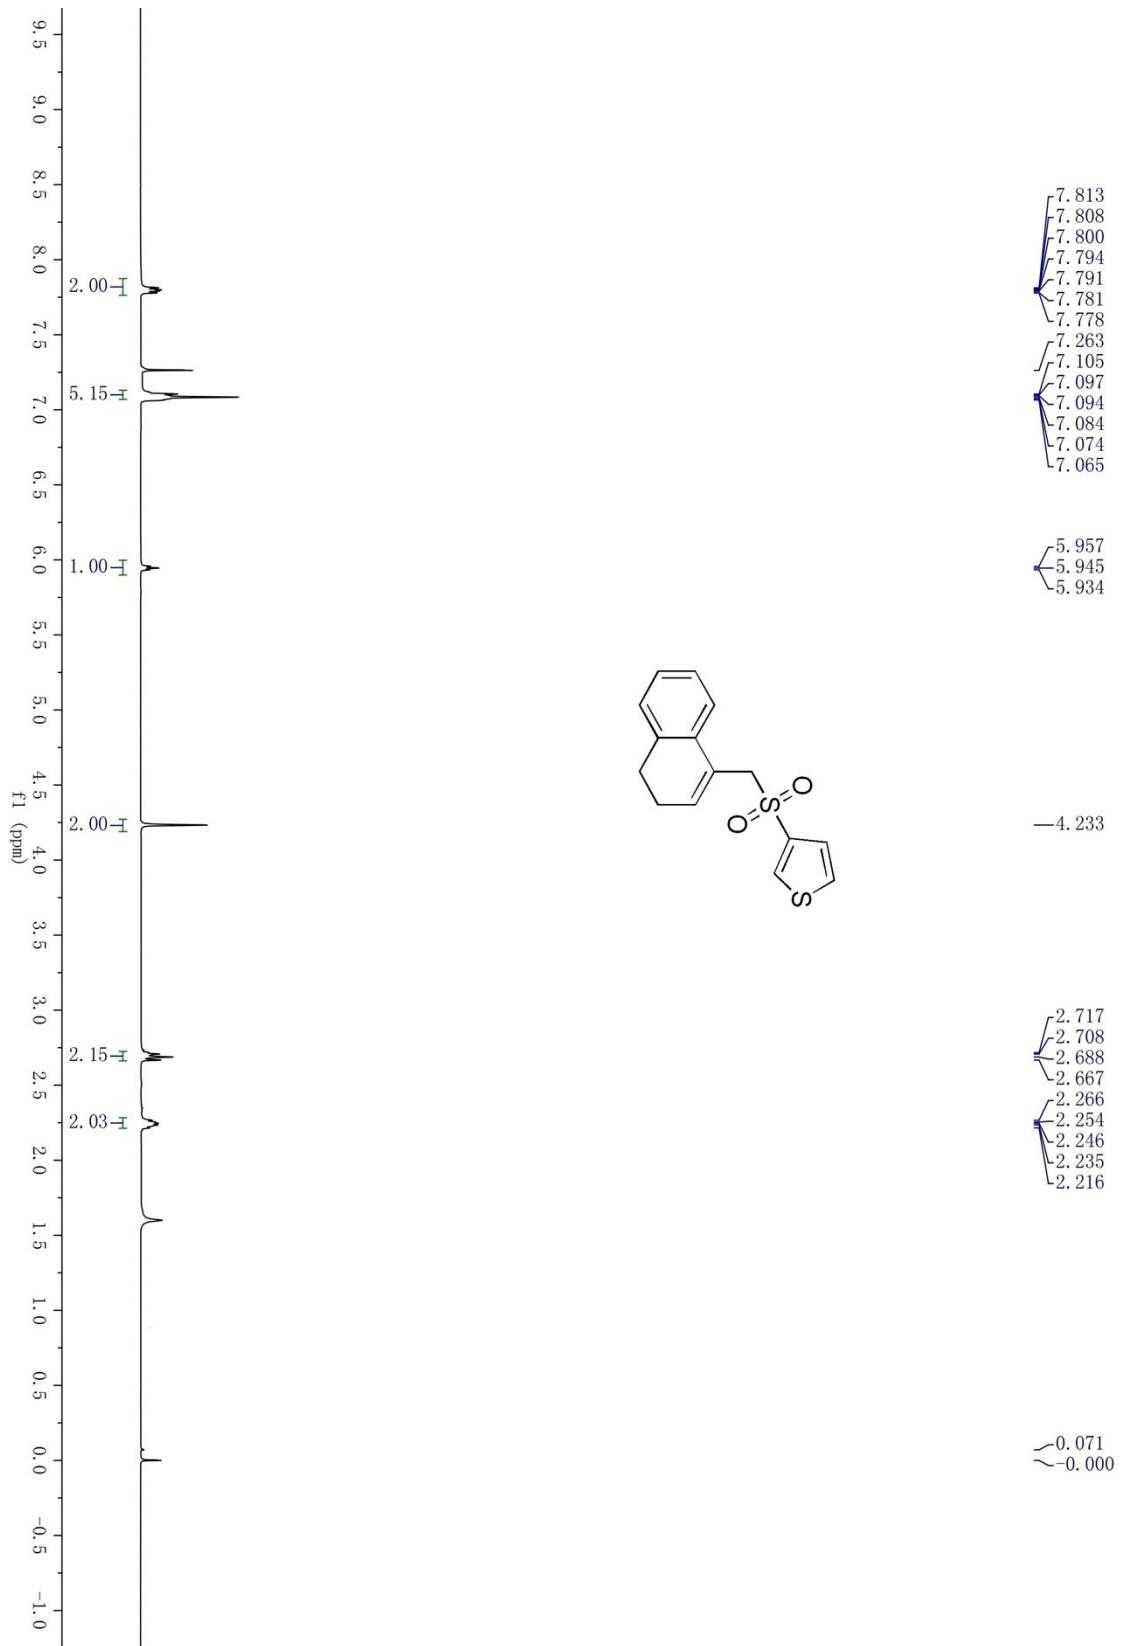

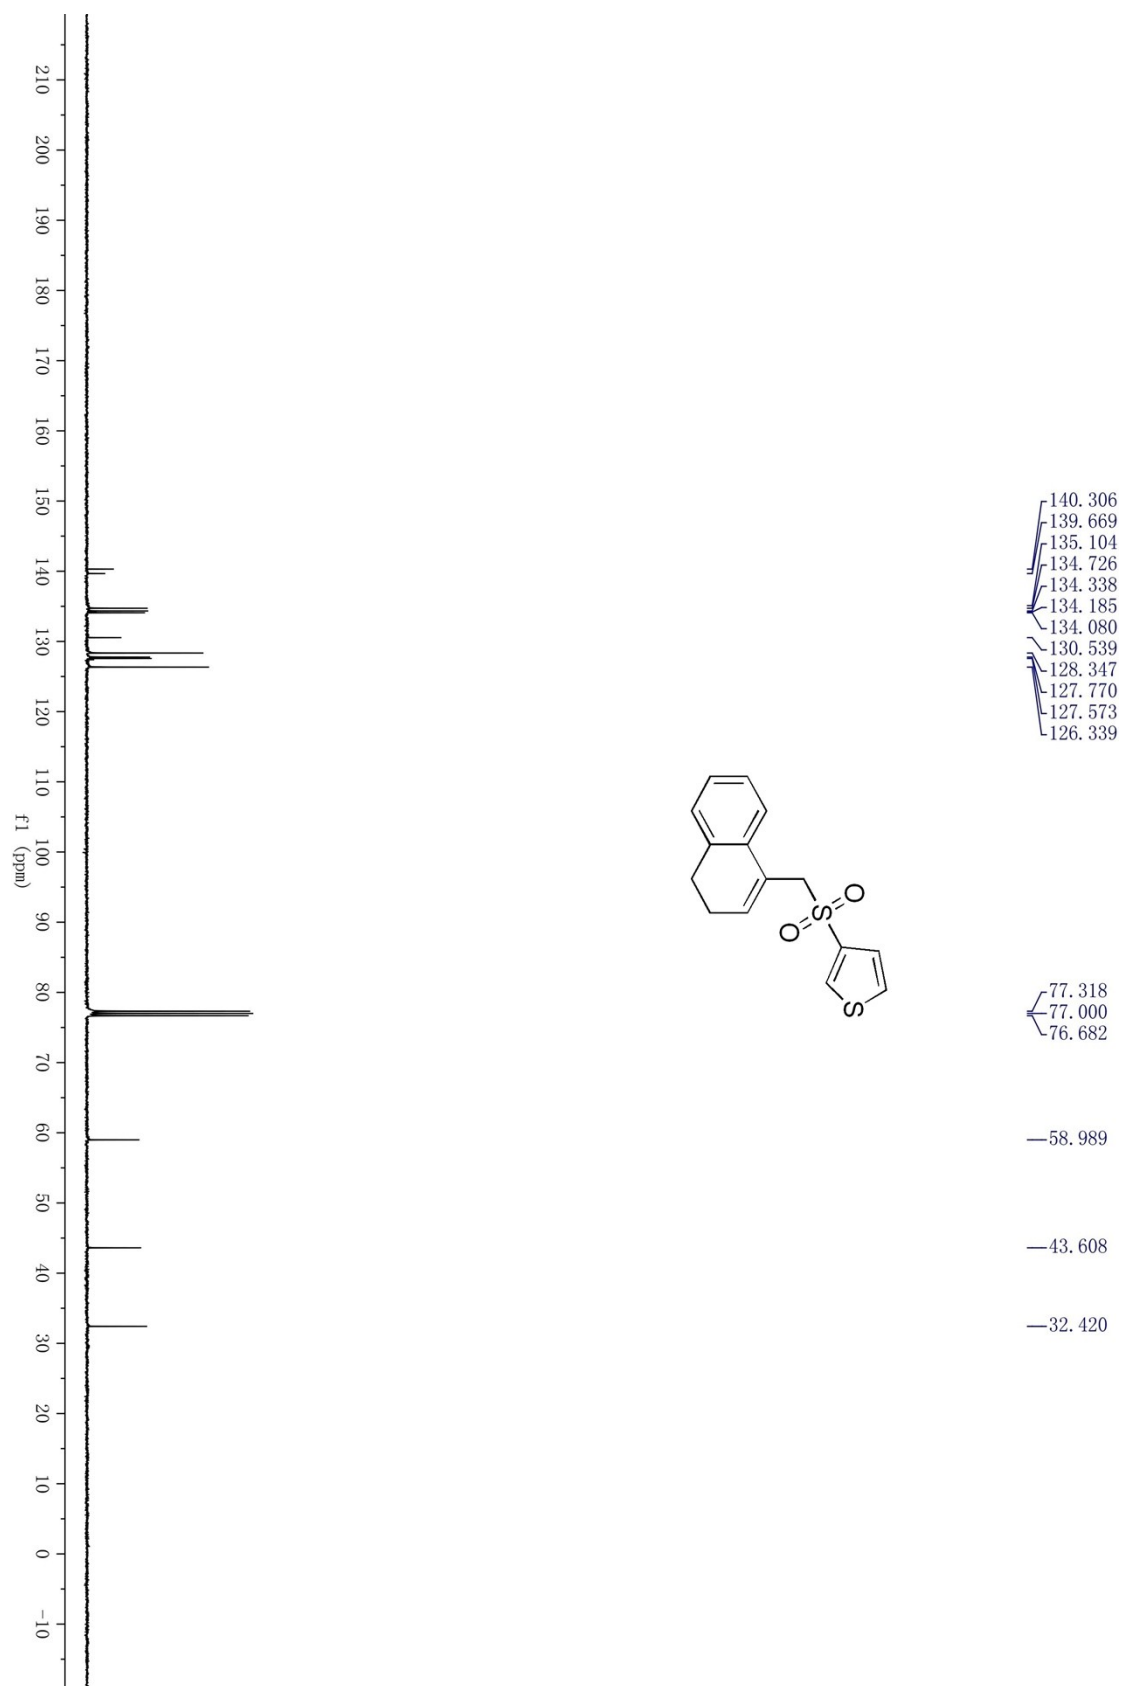



4-((Dodecylsulfonyl)methyl)-1,2-dihydronaphthalene (3at)

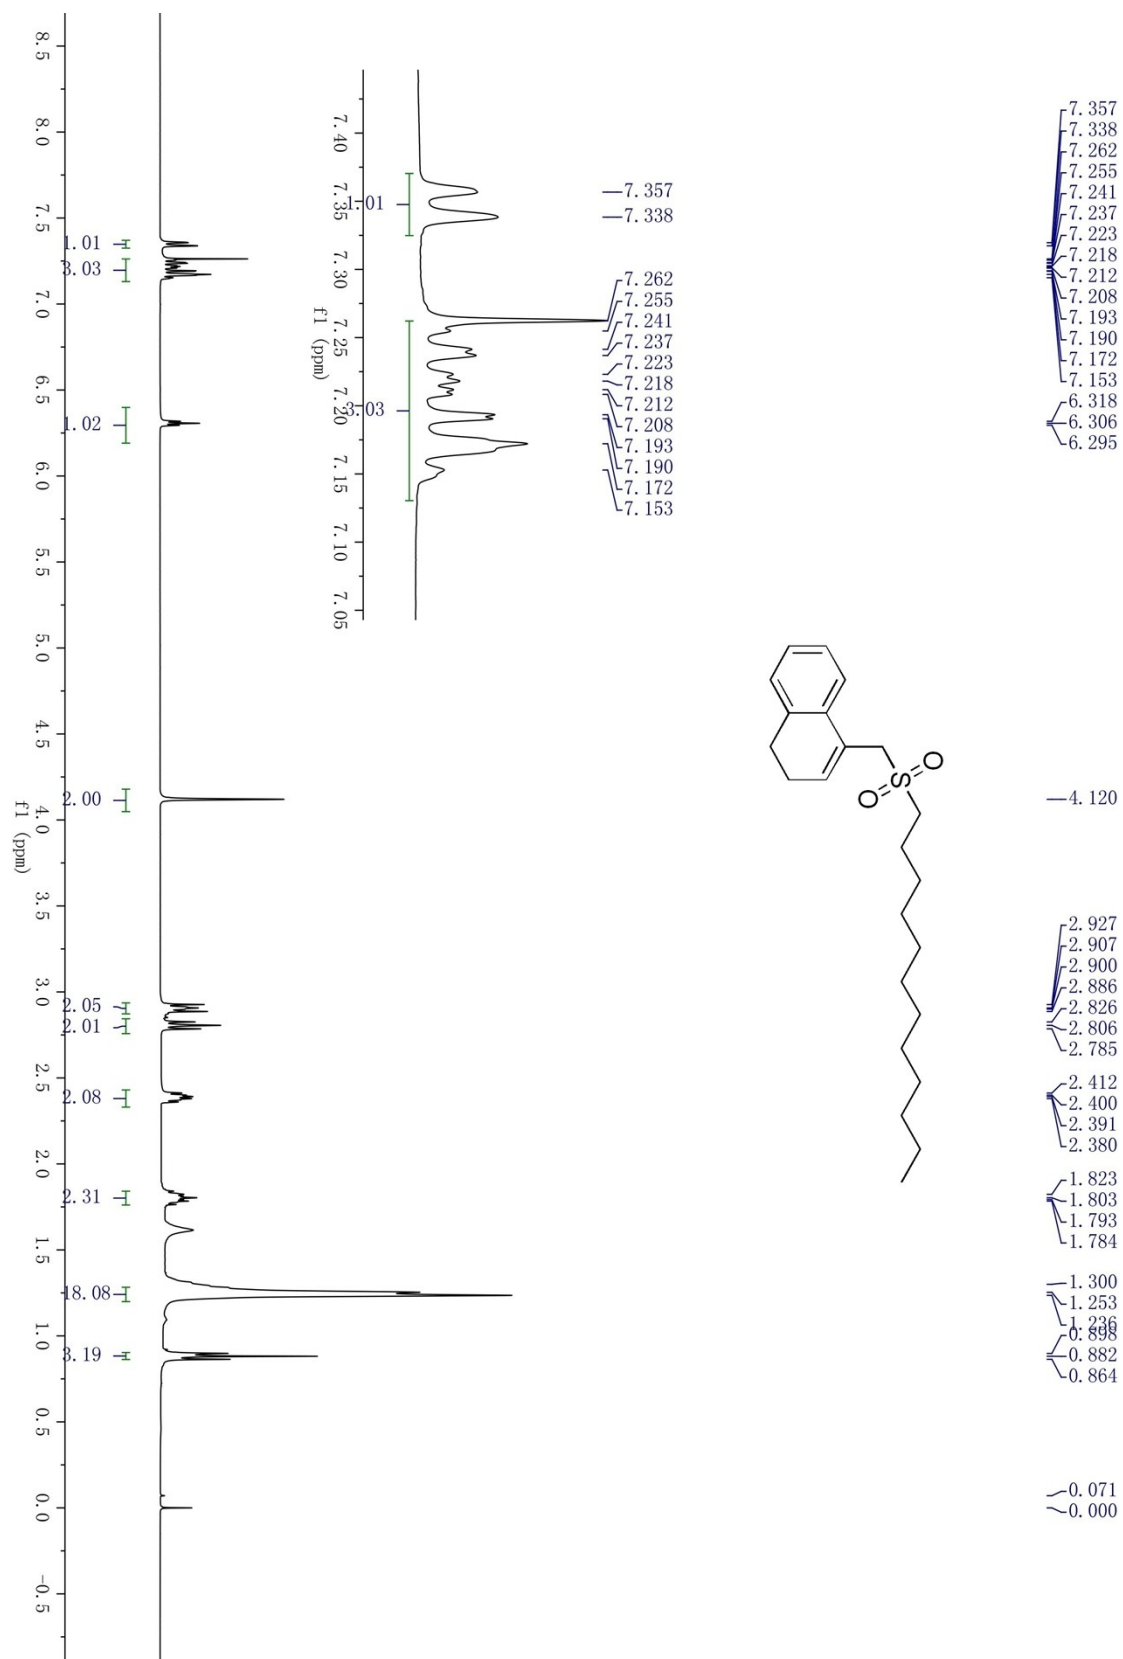

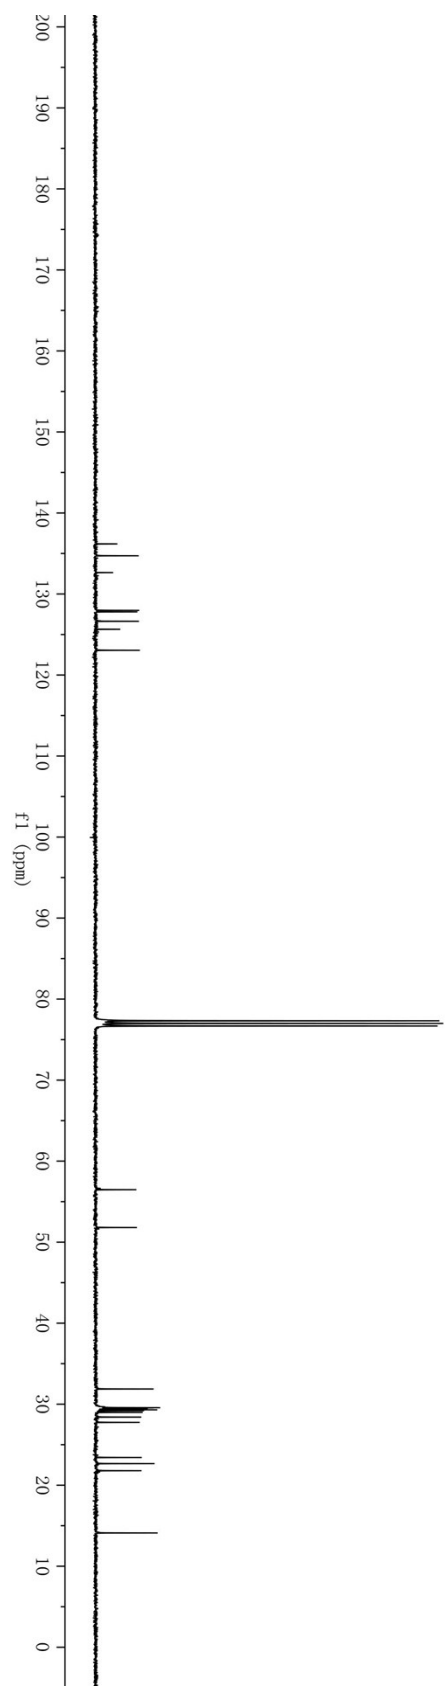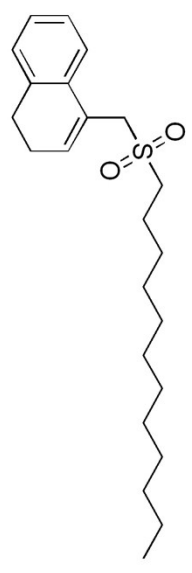

- 136.184
- 134.720
- 132.643
- 127.979
- 127.792
- 126.634
- 125.647
- 123.053
  
- 77.318
- 77.000
- 76.682
  
- 56.474
- 51.805
  
- 31.876
- 29.568
- 29.543
- 29.451
- 29.305
- 29.189
- 28.988
- 28.406
- 27.753
- 23.422
- 22.663
- 21.788
- 14.107

4-((Ethylsulfonyl)methyl)-1,2-dihydronaphthalene (3au)

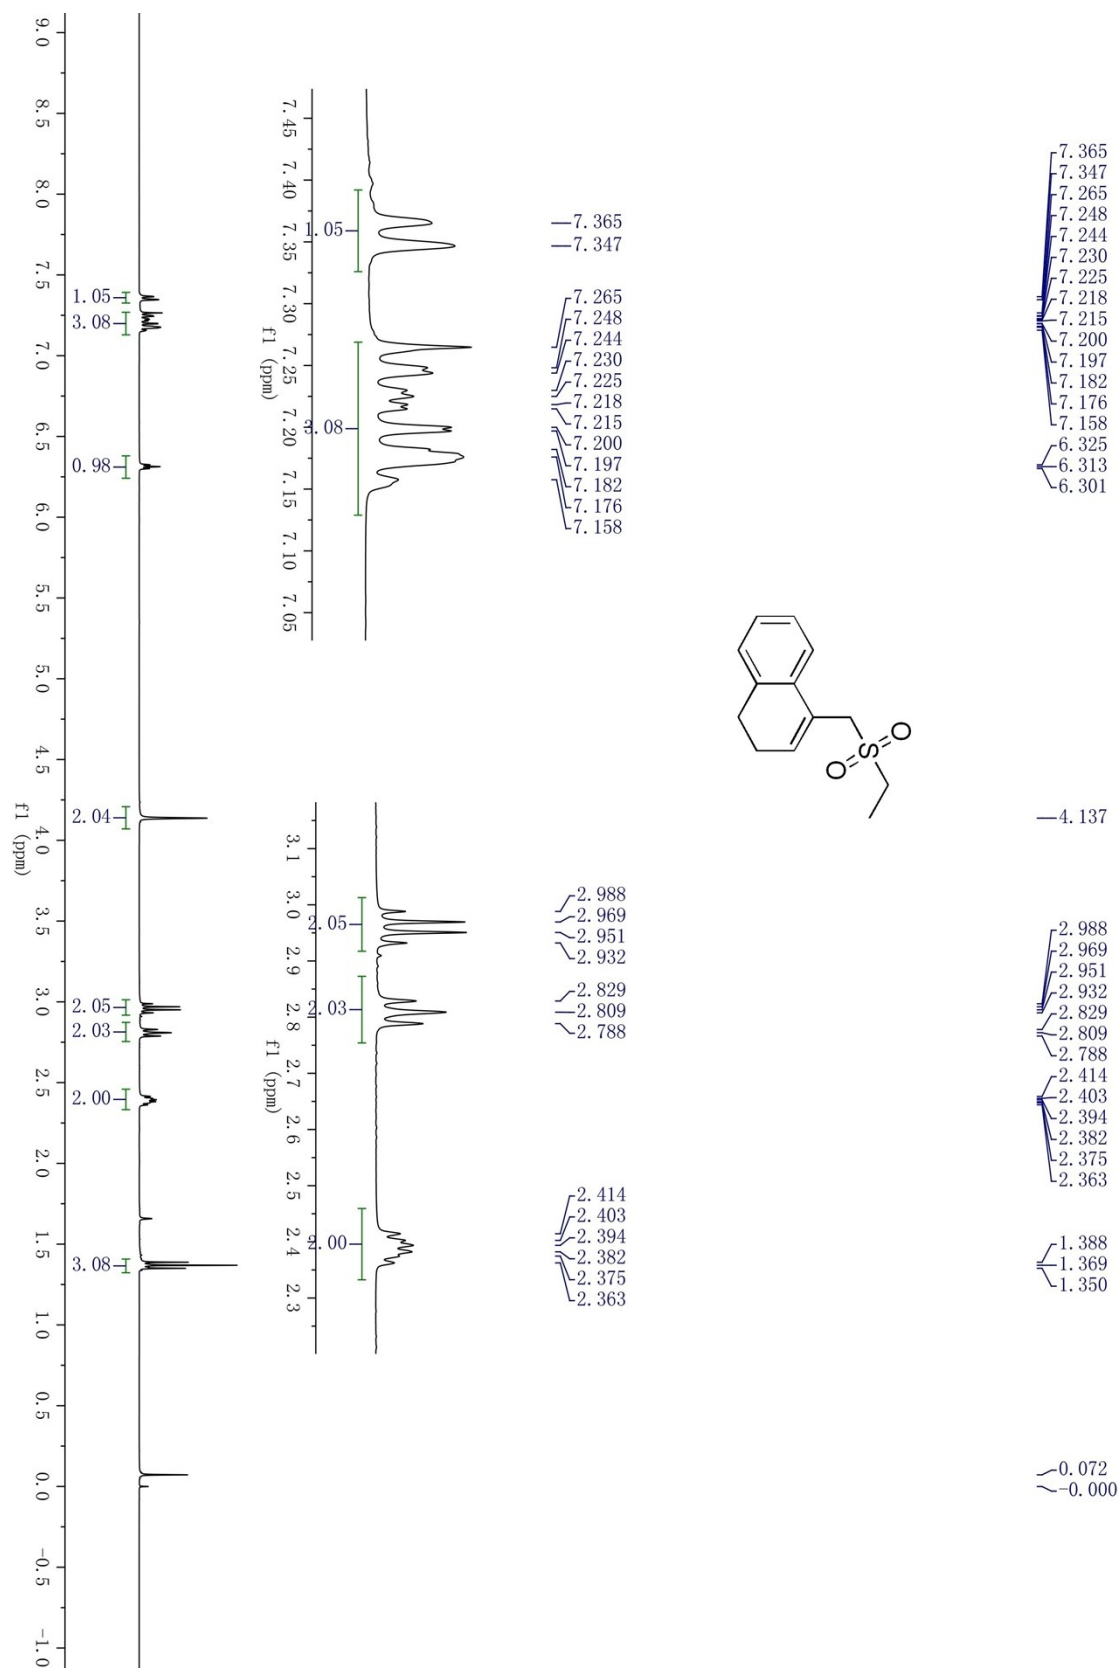

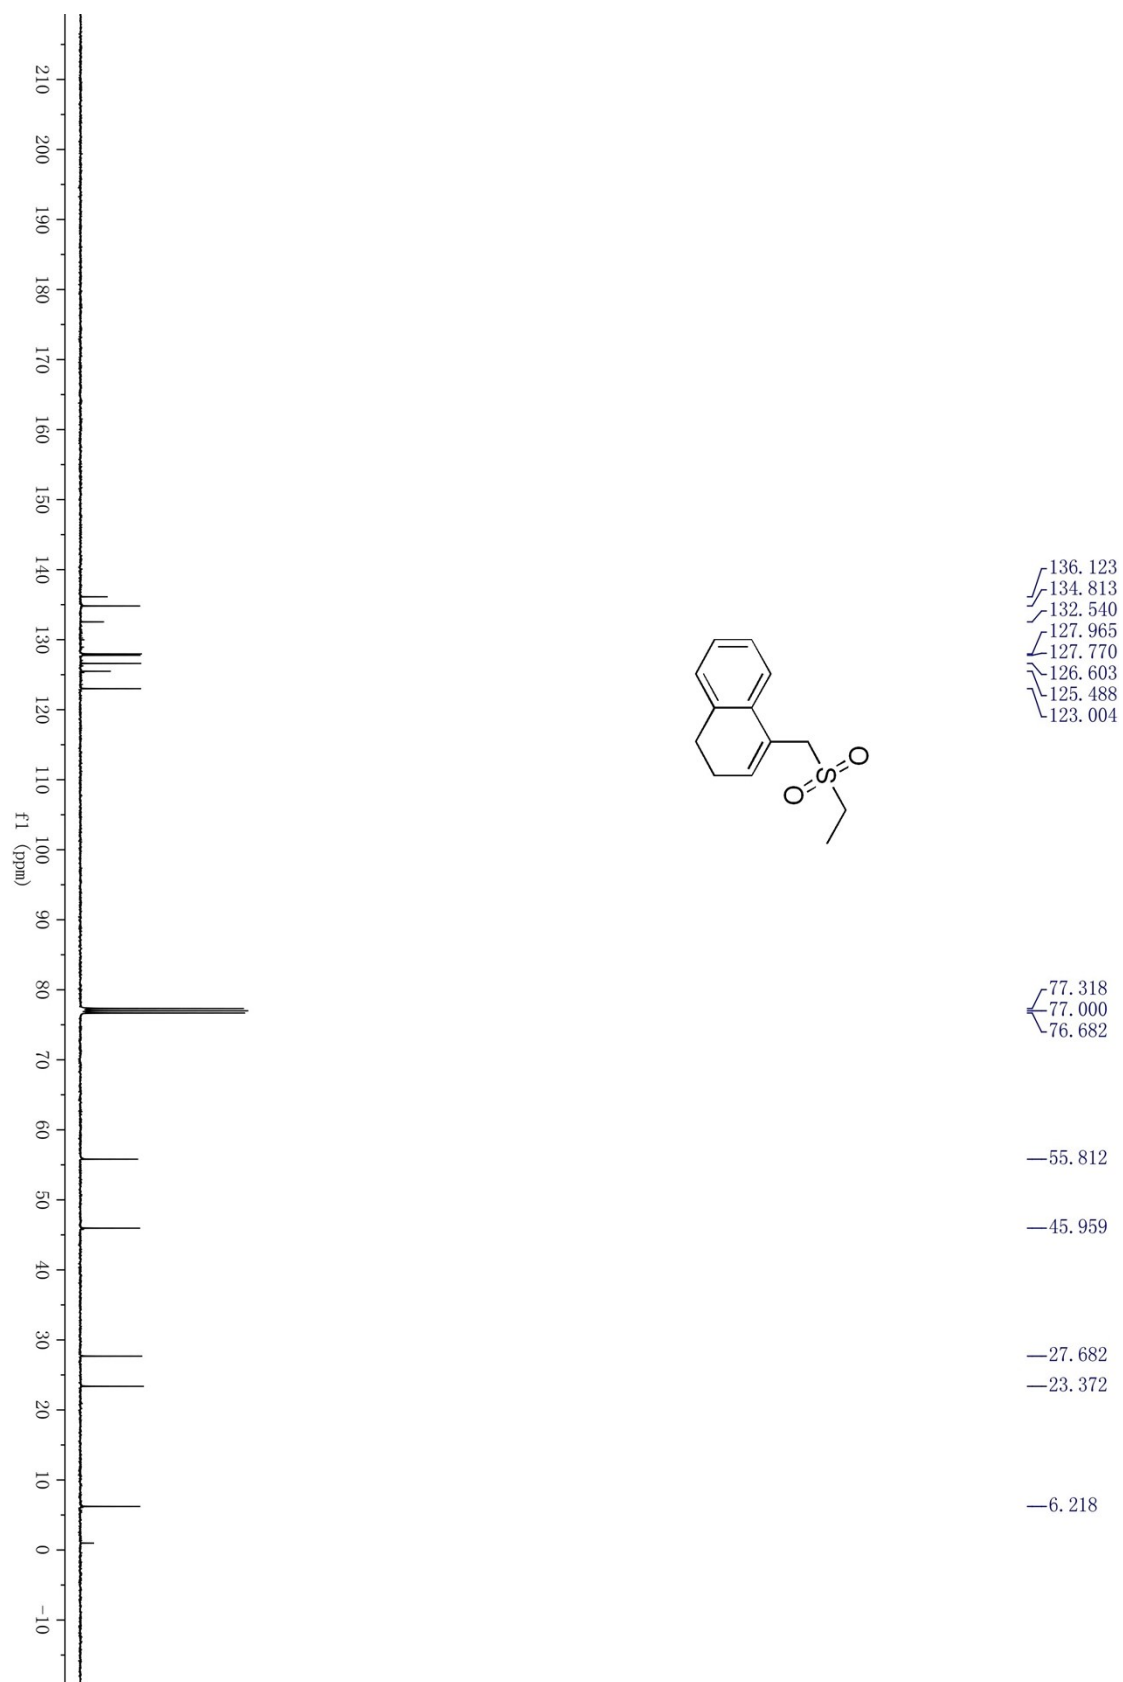

4-(((4-chlorophenyl)sulfonyl)methyl)-5-methoxy-1,2-dihydronaphthalene (3bf)

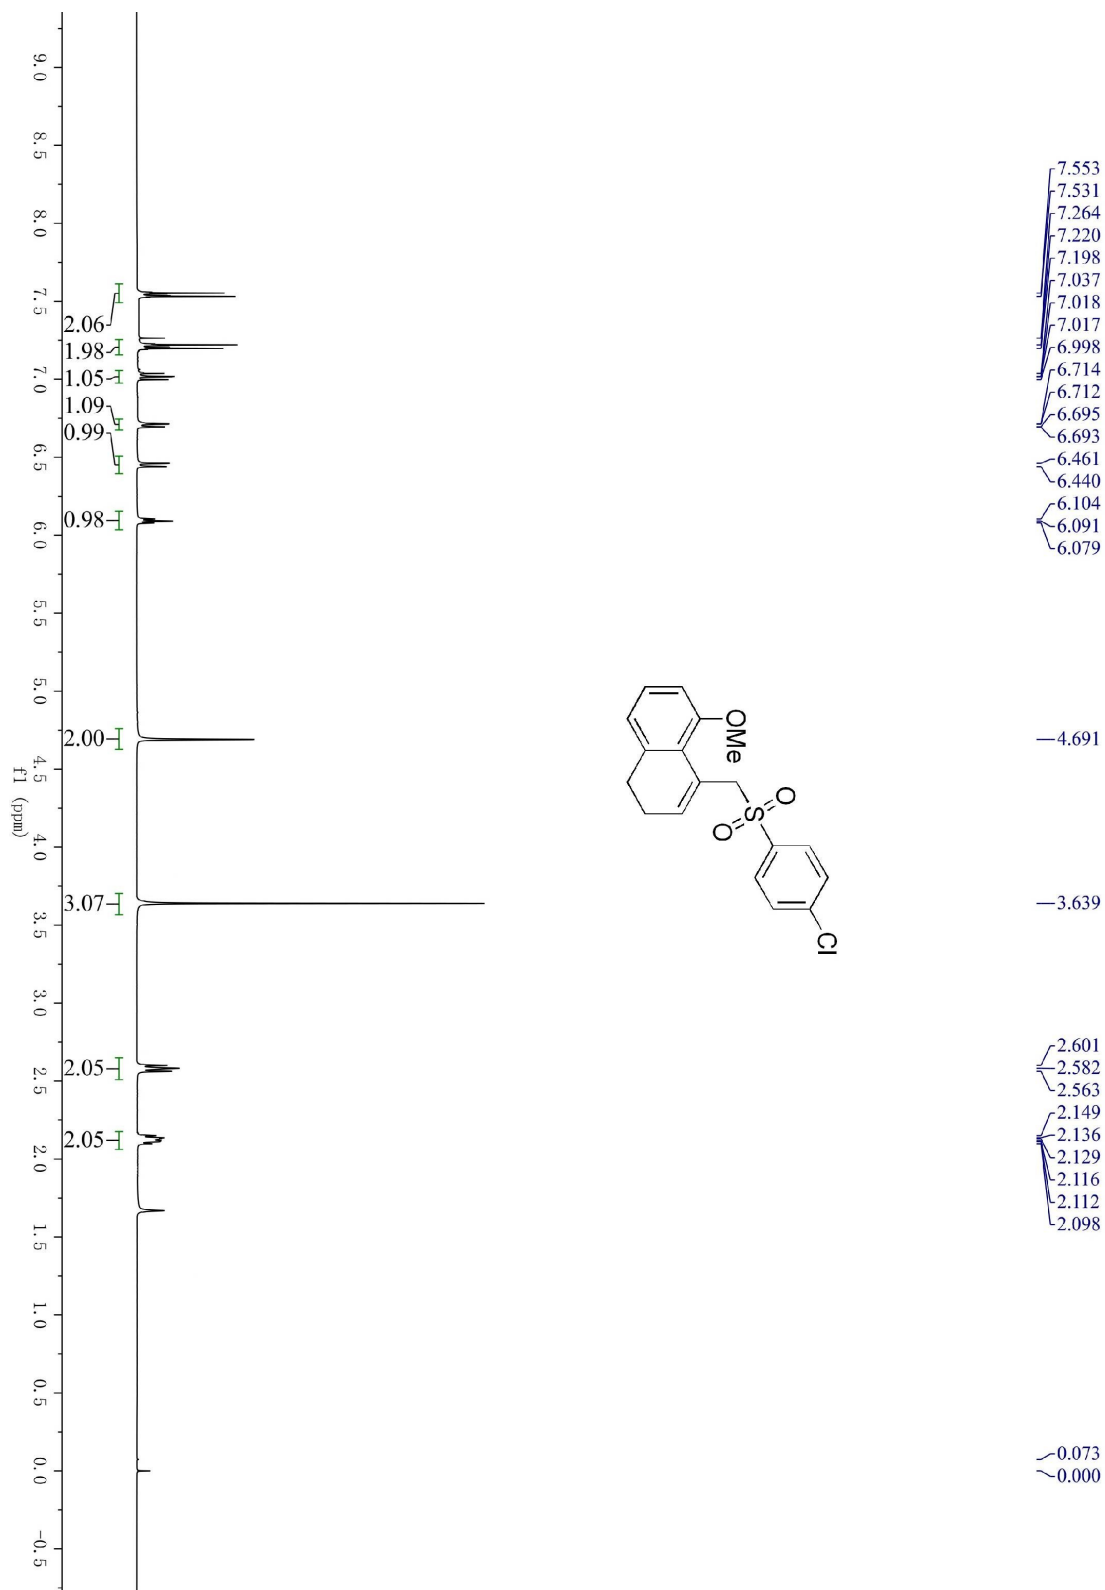

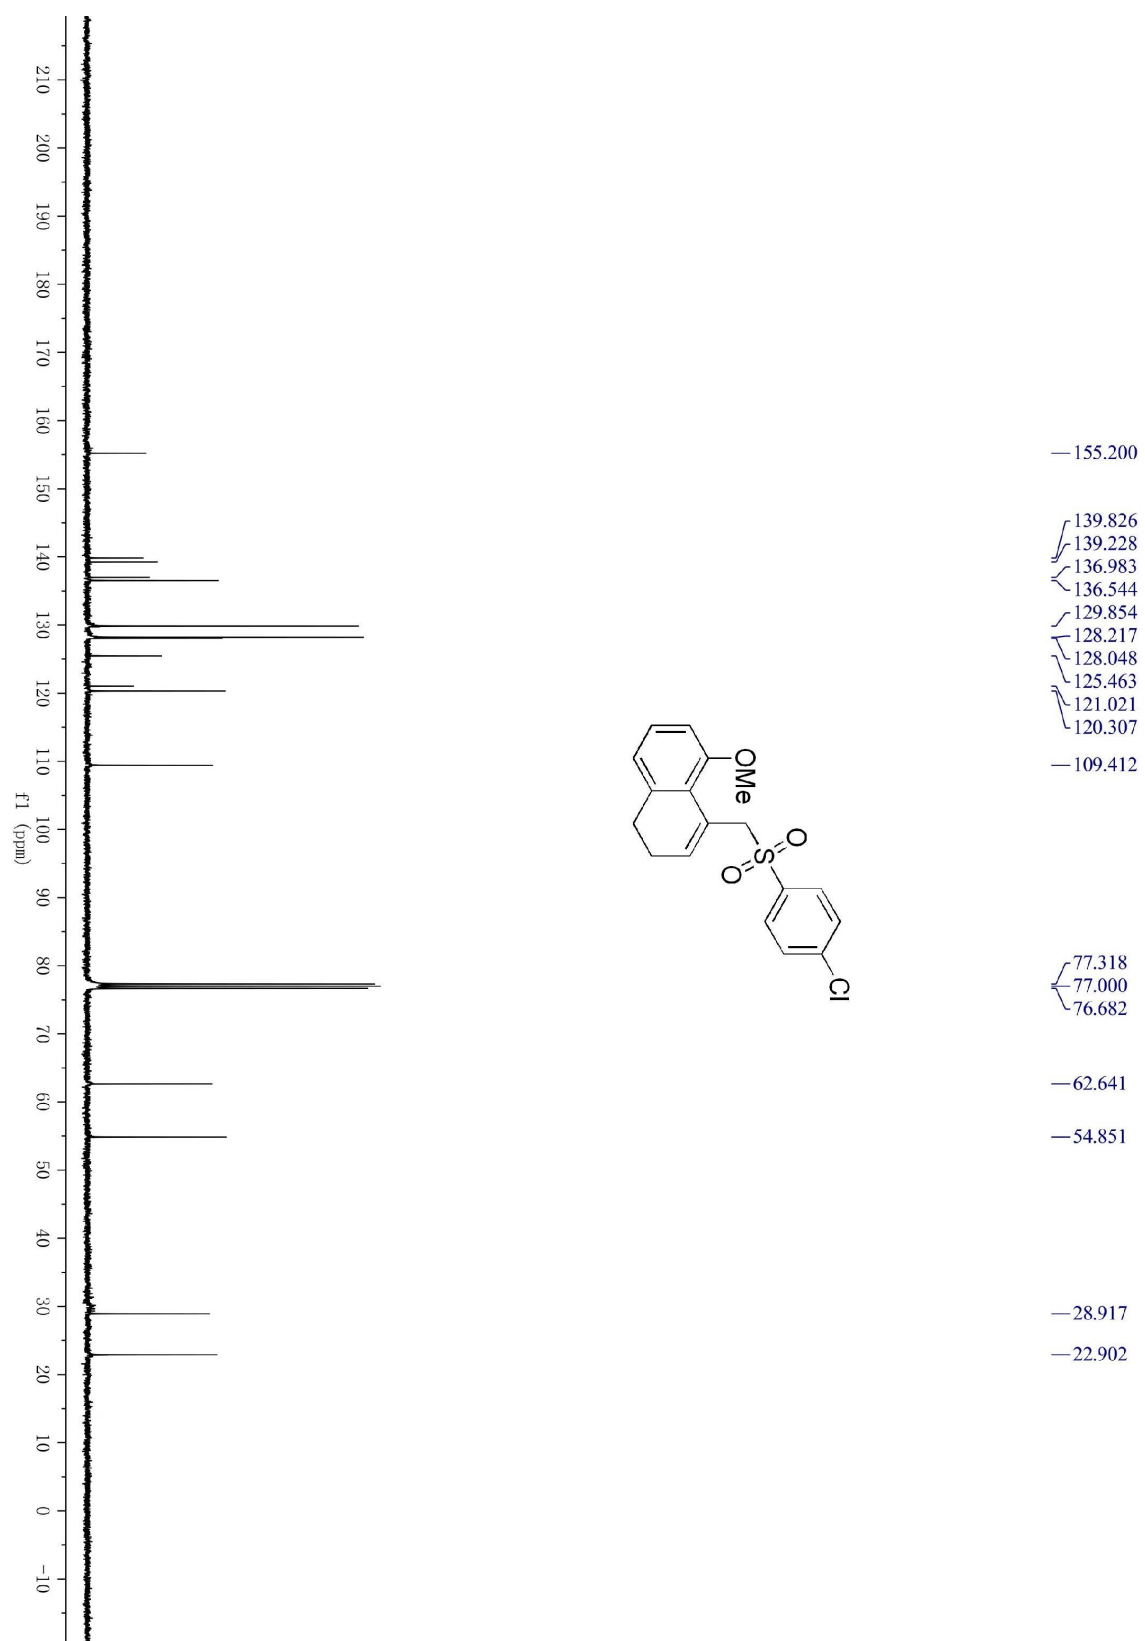

4-(((4-chlorophenyl)sulfonyl)methyl)-6-methyl-1,2-dihydronaphthalene (3cf) and 4-(((4-chlorophenyl)sulfonyl)methyl)-8-methyl-1,2-dihydronaphthalene (3cf')

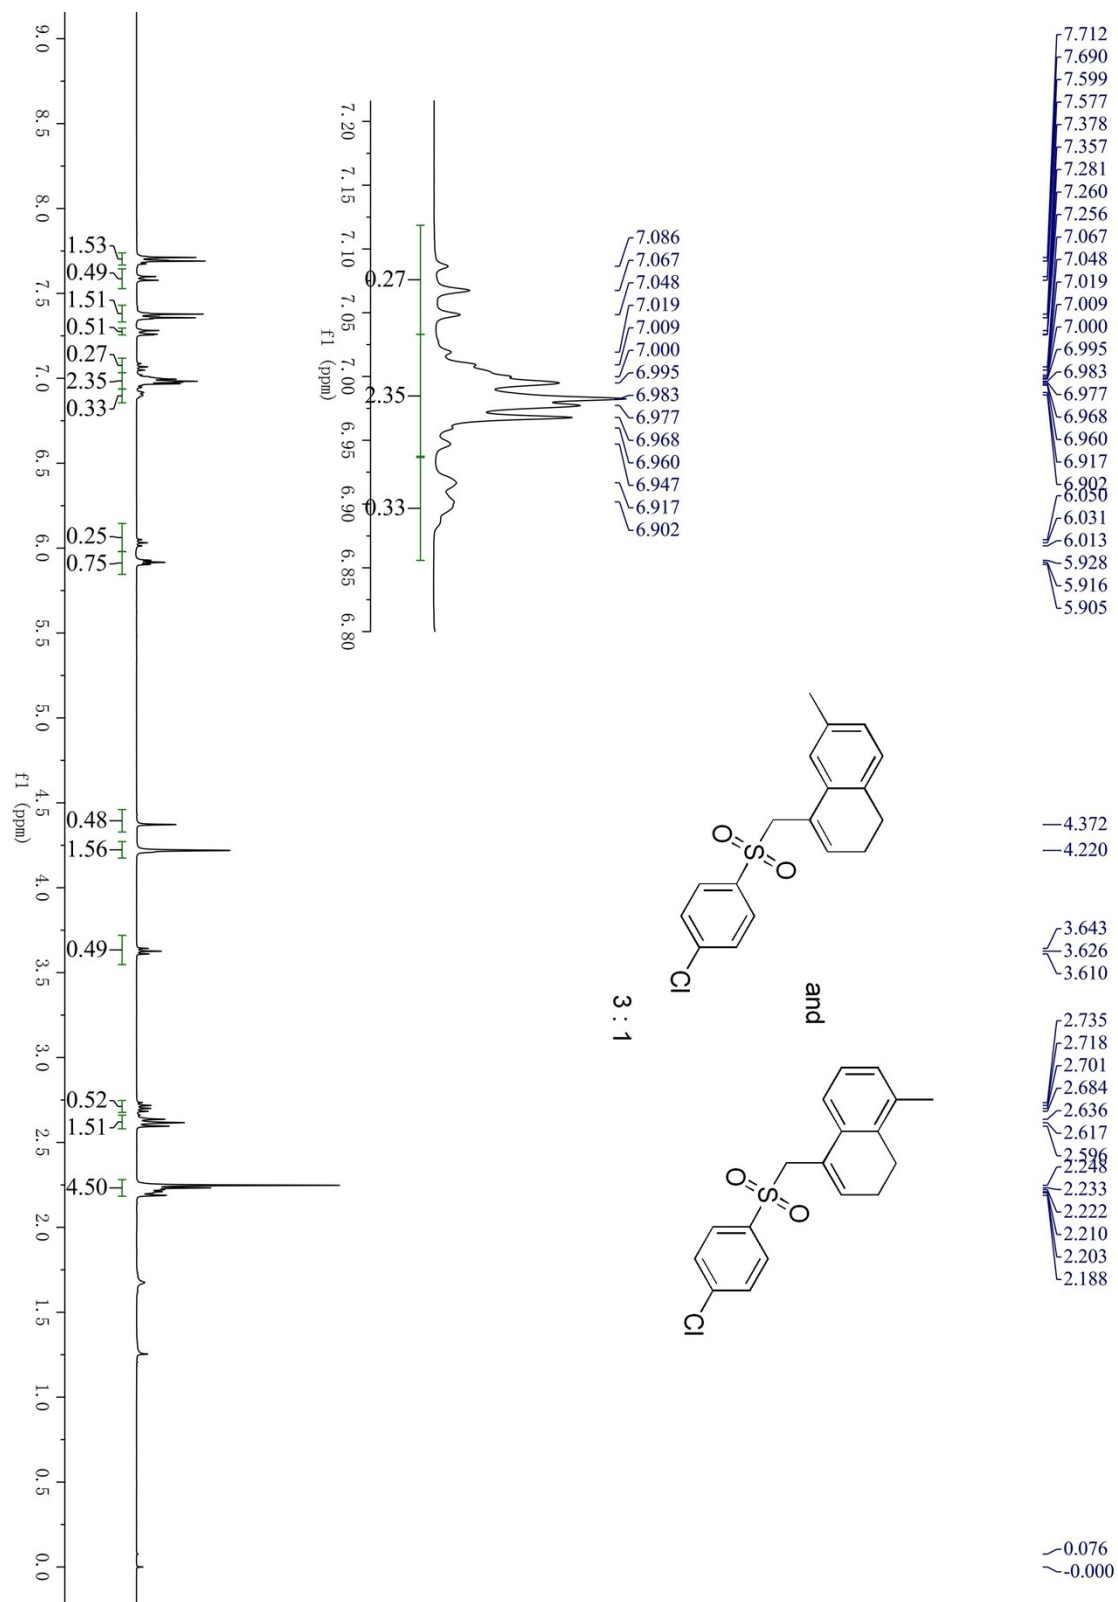

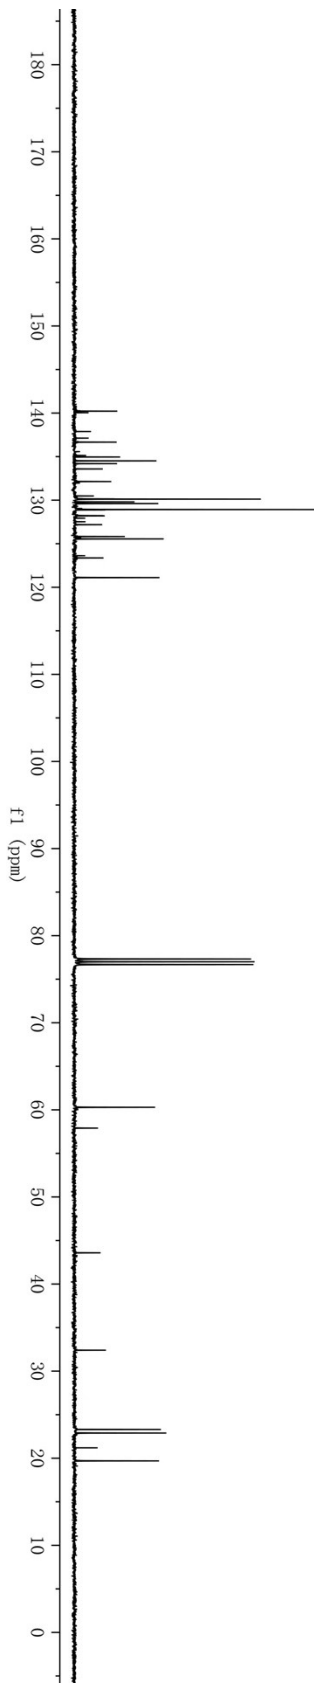

3 : 1

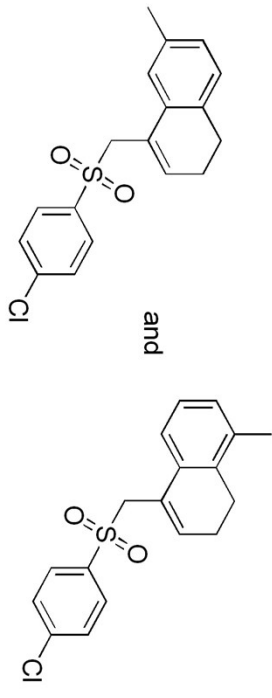

- 140.219
- 140.038
- 137.886
- 137.124
- 136.665
- 134.958
- 134.512
- 134.197
- 133.583
- 132.138
- 130.482
- 130.121
- 129.803
- 129.608
- 128.922
- 128.881
- 128.224
- 128.196
- 127.188
- 125.823
- 125.553
- 123.366
- 121.110
  
- 77.318
- 77.000
- 76.683
  
- 60.296
- 57.903
  
- 43.585
  
- 32.403
  
- 23.304
- 22.892
- 21.194
- 19.696



4-(((4-Chlorophenyl)sulfonyl)methyl)-7-methoxy-1,2-dihydronaphthalene (3df)

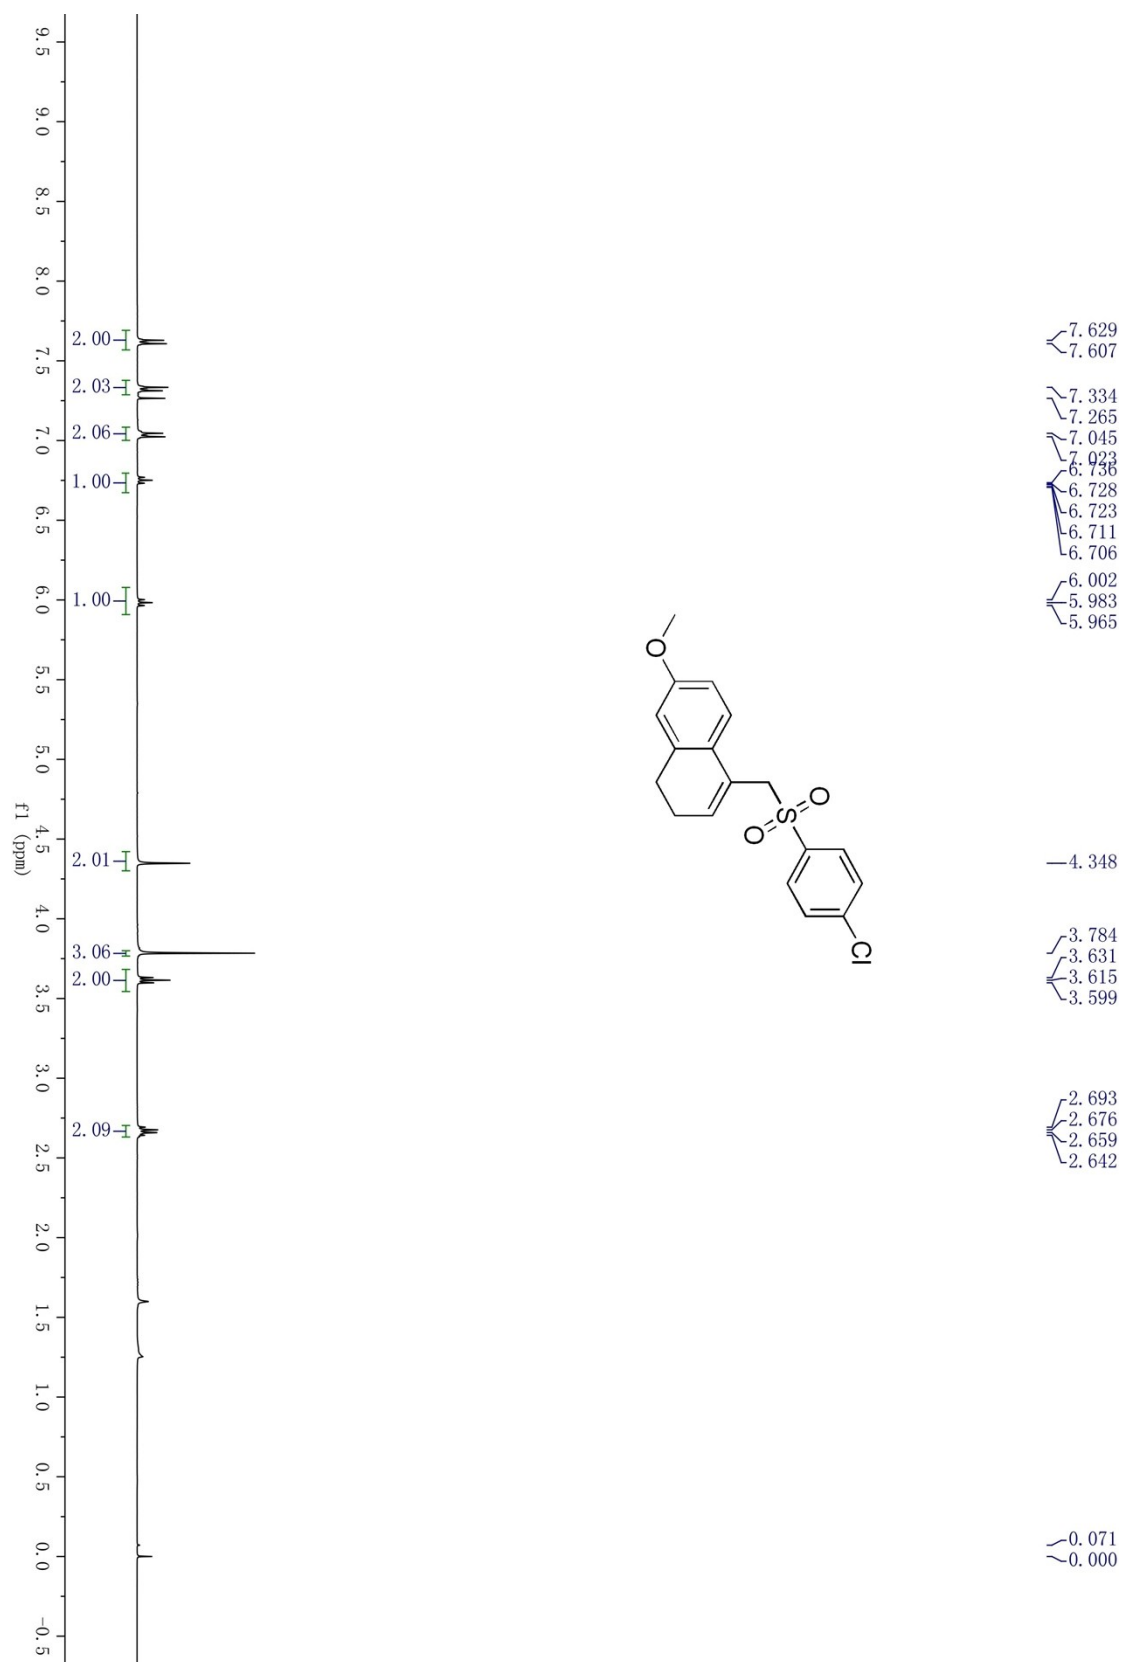

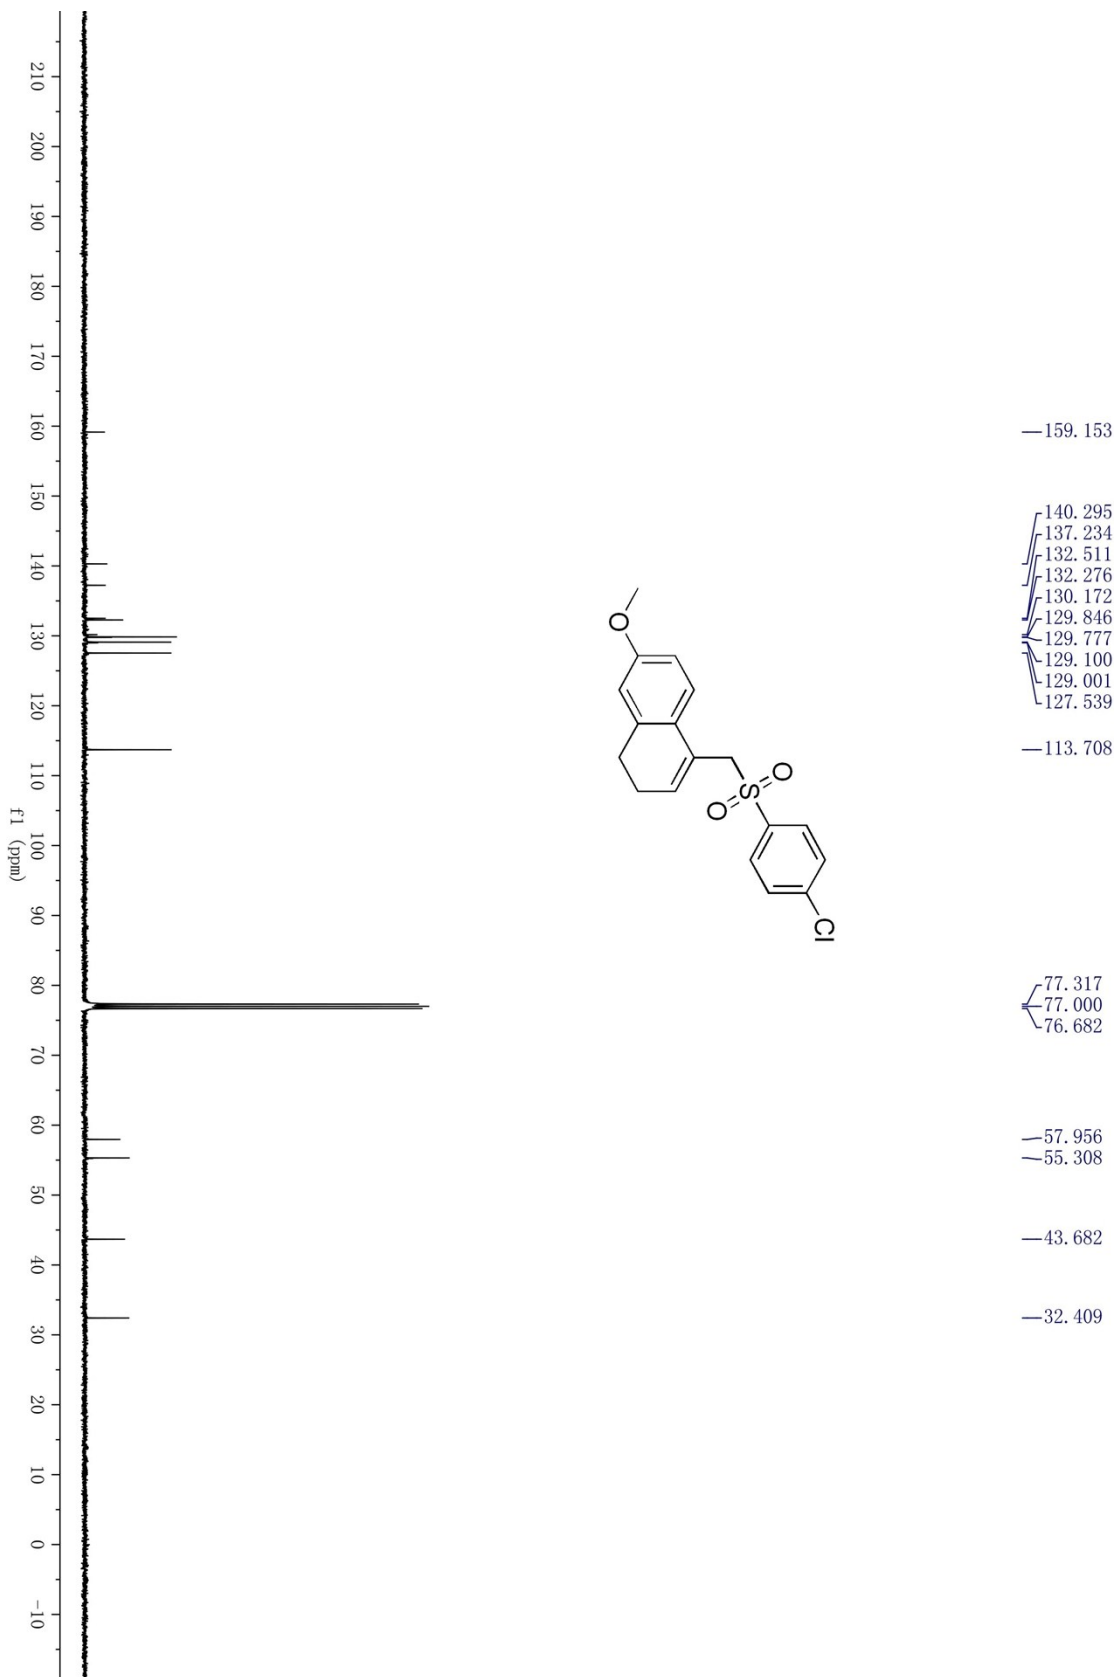

7-(benzyloxy)-4-(((4-chlorophenyl)sulfonyl)methyl)-1,2-dihydronaphthalene (3ef)

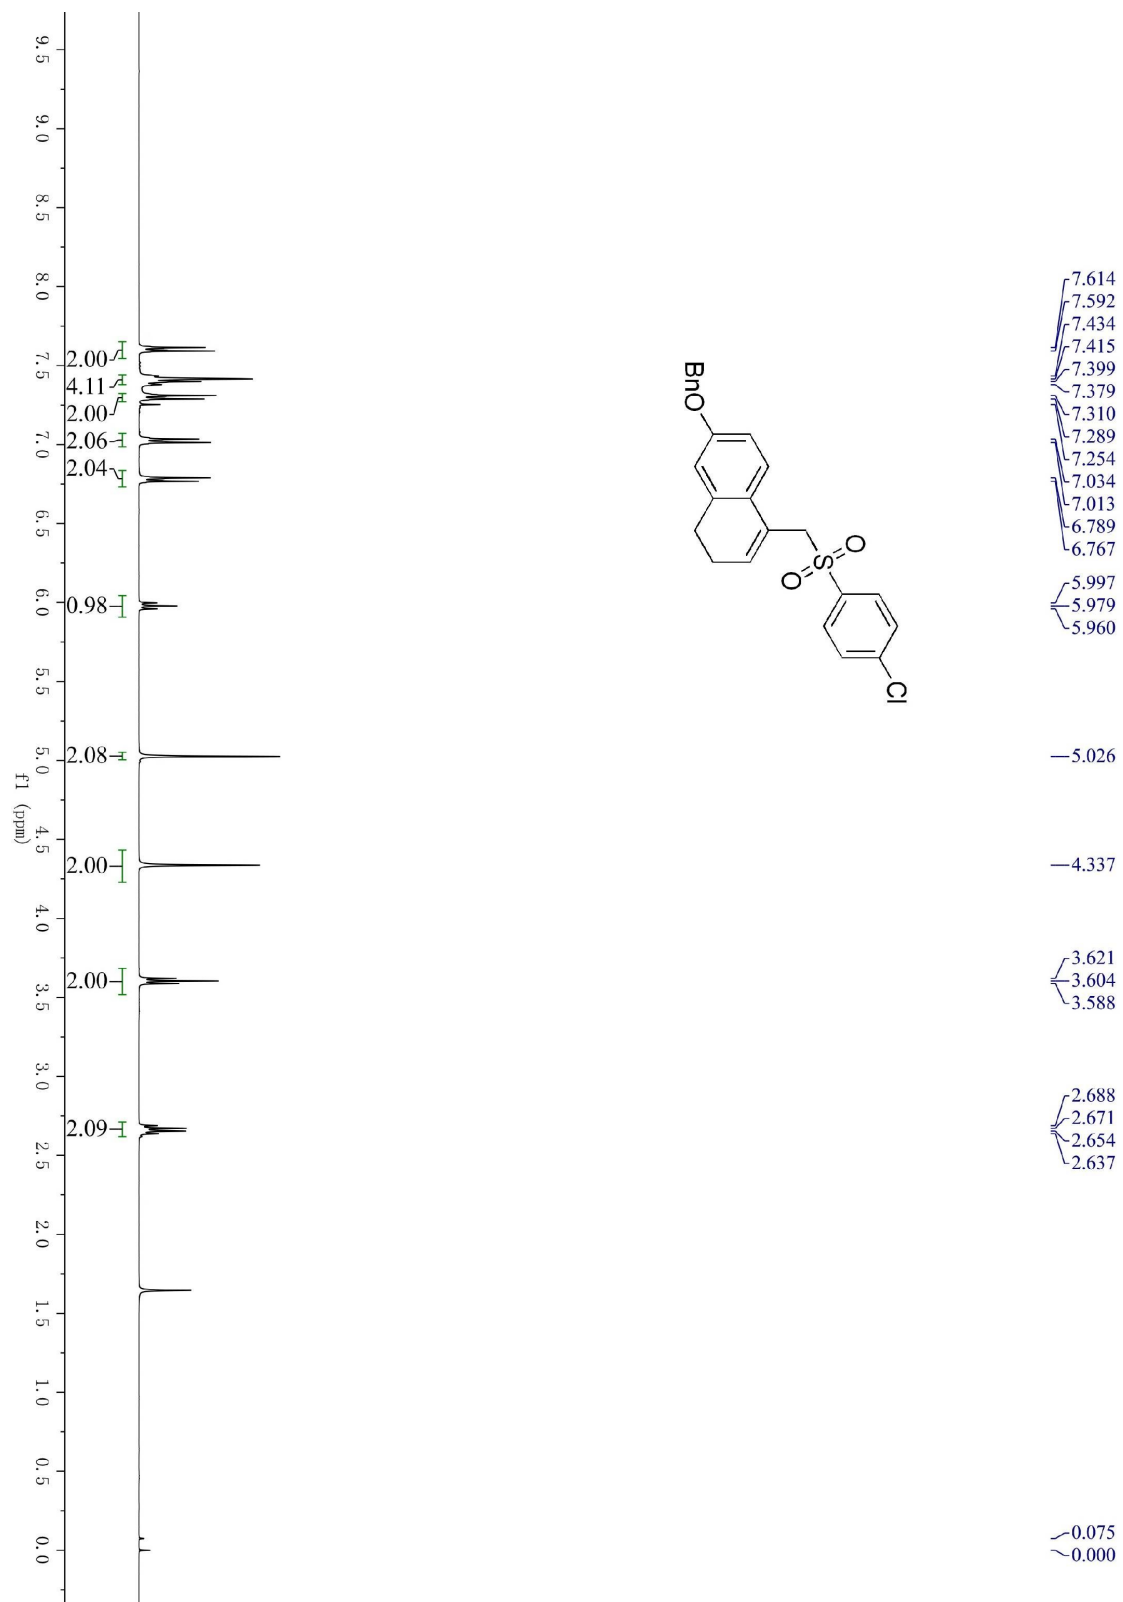

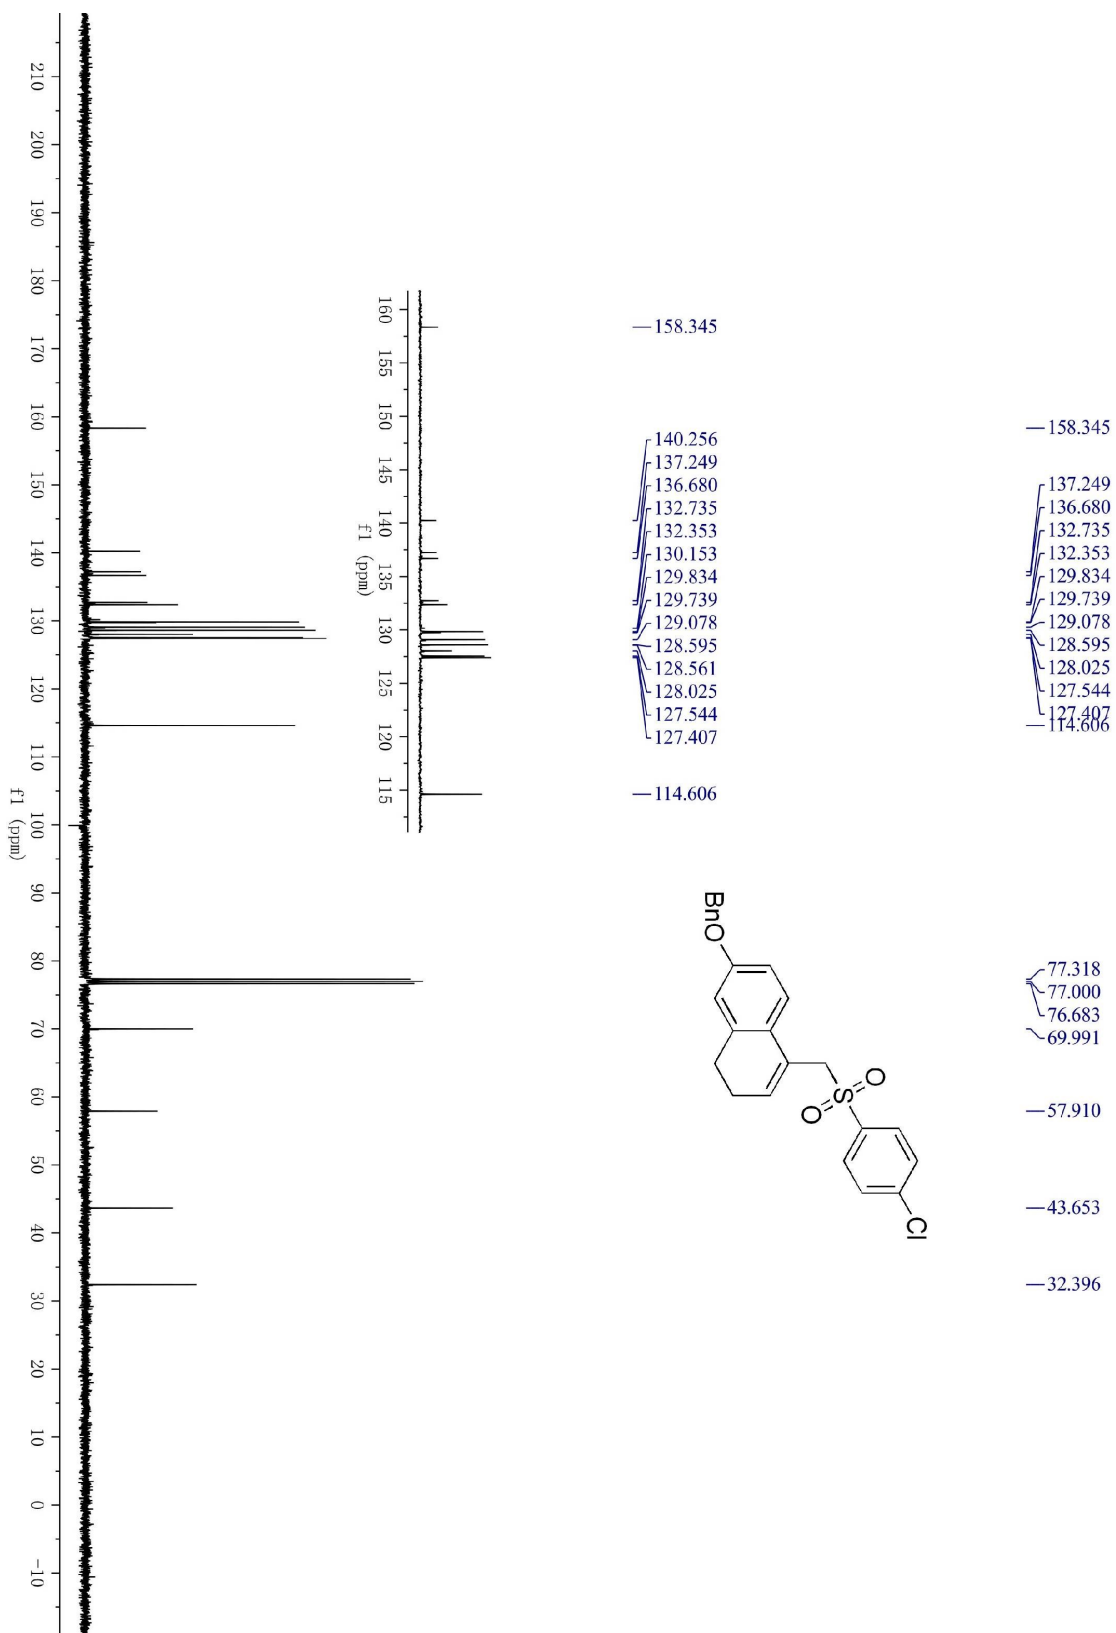

4-(((4-chlorophenyl)sulfonyl)methyl)-7-methyl-1,2-dihydronaphthalene (3ff)

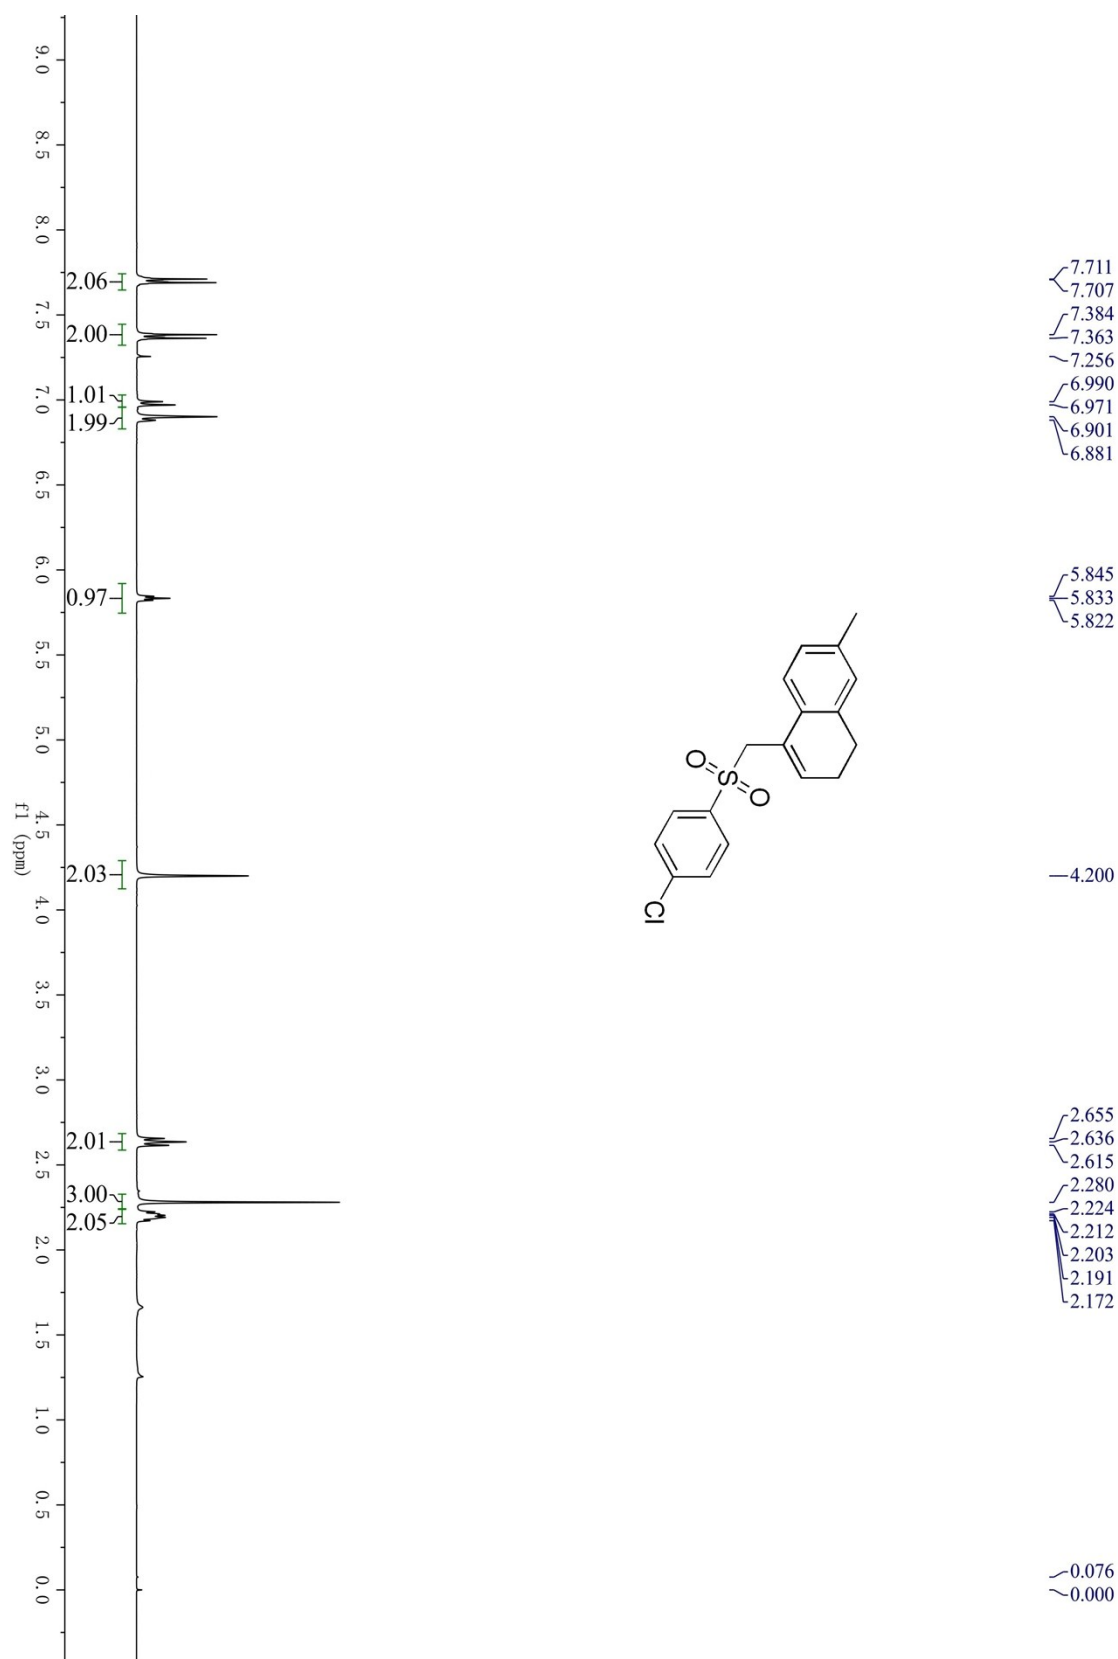

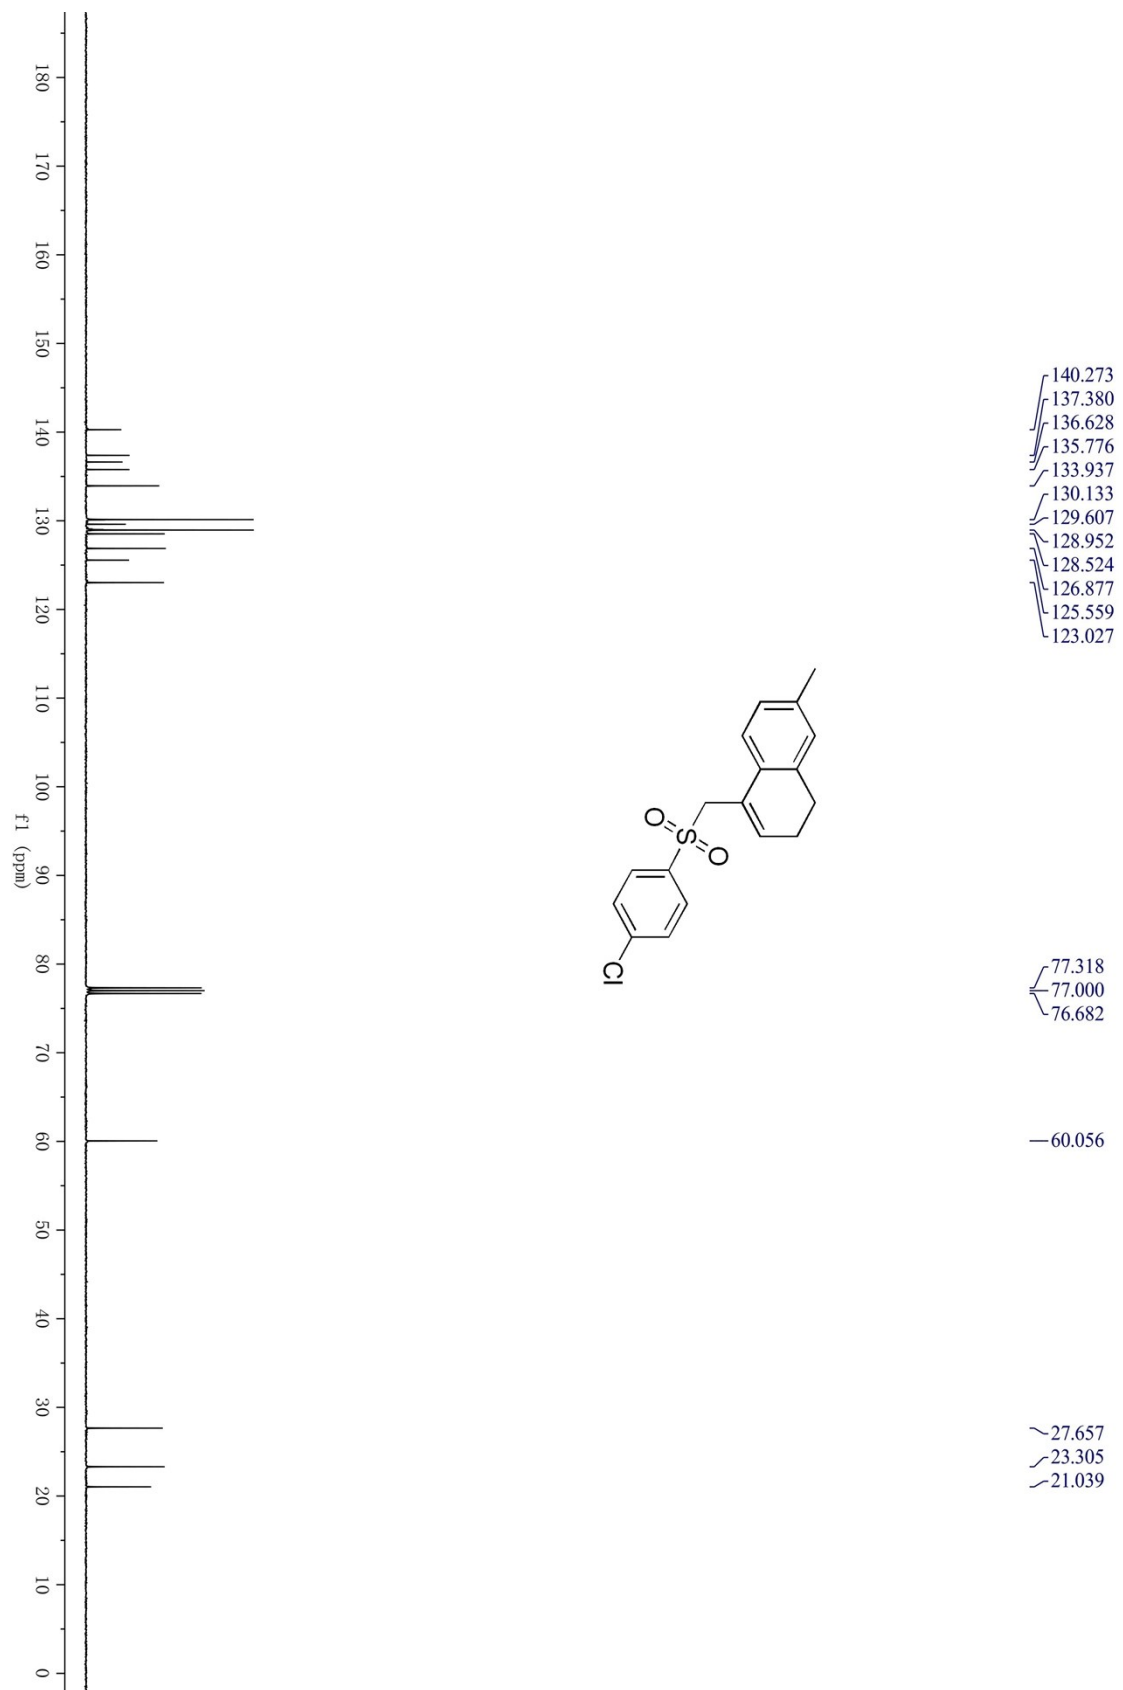

7-(*tert*-butyl)-4-(((4-chlorophenyl)sulfonyl)methyl)-1,2-dihydronaphthalene (3gf)

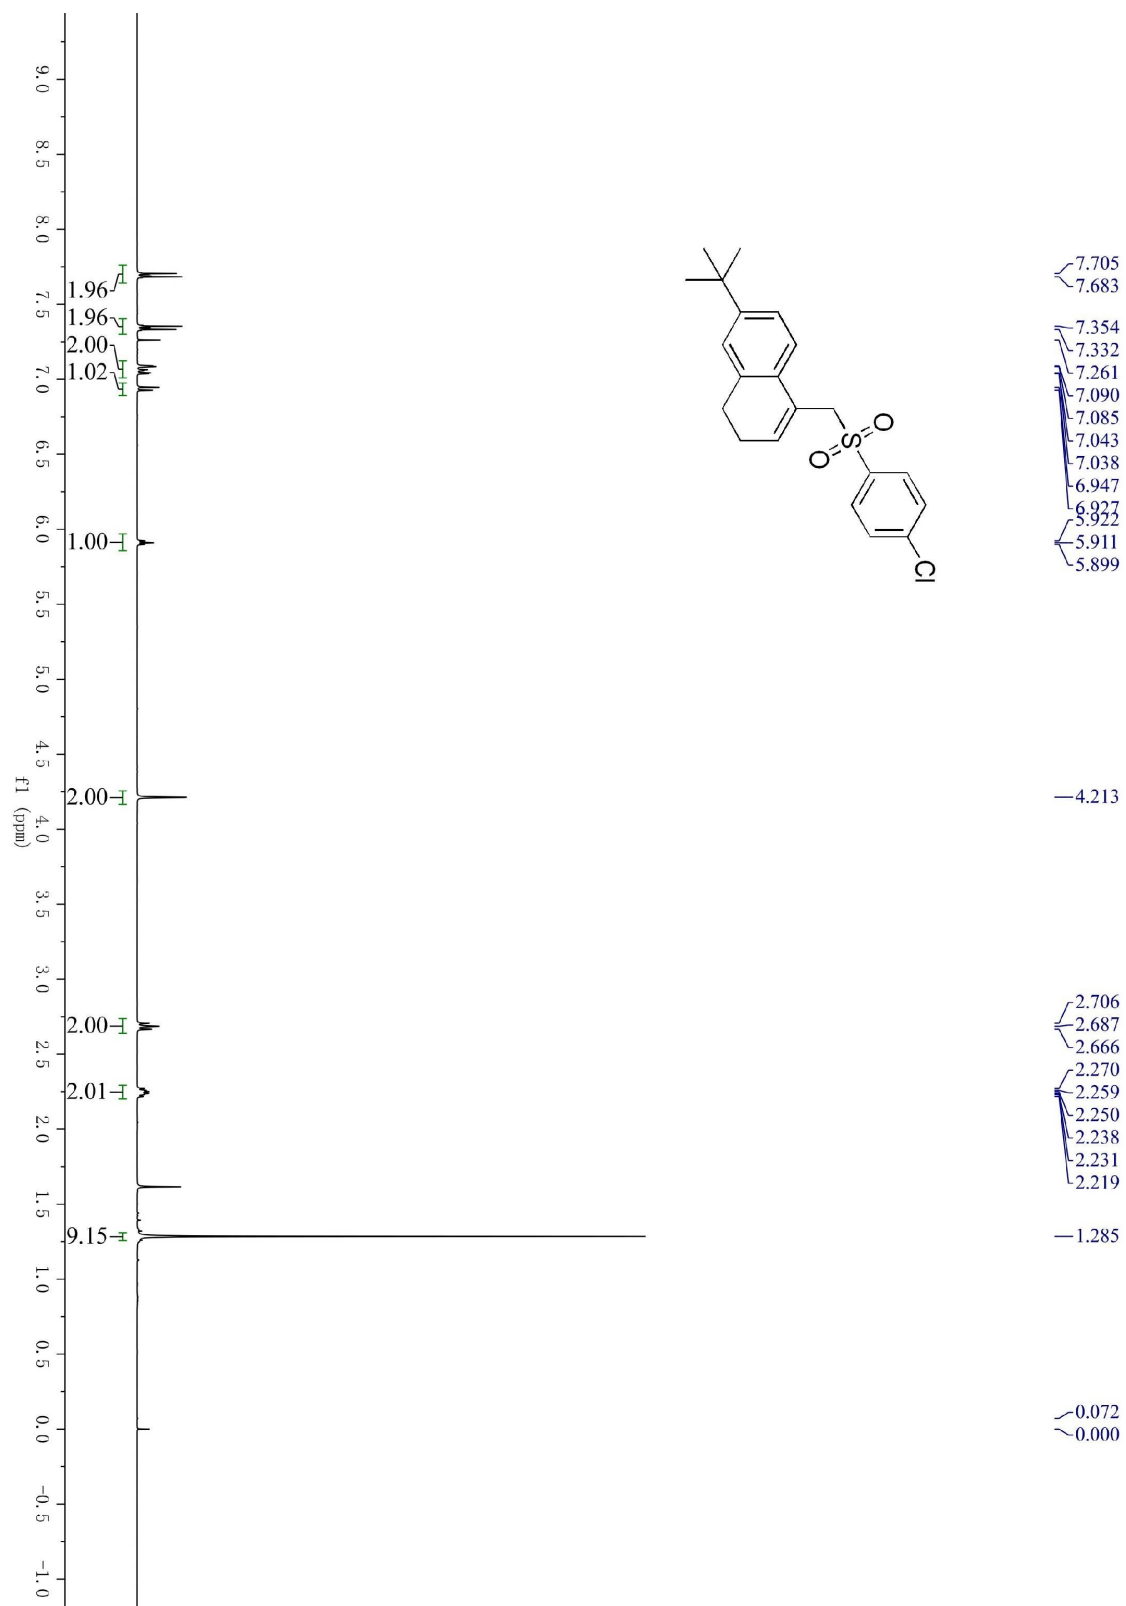

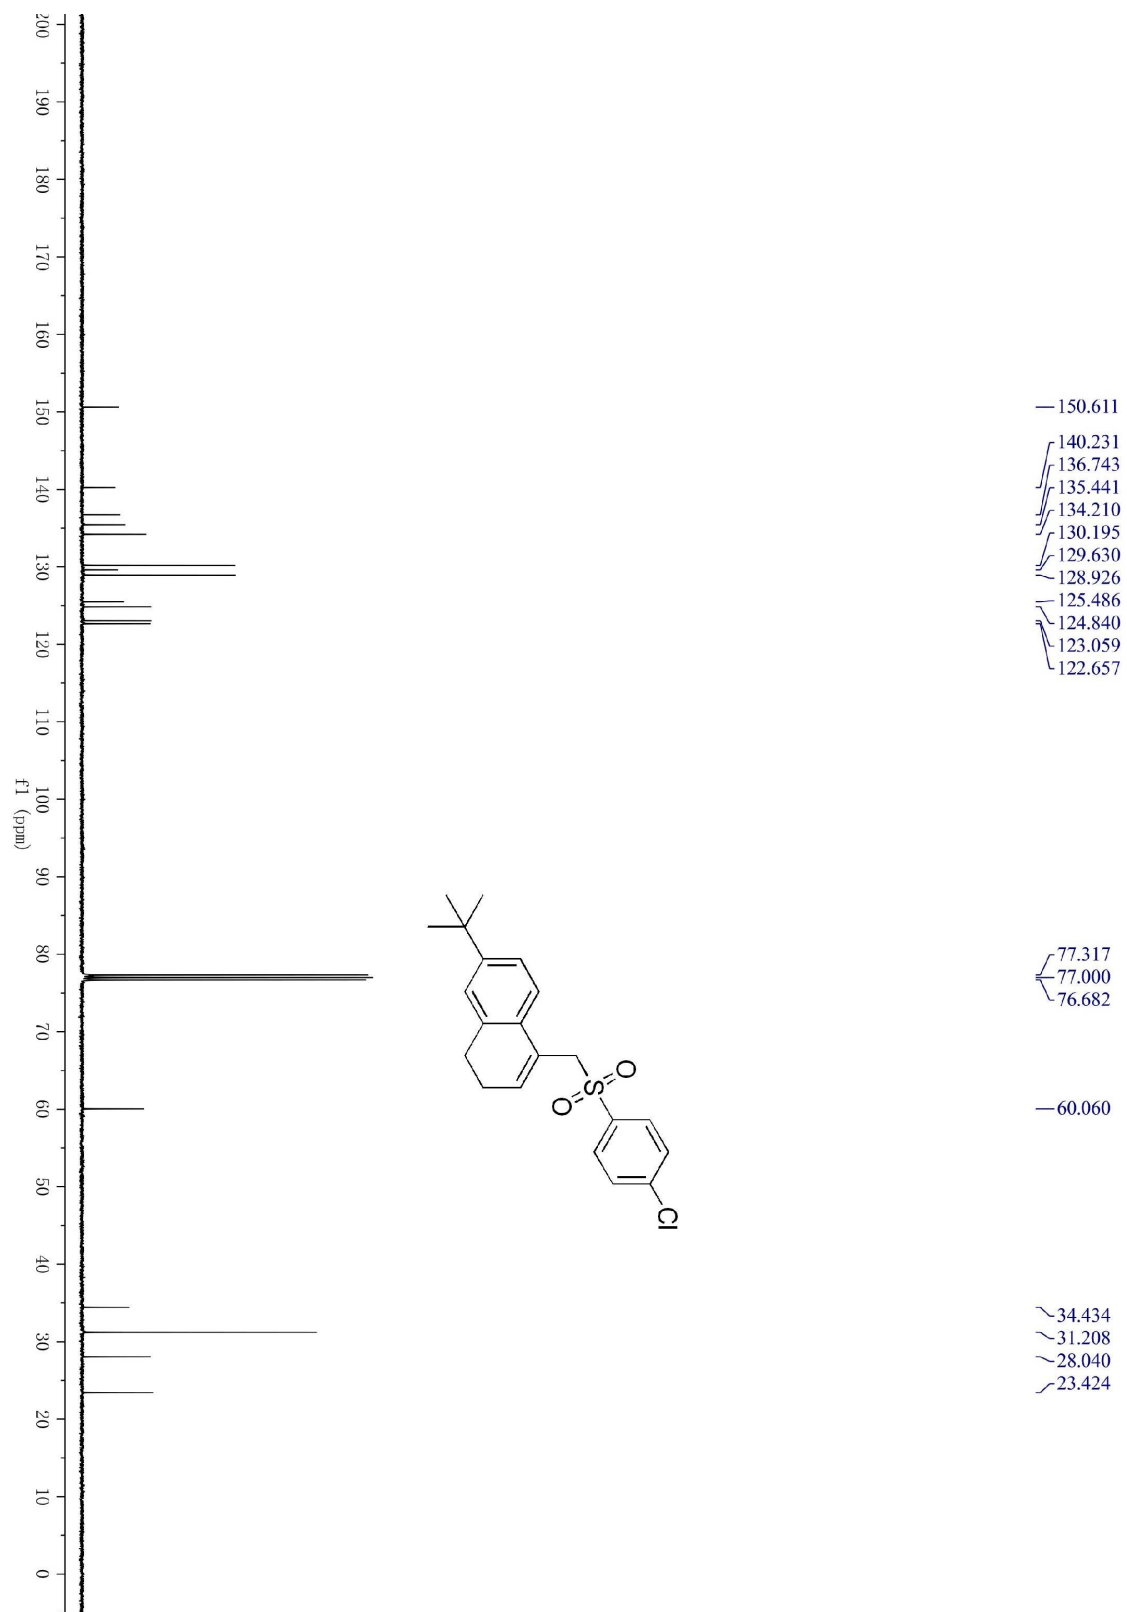



4-(((4-Chlorophenyl)sulfonyl)methyl)-7-fluoro-1,2-dihydronaphthalene (3hf)

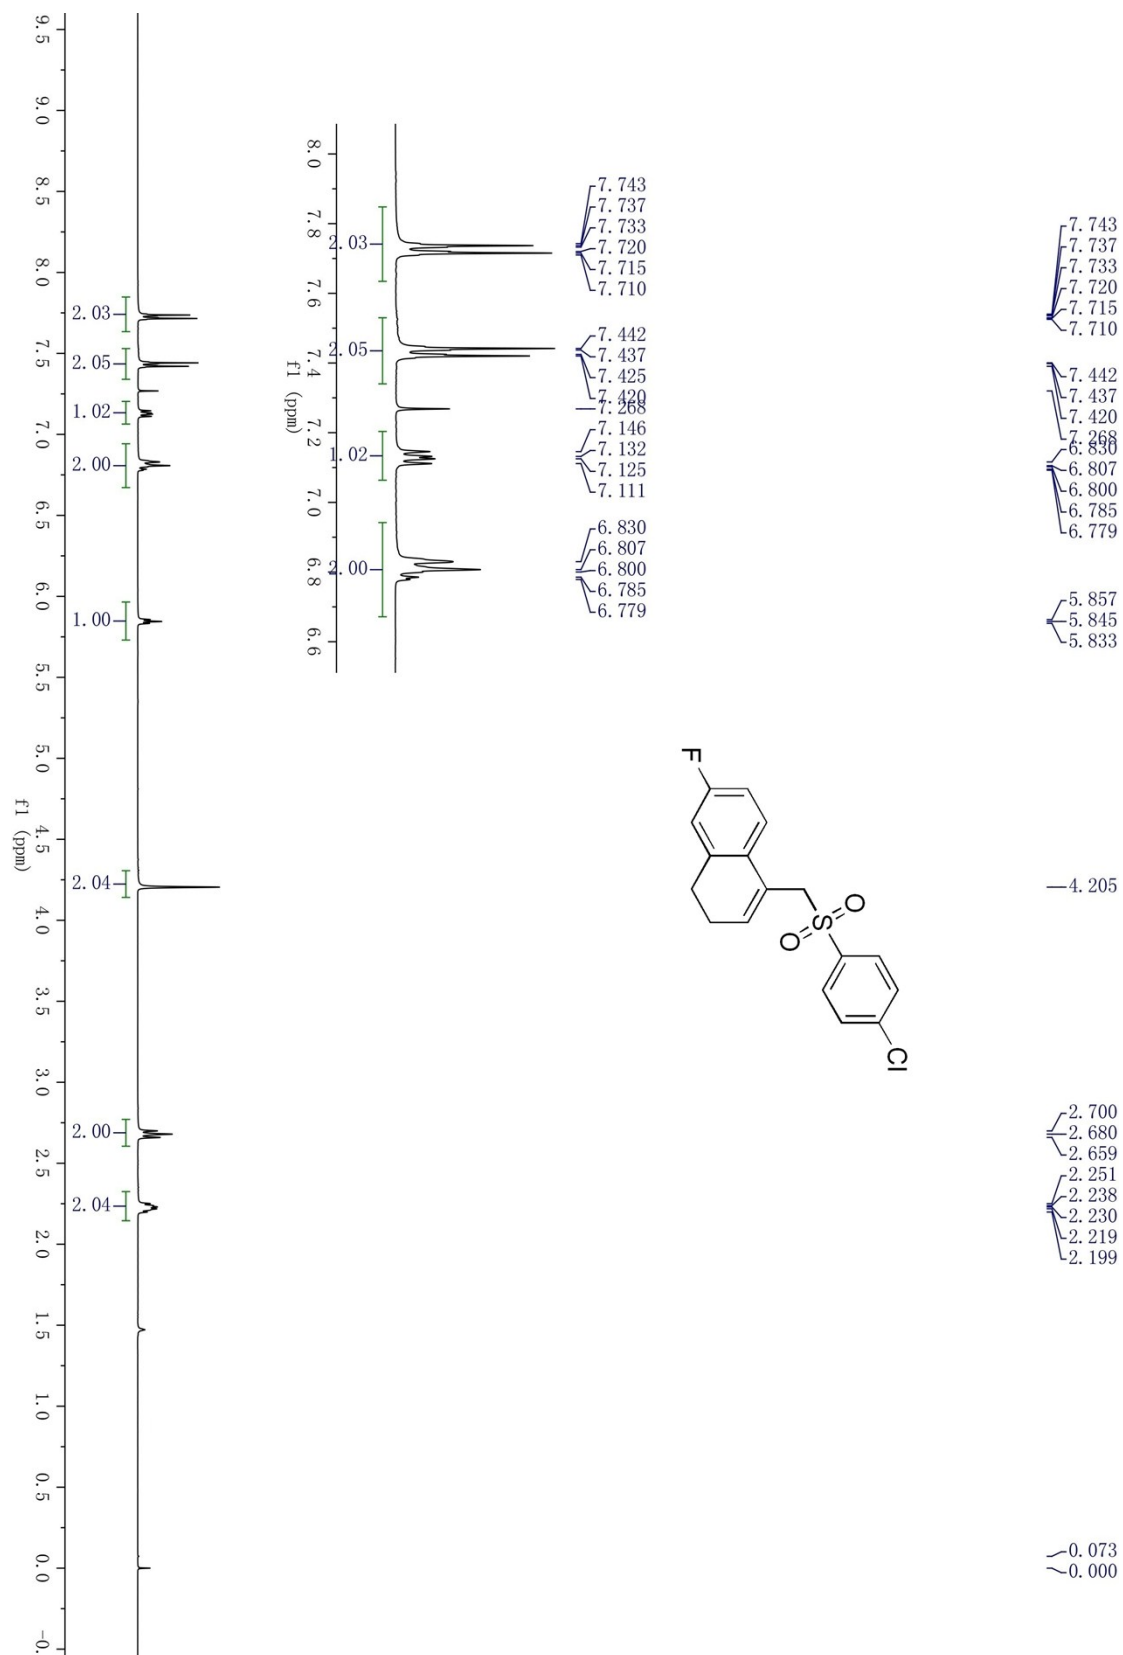

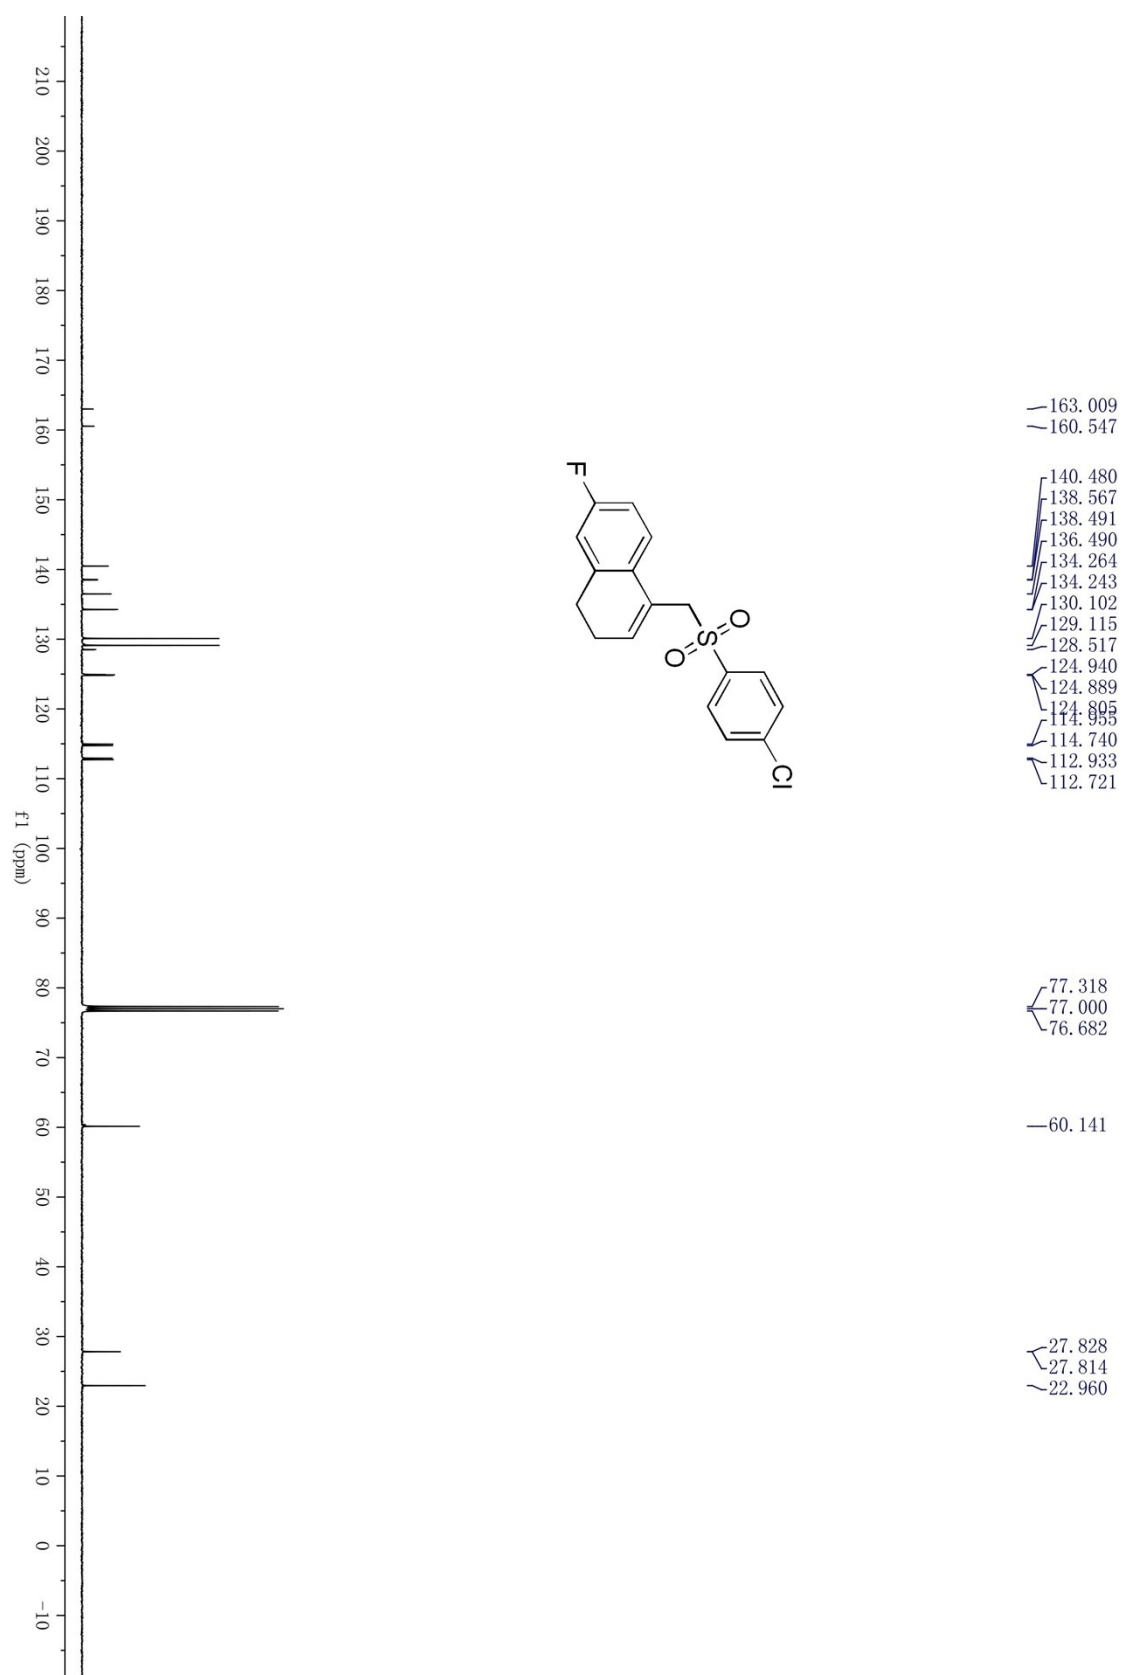

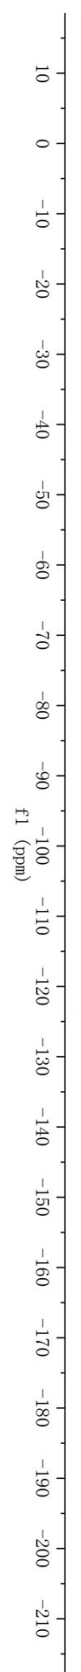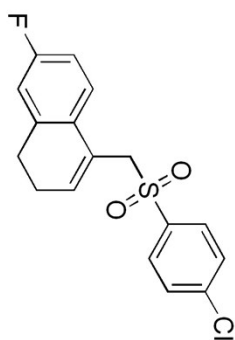

--114.101

7-Chloro-4-(((4-chlorophenyl)sulfonyl)methyl)-1,2-dihydronaphthalene (3if)

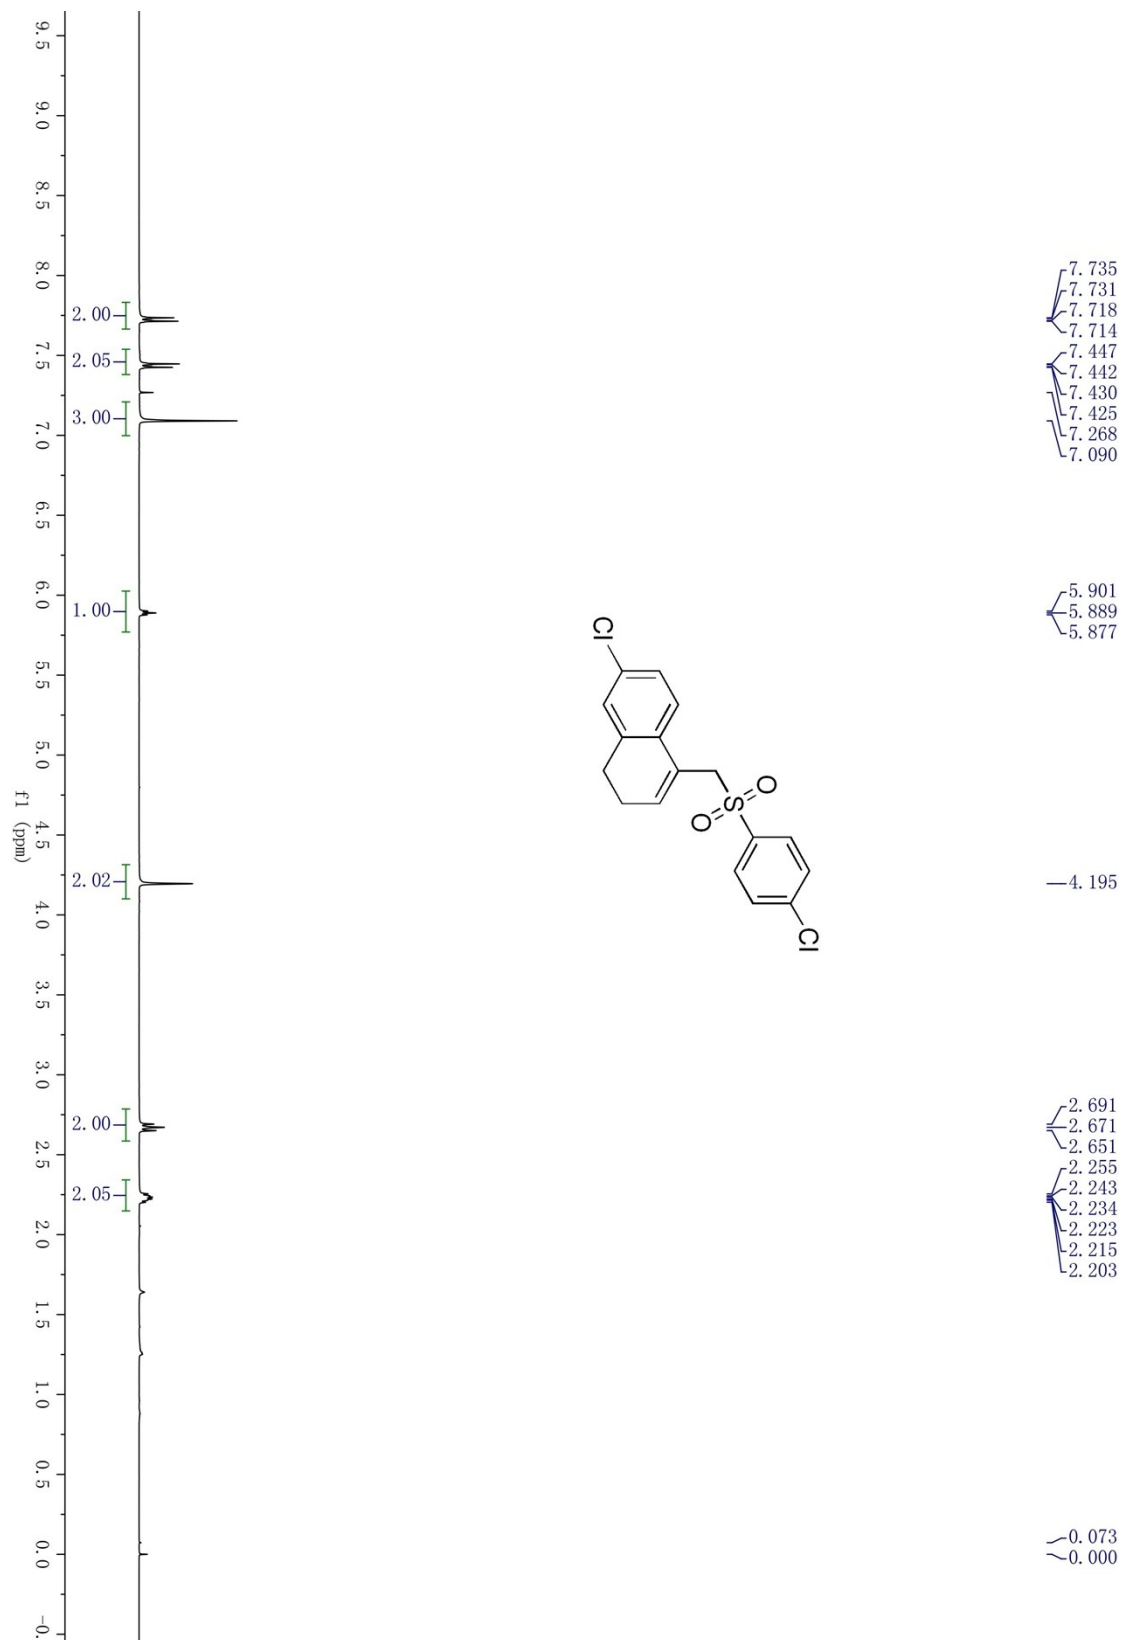

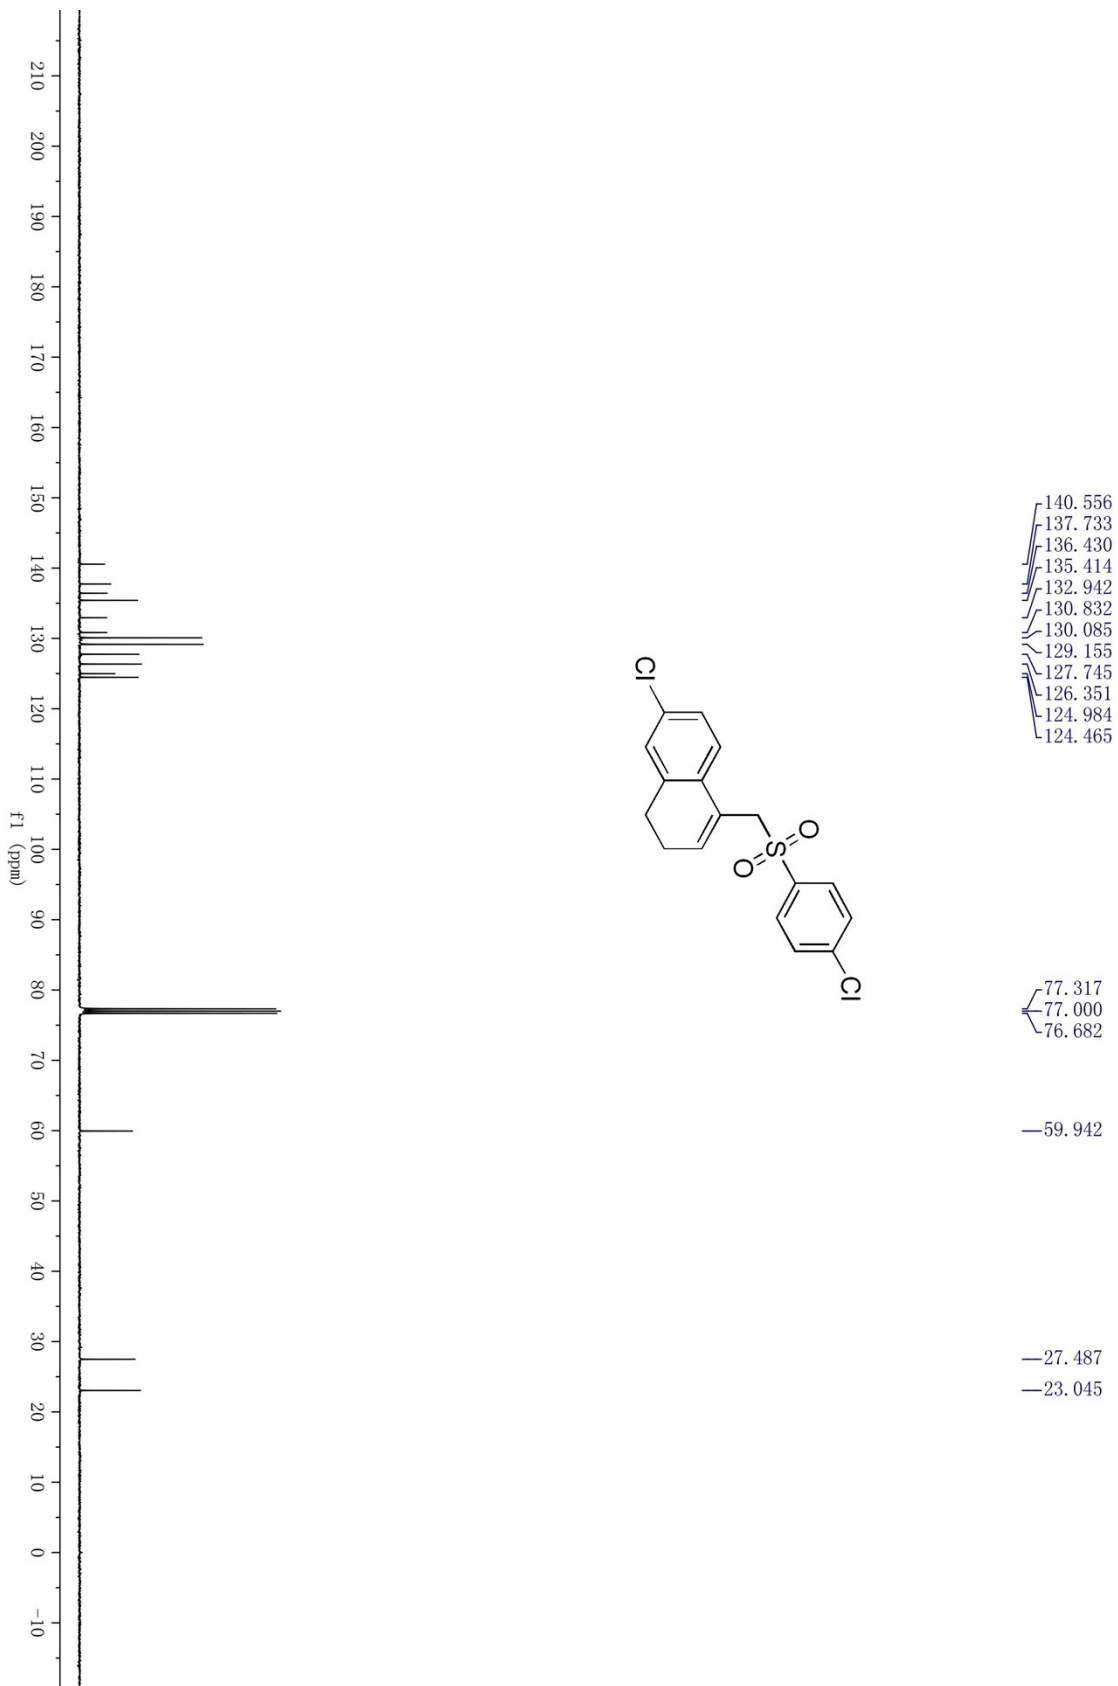

7-Bromo-4-(((4-chlorophenyl)sulfonyl)methyl)-1,2-dihydronaphthalene (3jf)

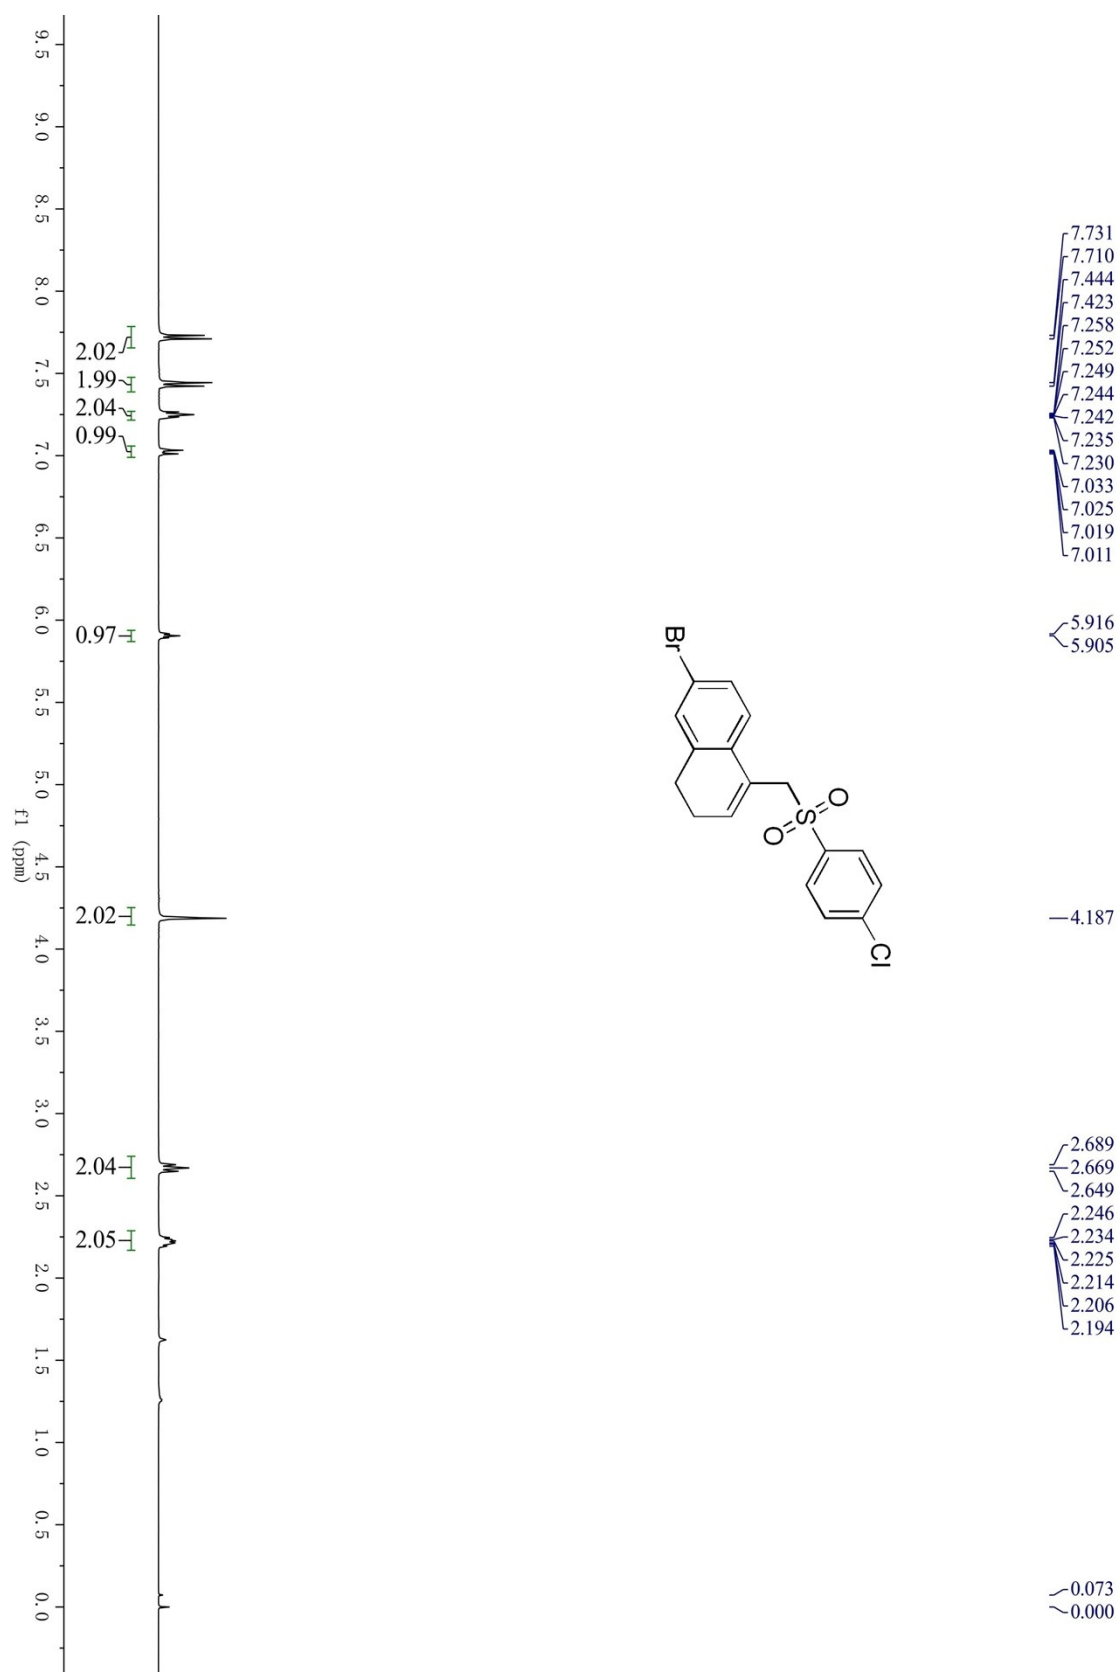

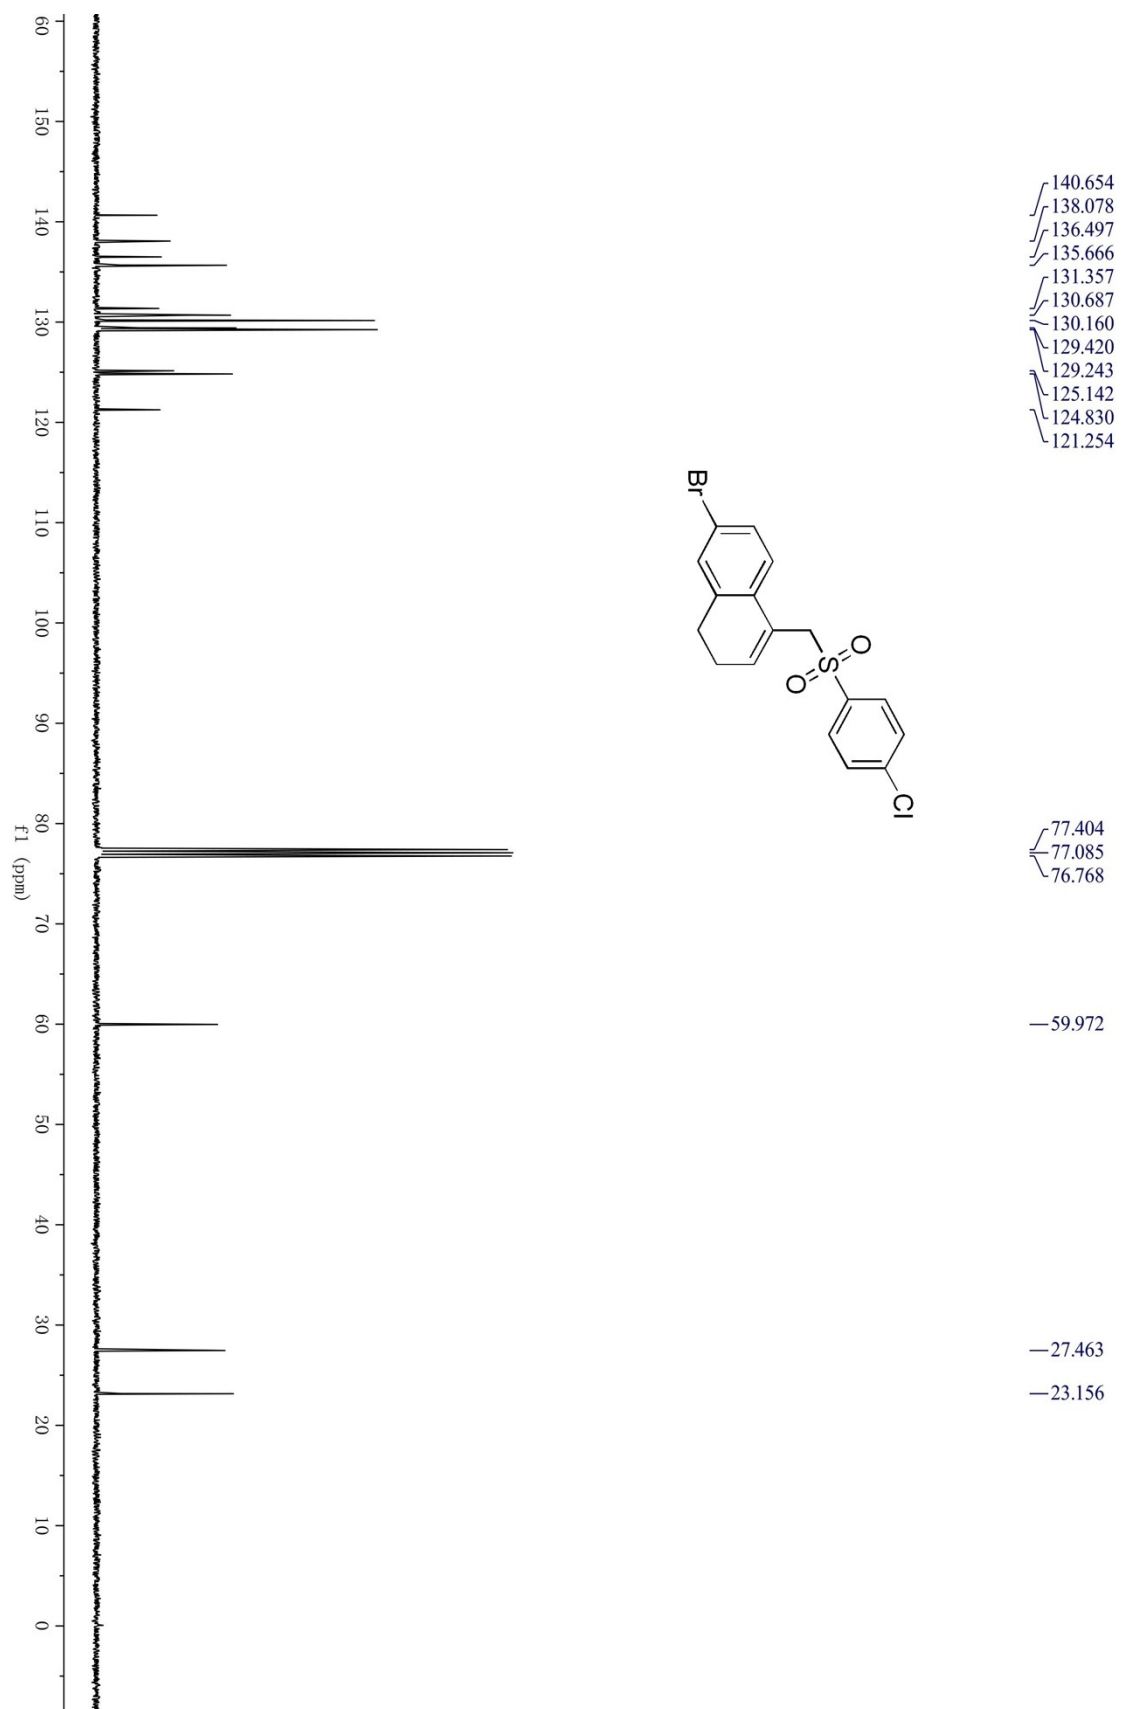

4-(((4-chlorophenyl)sulfonyl)methyl)-7-(trifluoromethyl)-1,2-dihydronaphthalene (3kf)

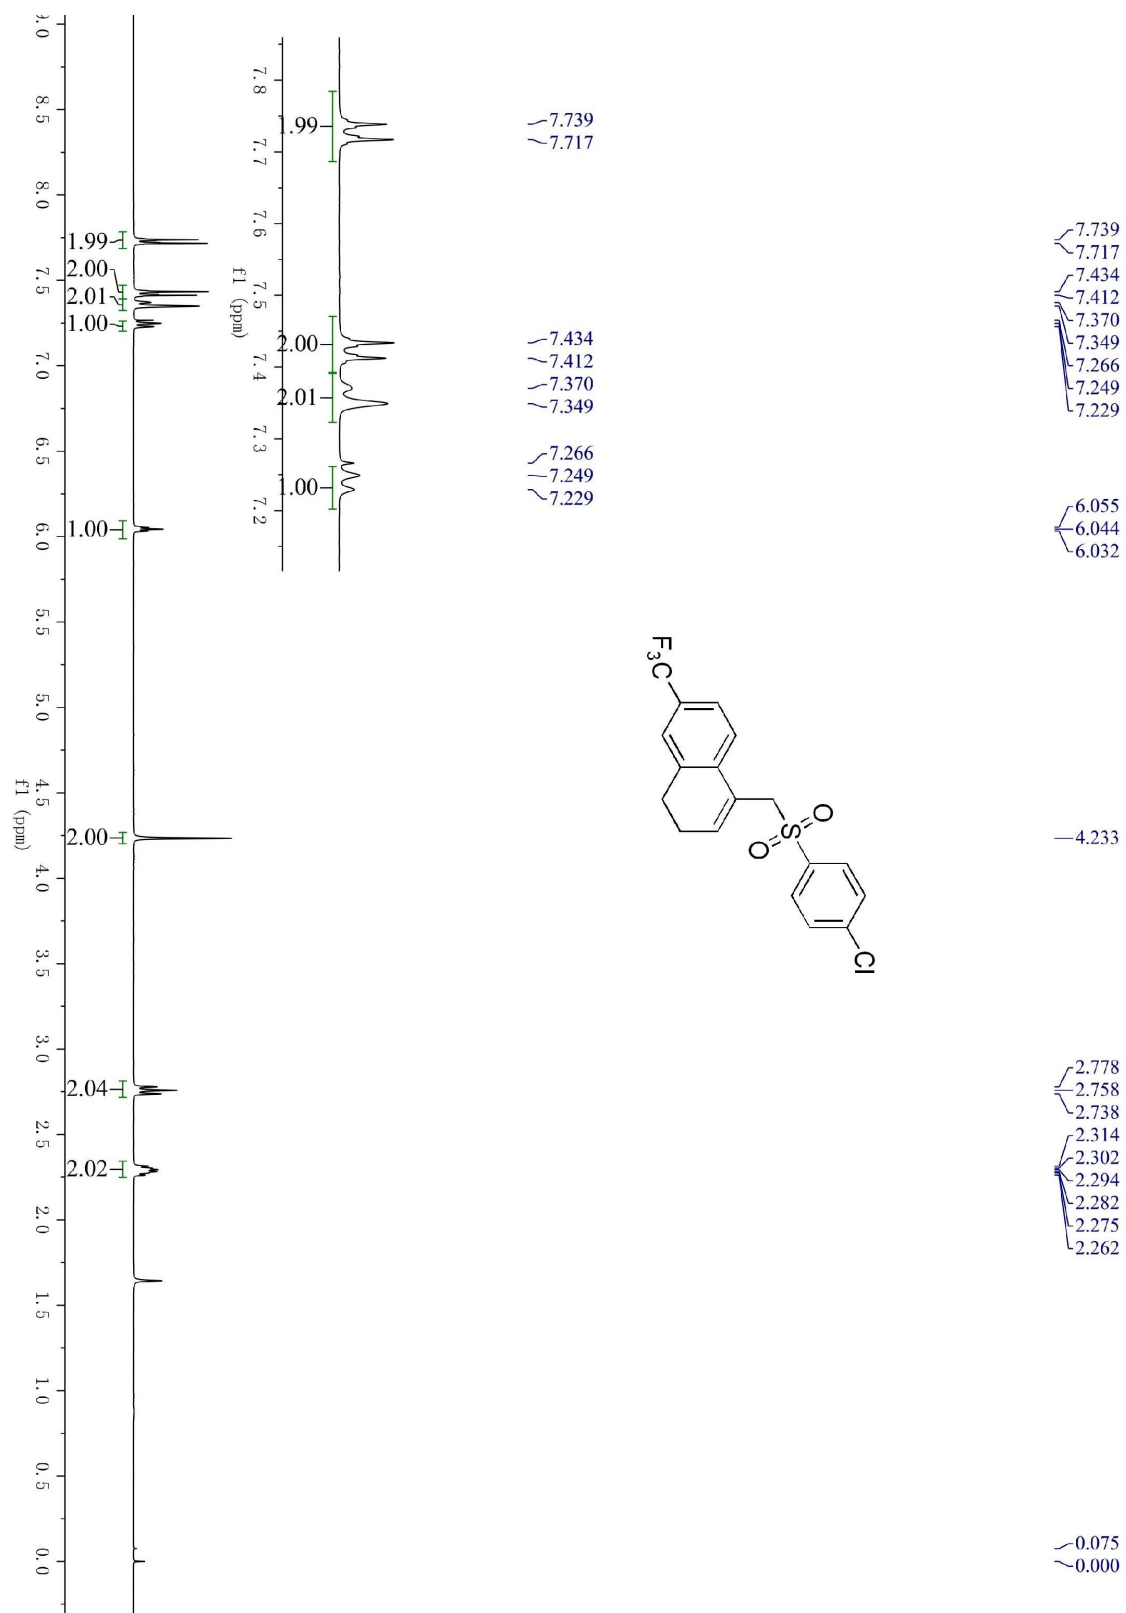



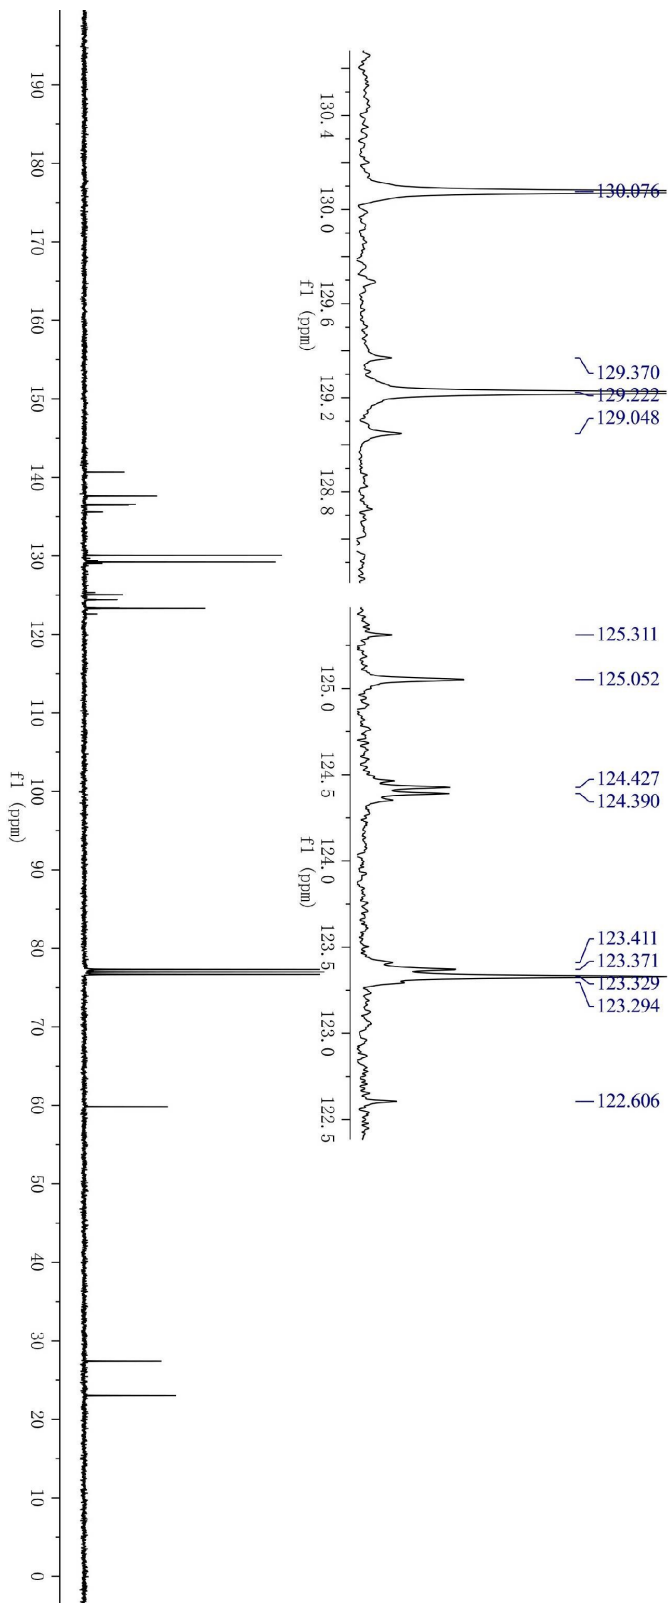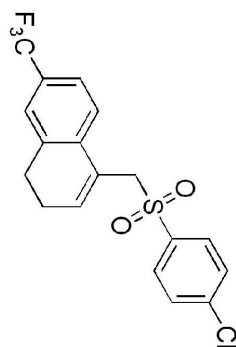

- 140.677
- 137.622
- 136.545
- 136.470
- 135.611
- 130.076
- 129.370
- 129.222
- 129.048
- 125.311
- 125.052
- 124.427
- 124.390
- 123.411
- 123.371
- 123.329
- 123.294
- 122.606

- 77.318
- 77.000
- 76.682

- 59.829

- 27.420

- 23.031

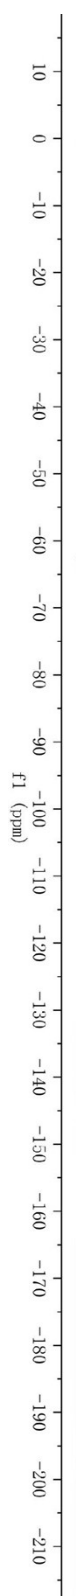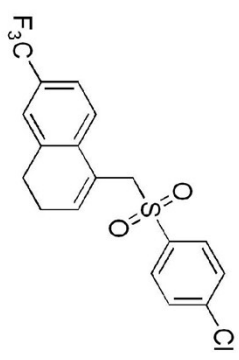

-62.610

1-(((4-chlorophenyl)sulfonyl)methyl)-3,4-dihydrophenanthrene (3lf)

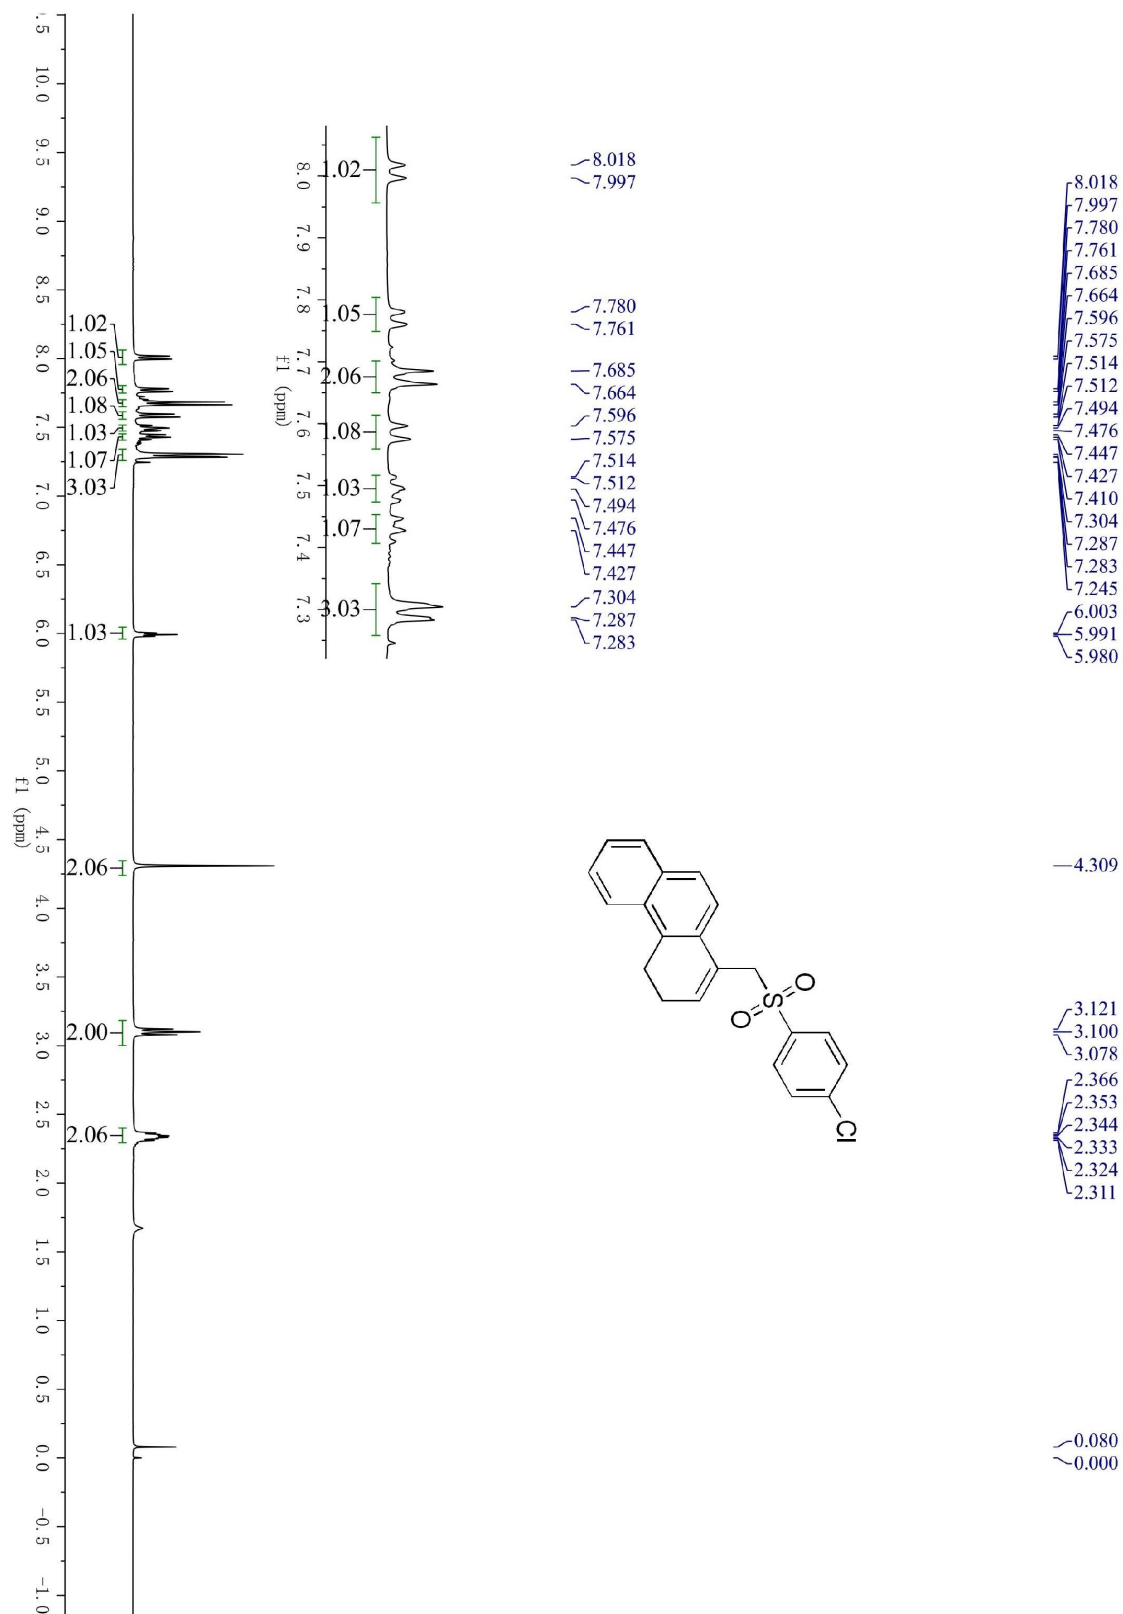

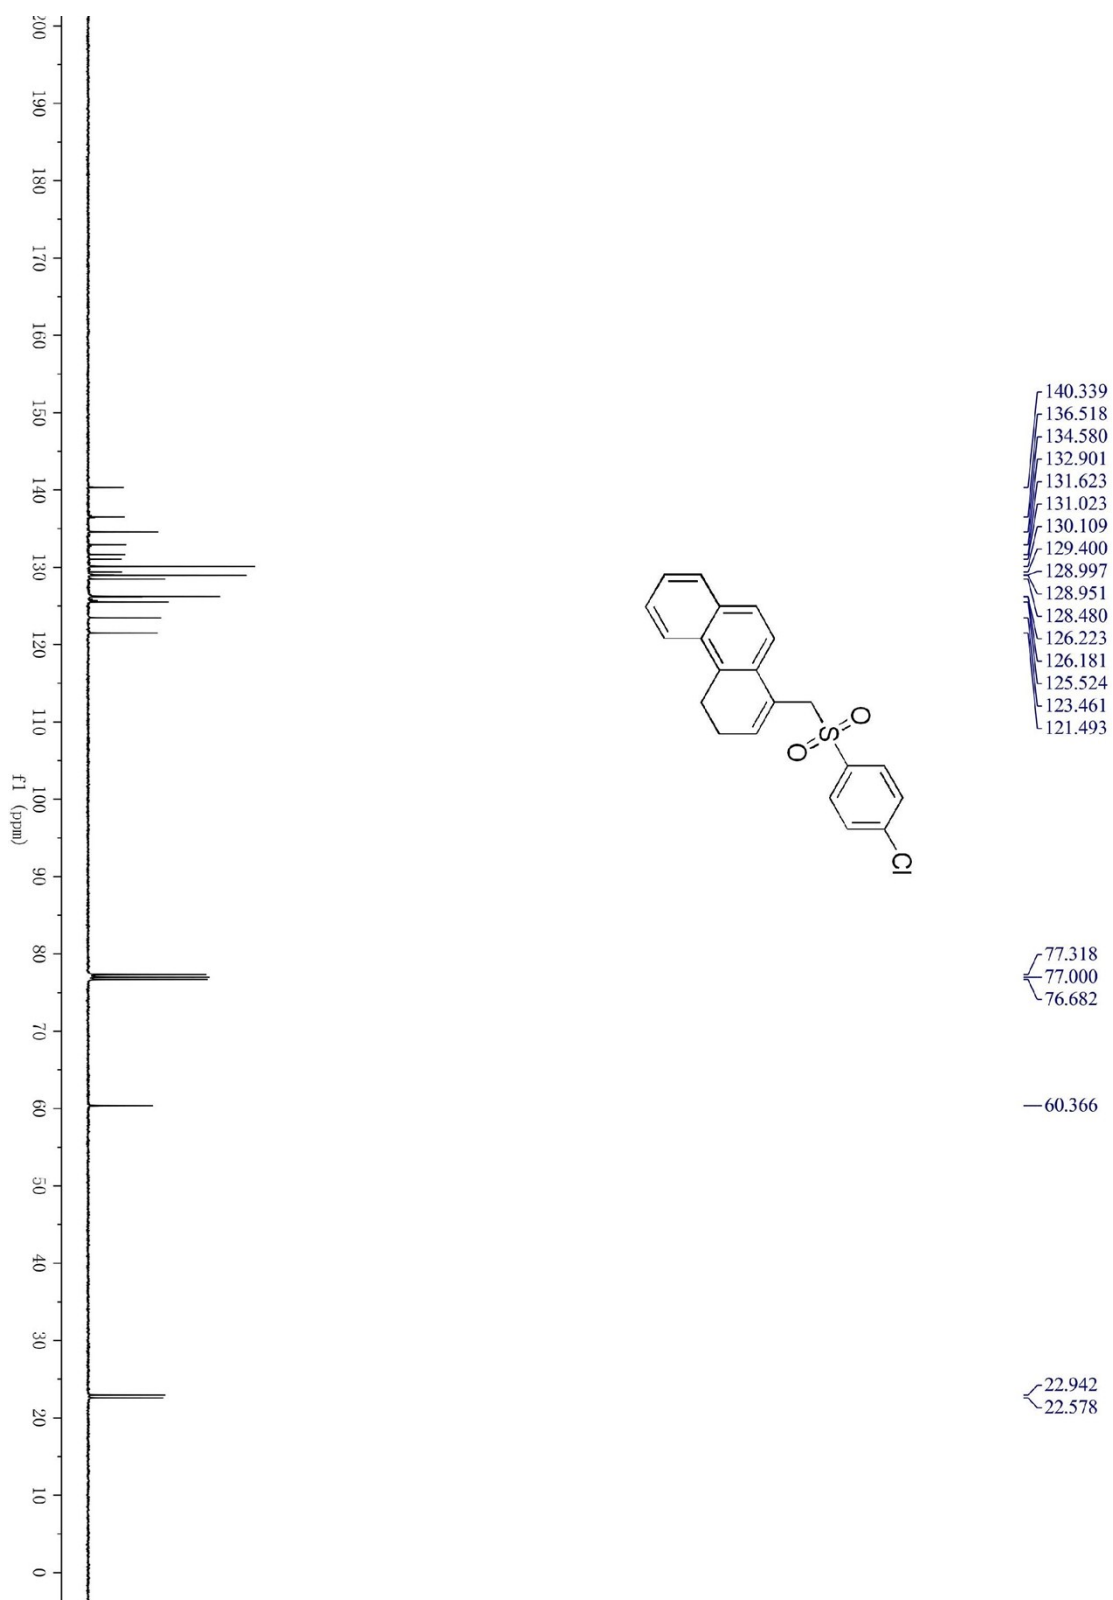

5-((4-chlorophenyl)sulfonyl)methylisoquinoline (3mf)

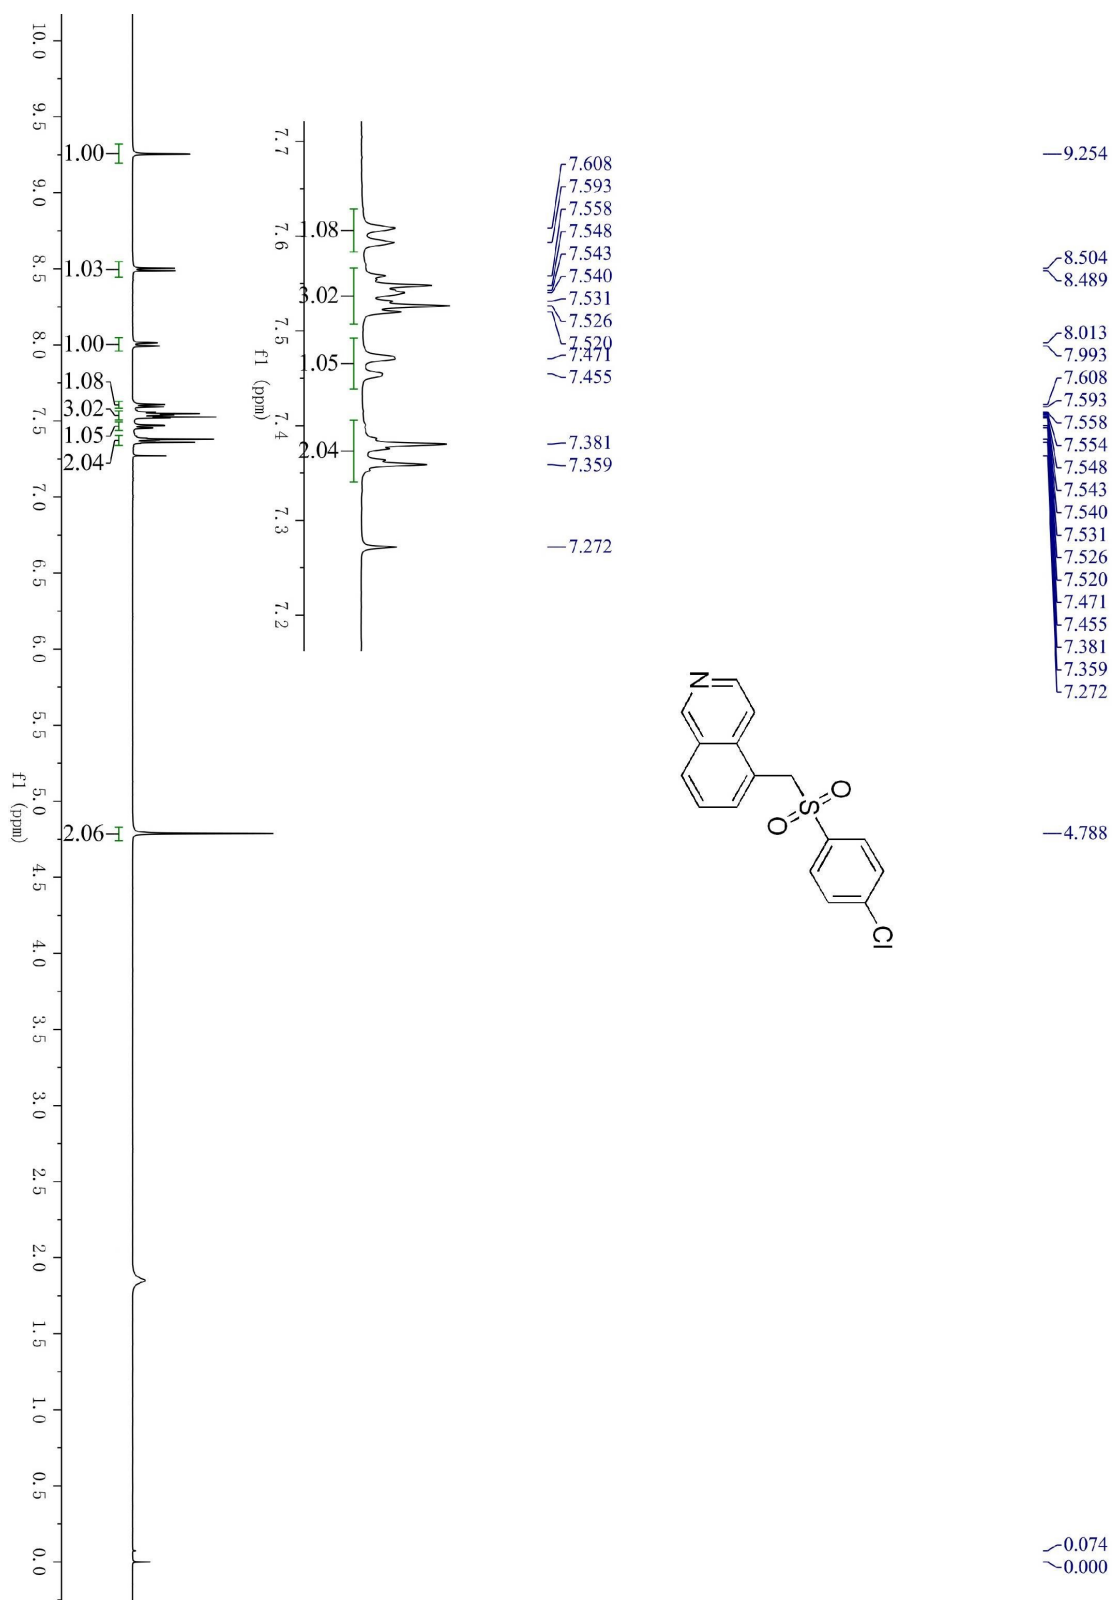

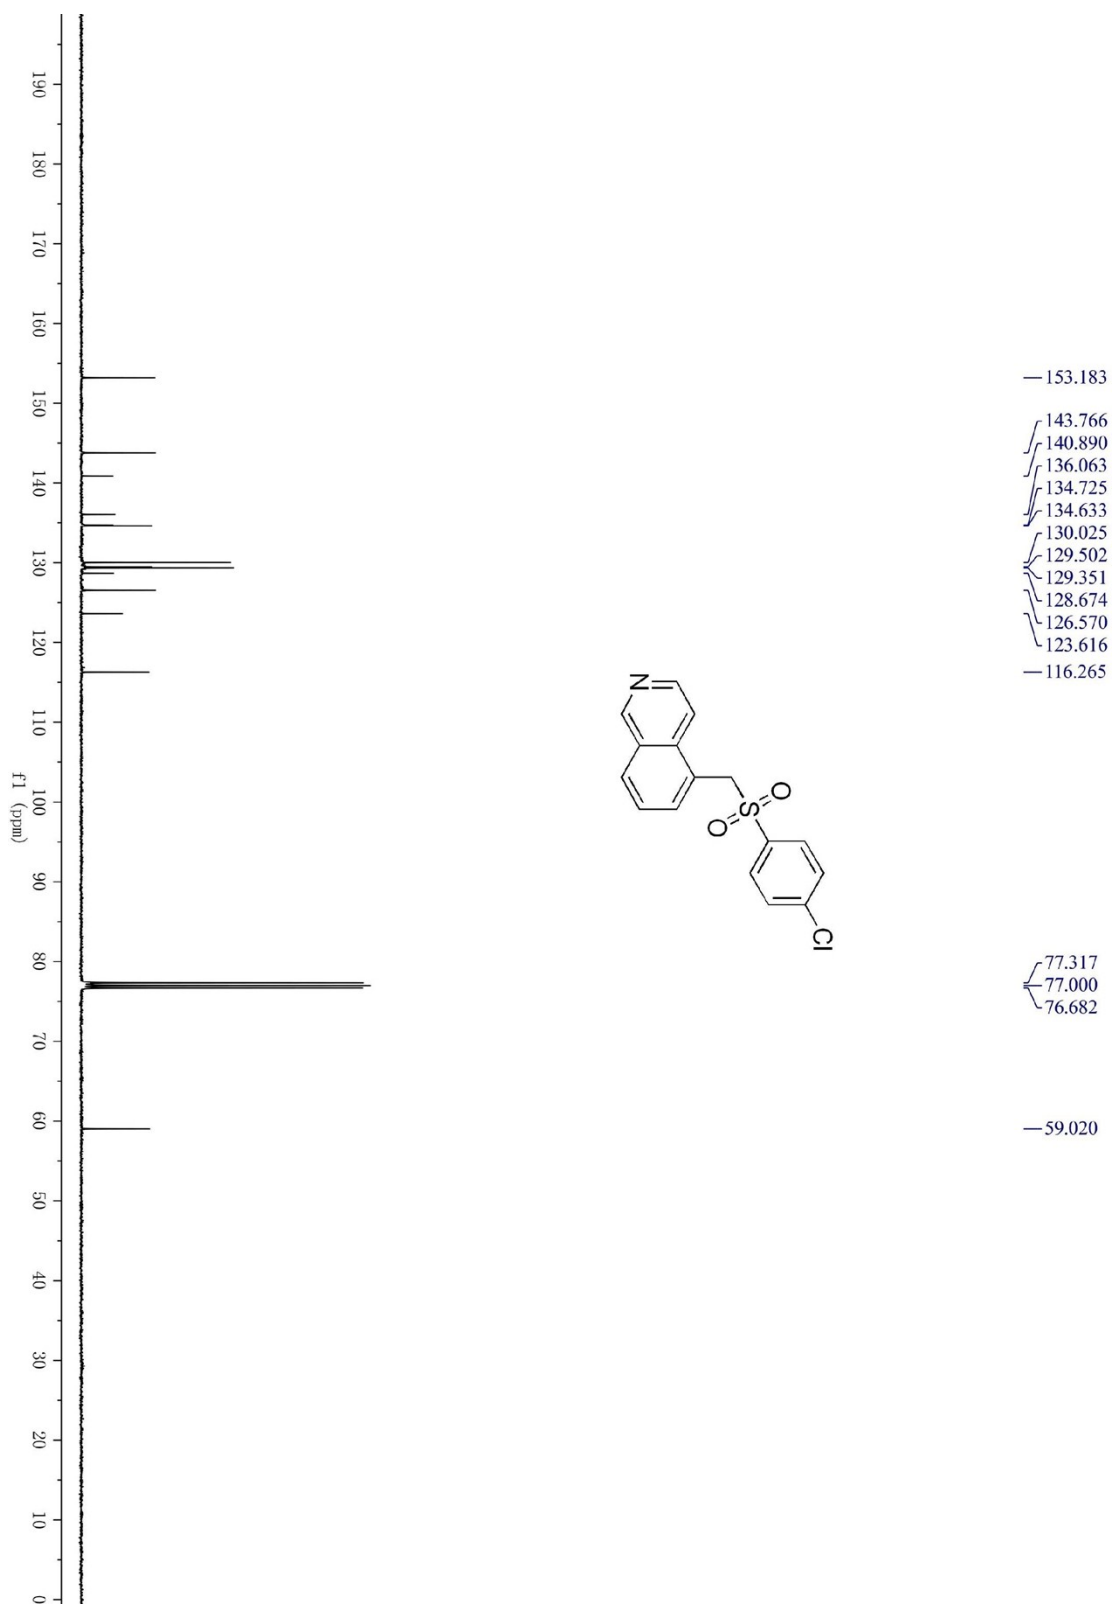

5-(((4-chlorophenyl)sulfonyl)methyl)-7,8-dihydroquinoline (3nf)

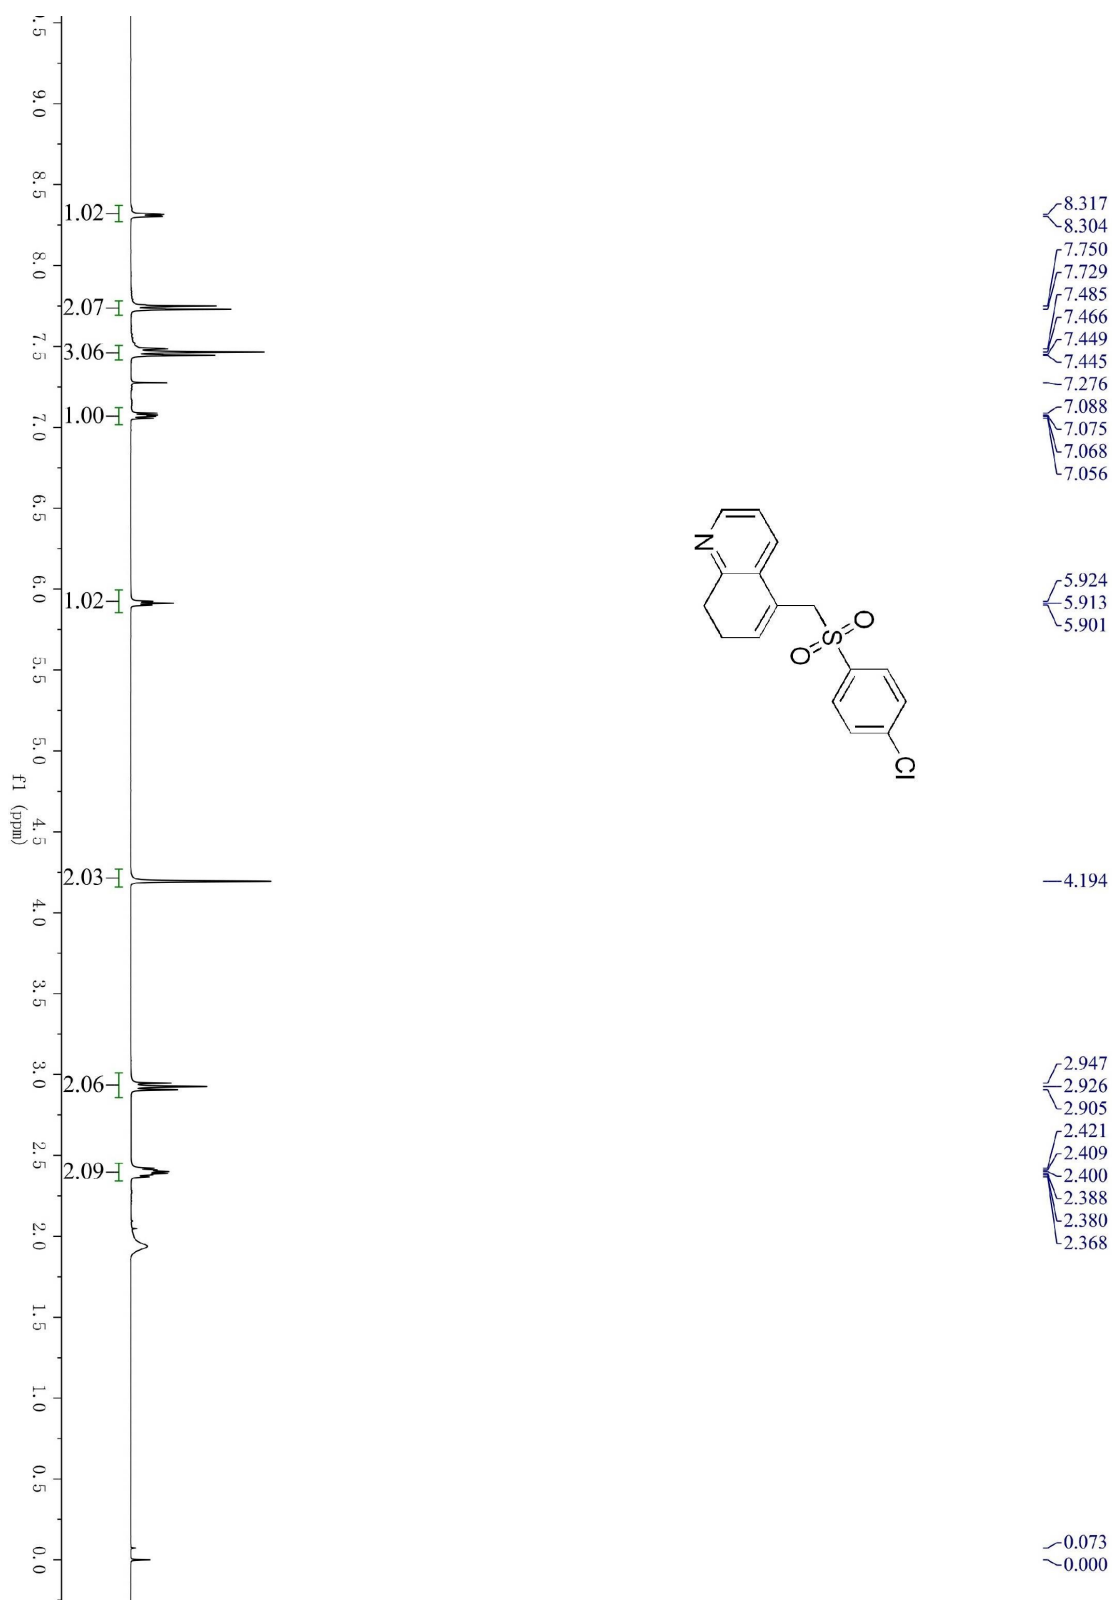

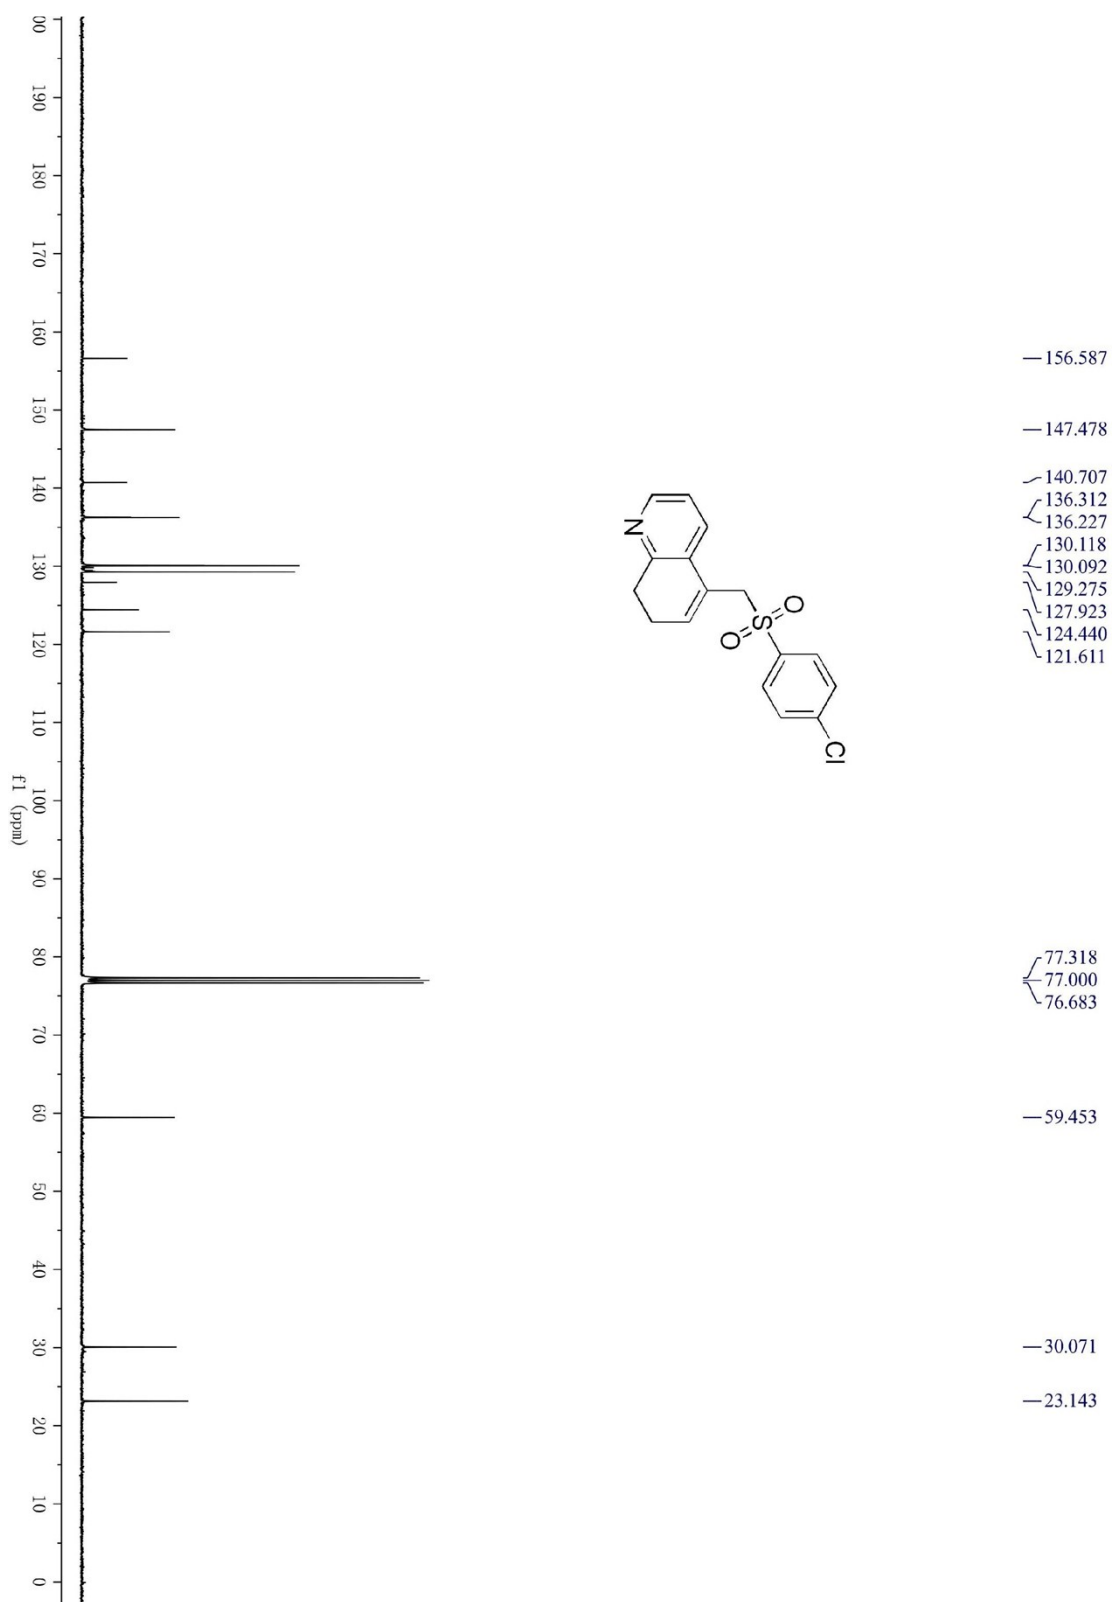



8-(((4-chlorophenyl)sulfonyl)methyl)-5,6-dihydroquinoline (3of)

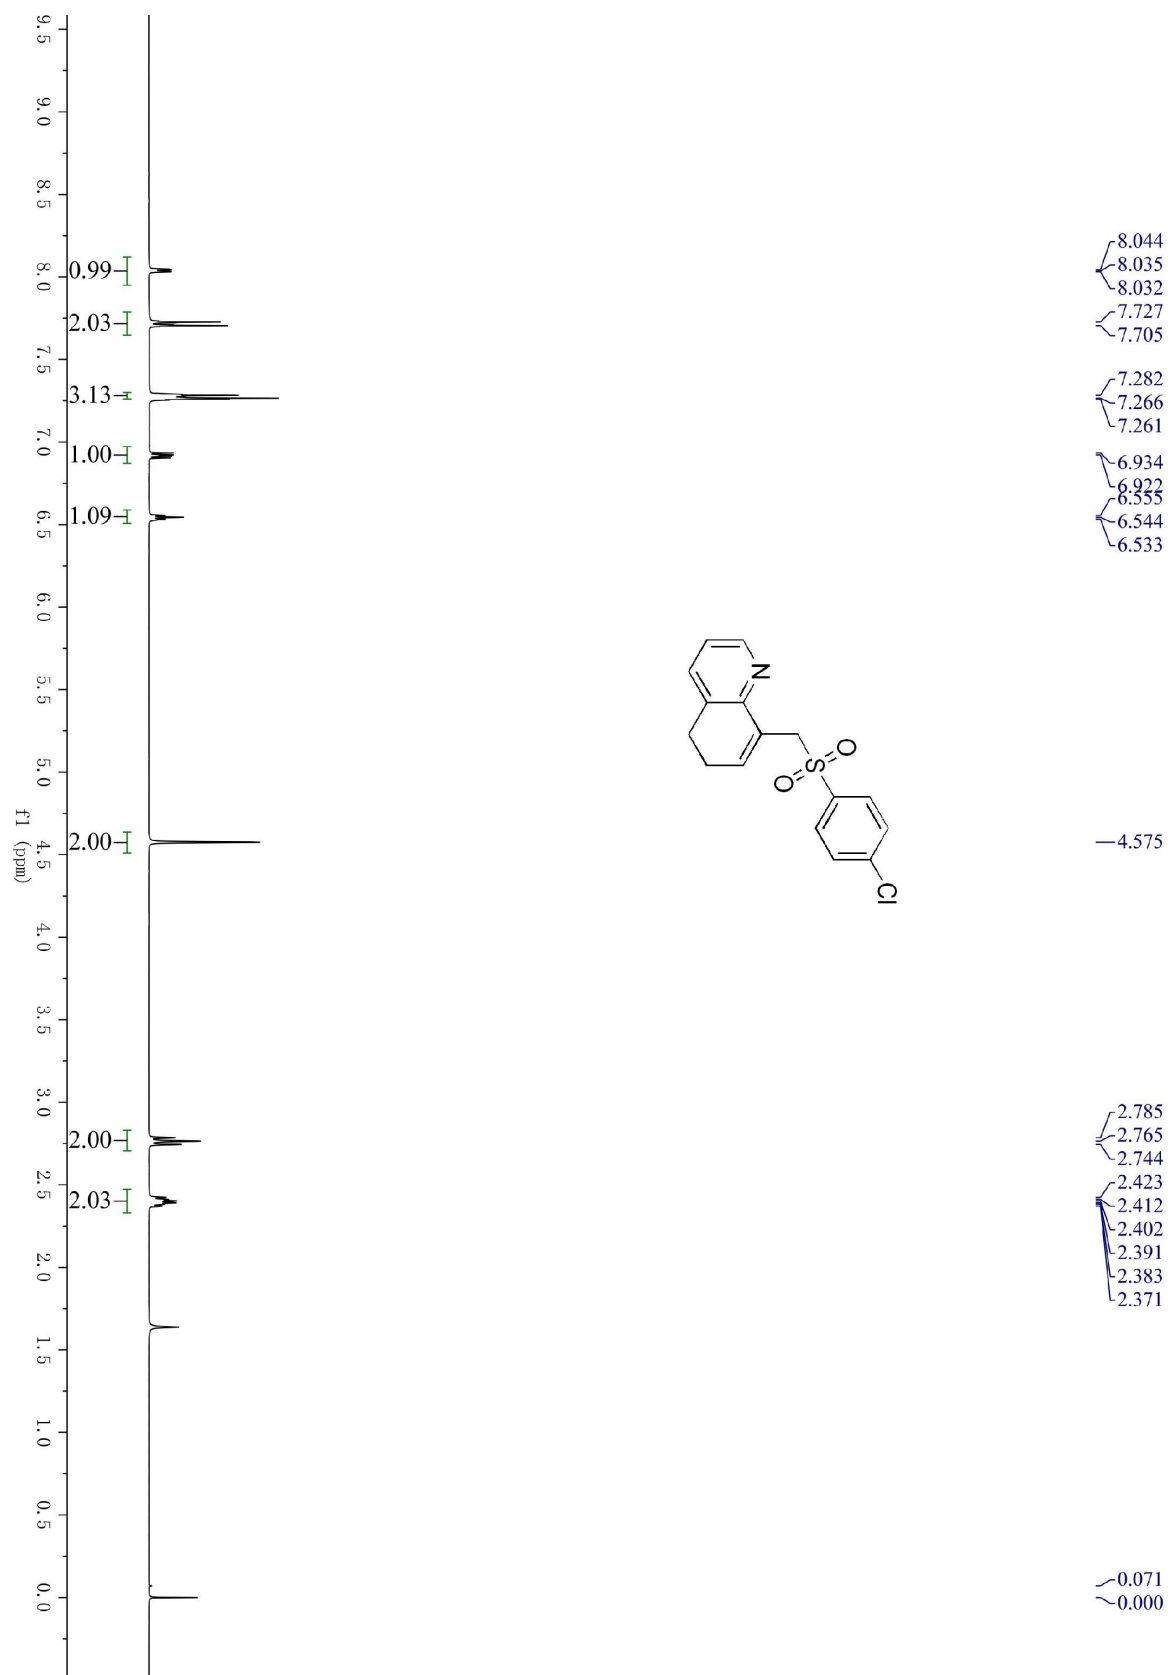

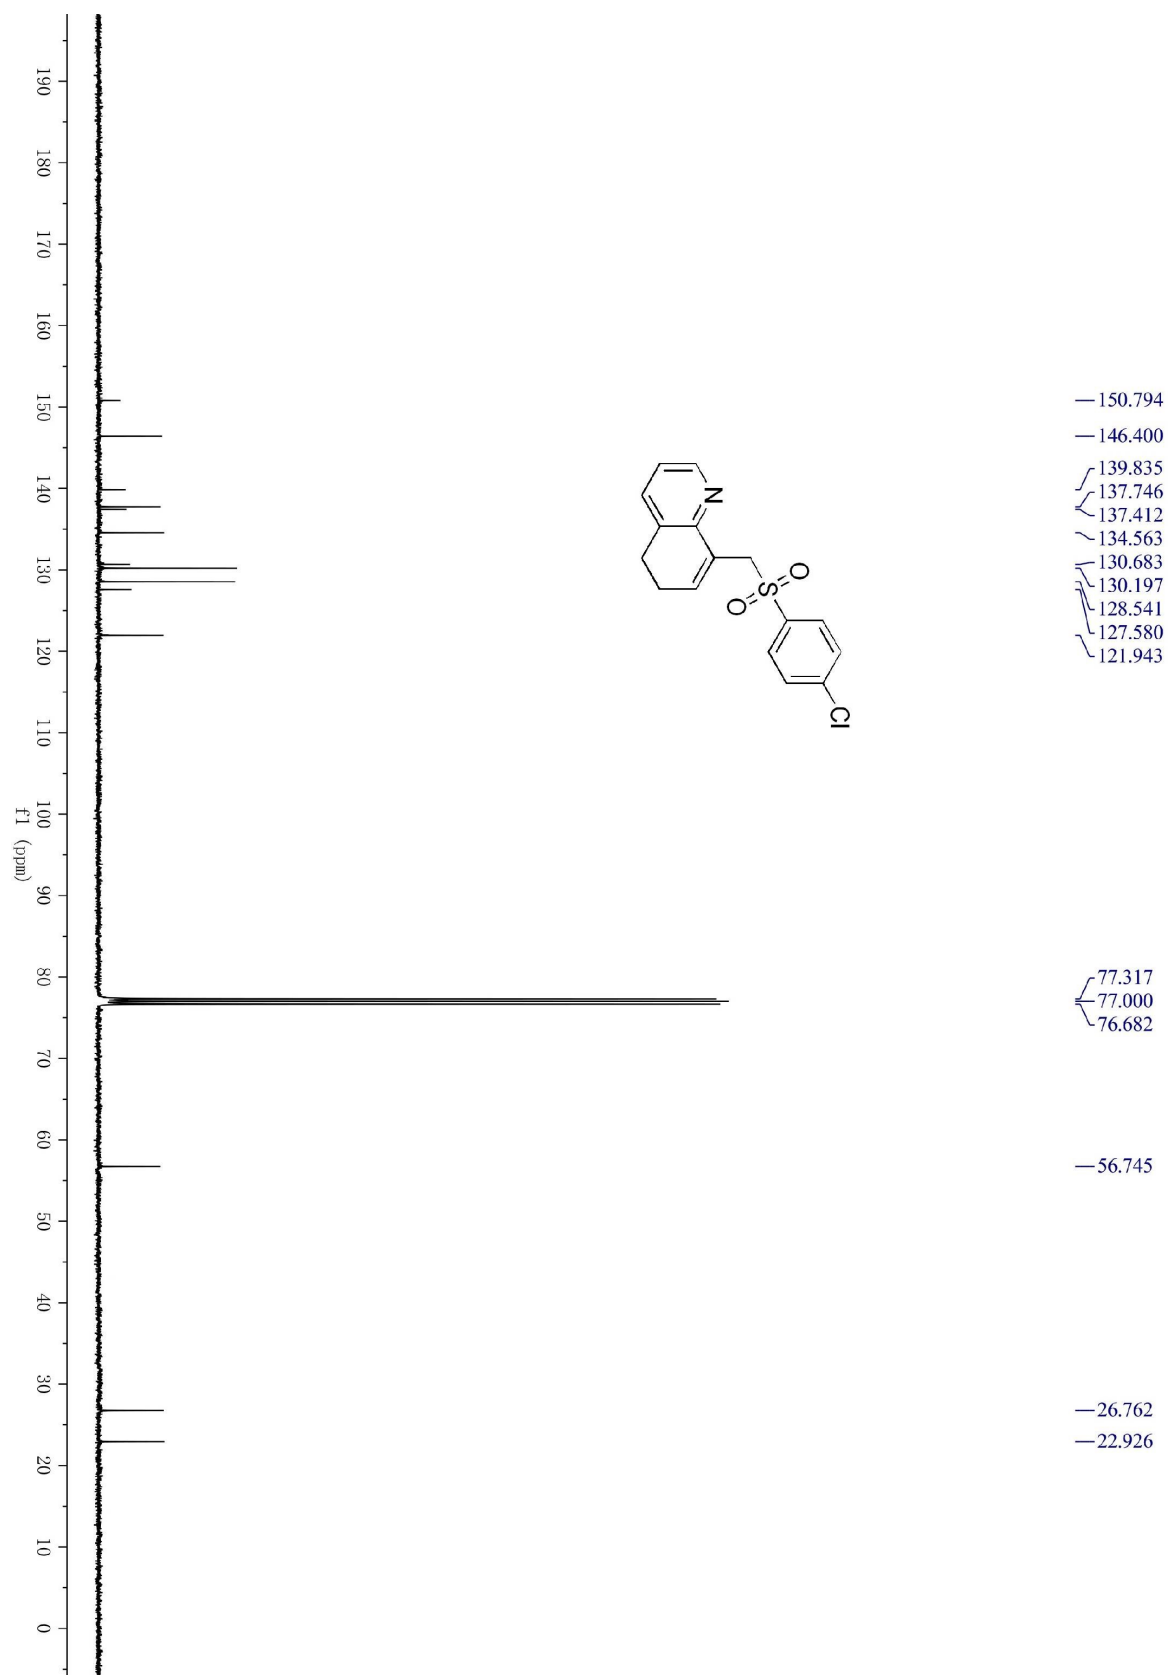

7-(((4-Chlorophenyl)sulfonyl)methyl)-4,5-dihydrobenzo[b]thiophene (3pf)

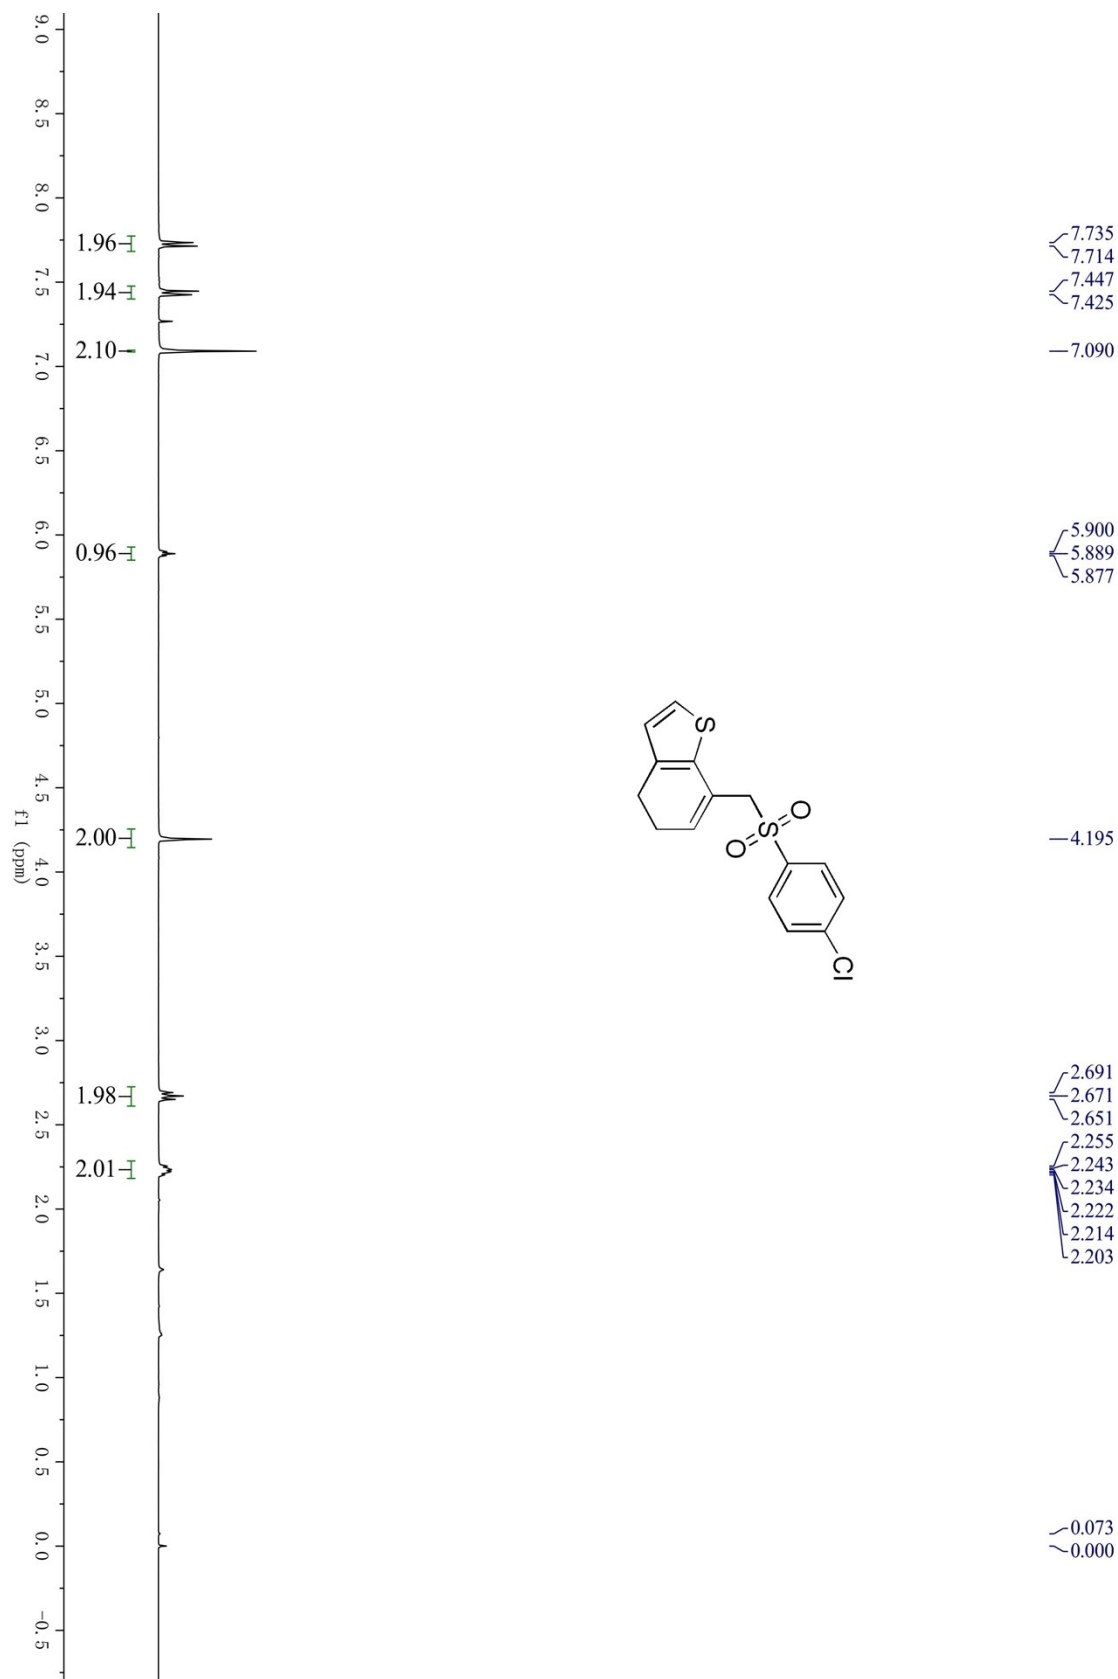

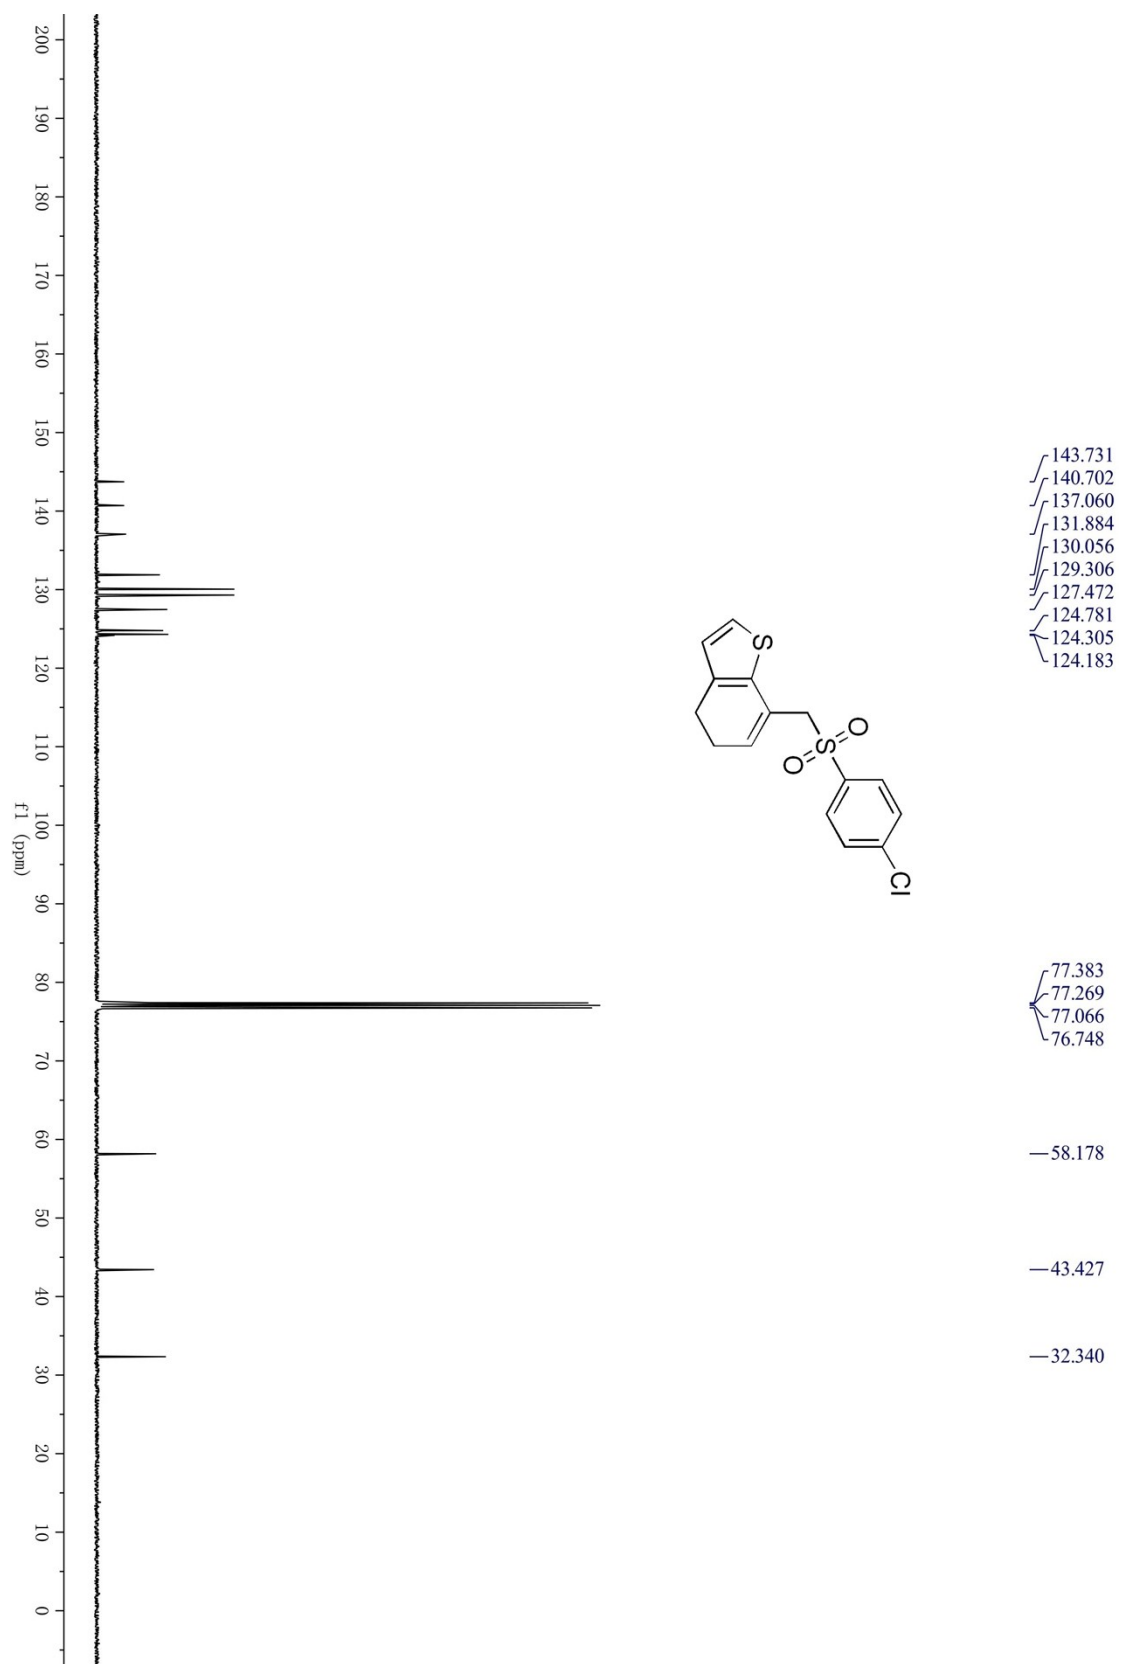

(2-(phenylsulfonyl)ethene-1,1-diyl)dibenzene (4)

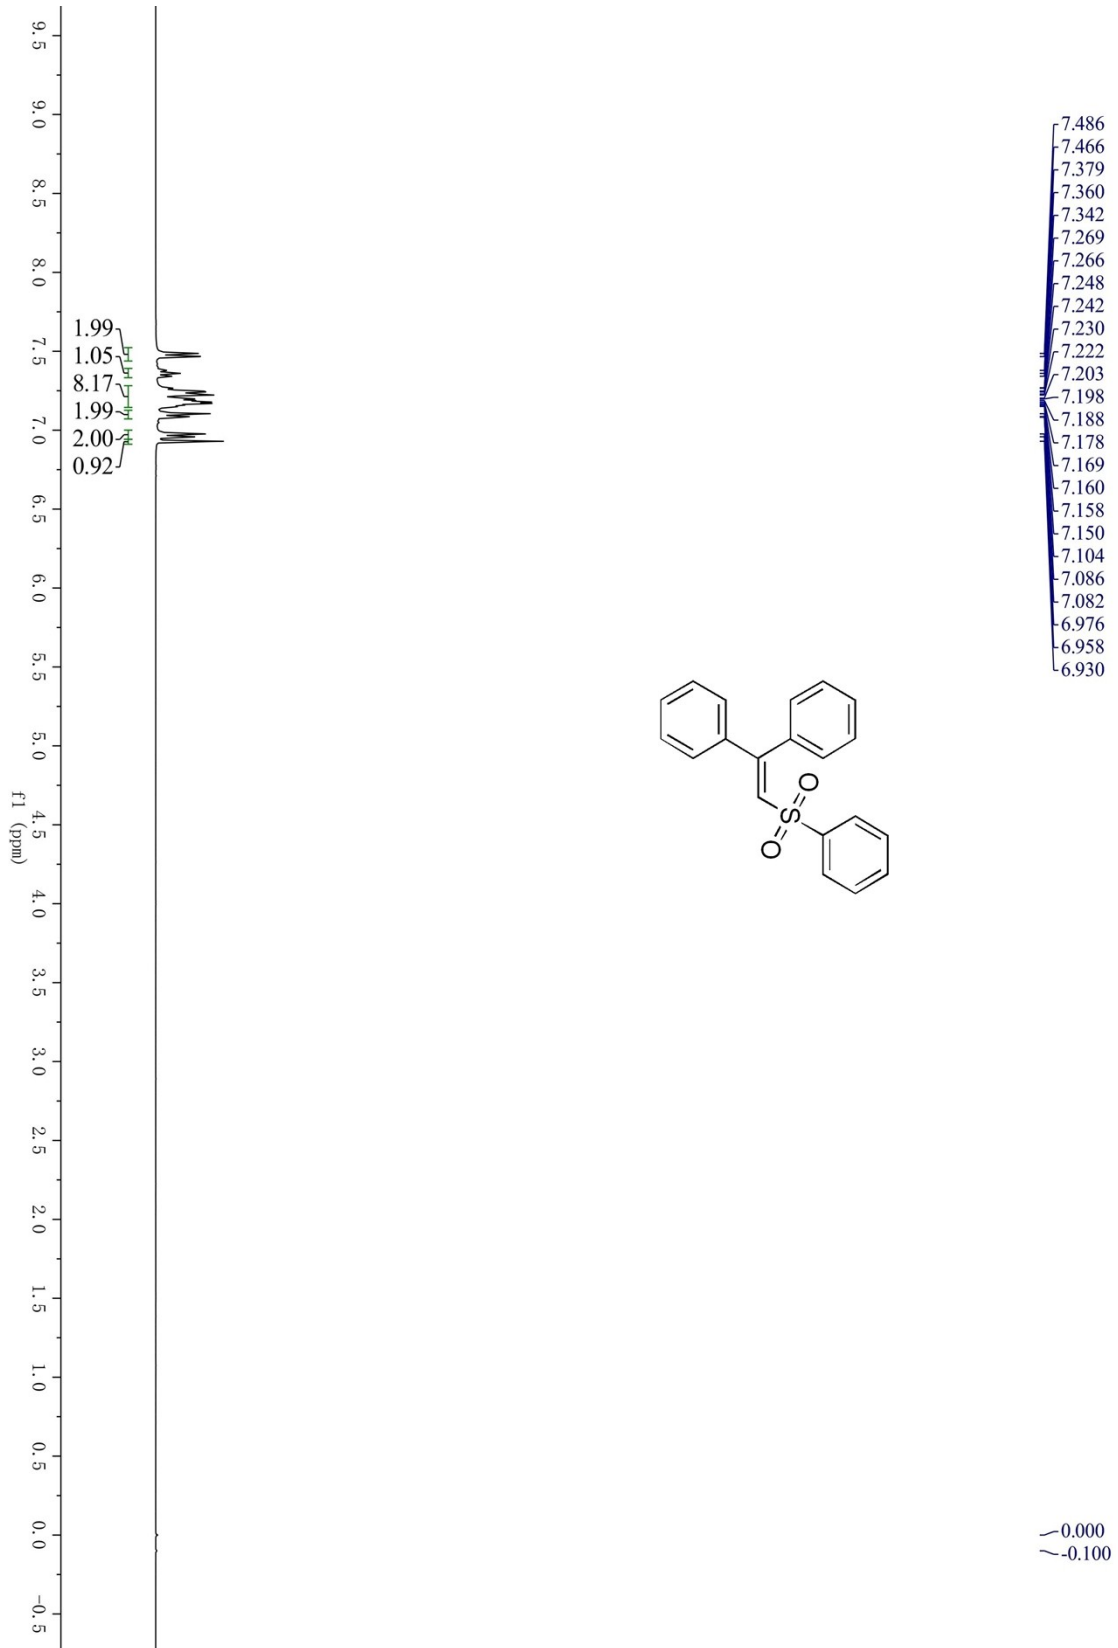

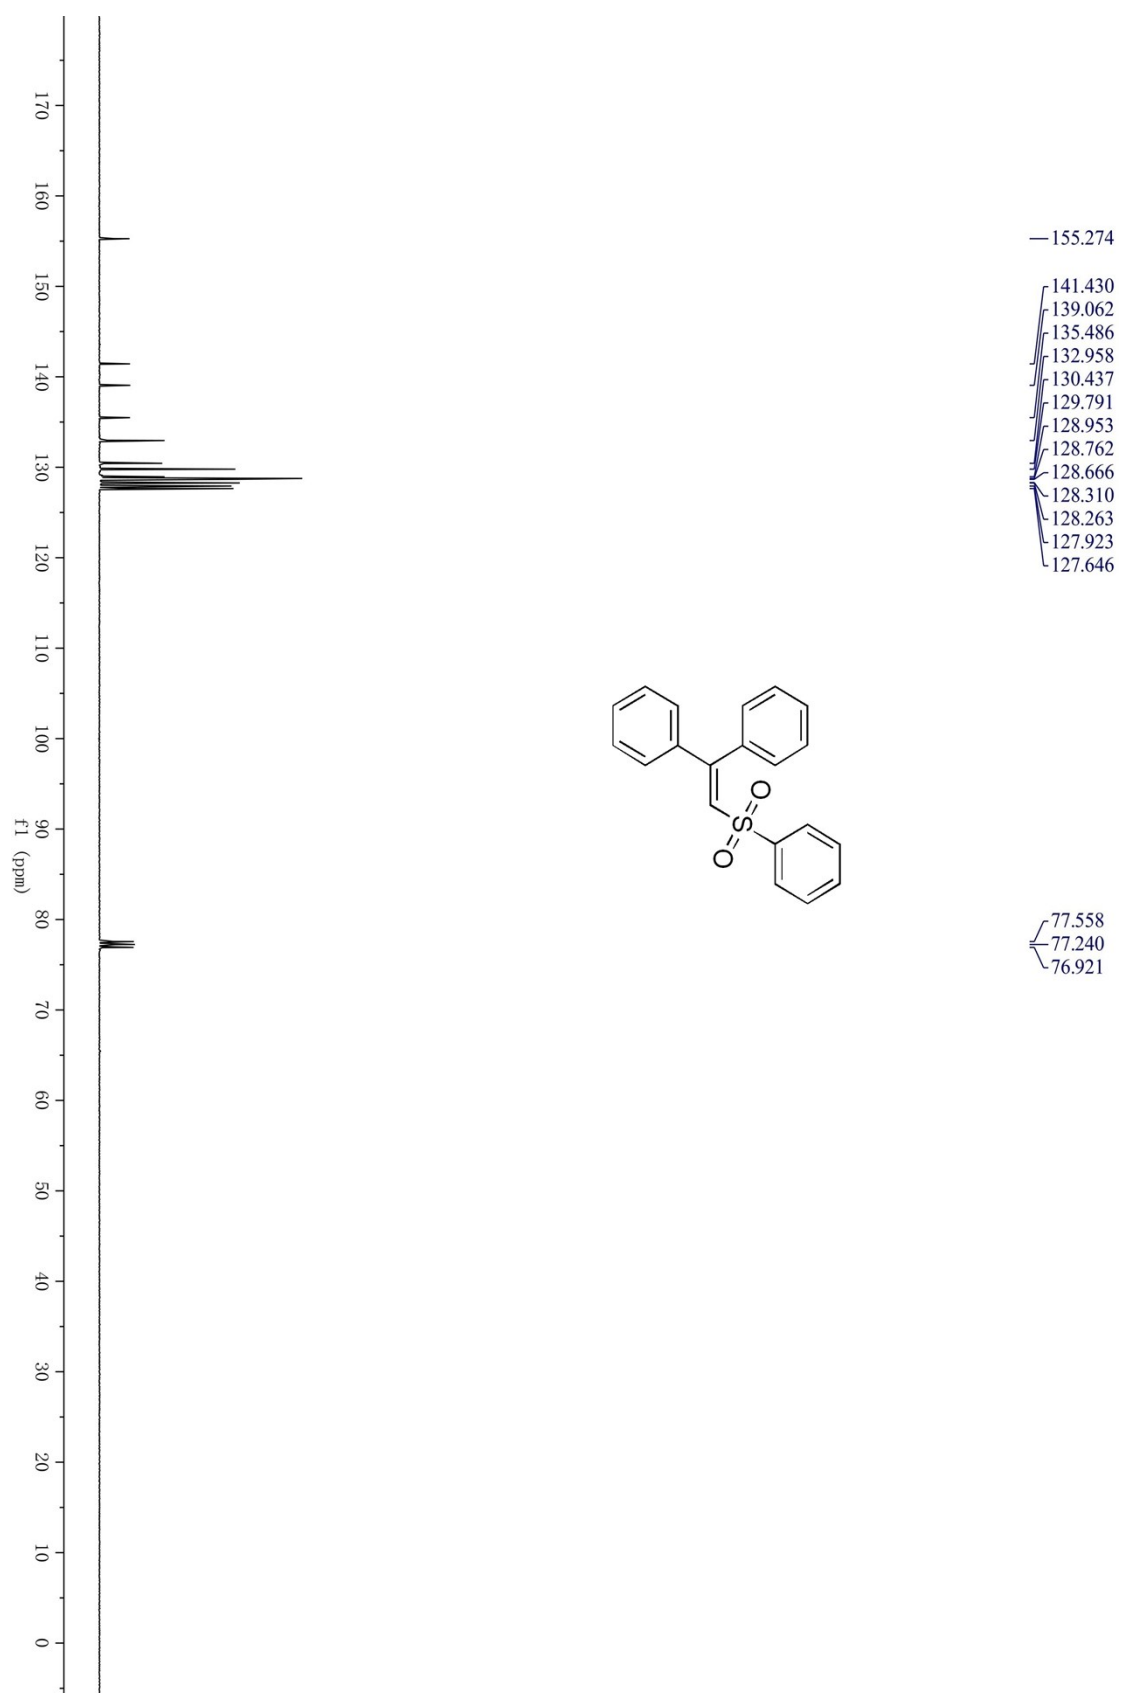

Supplement: c9ob01321k1.pdf [file c9ob01321k1.pdf]
